# Supplementary material for: A nano-organo catalyzed route towards the efficient synthesis of benzo[b]pyran derivatives under ultrasonic irradiation
Source: Royal Society of Chemistry journal article supplement (doi:10.1039/c6ra24108e), 2016-01-01
Supplement: c6ra24108e1.pdf [file c6ra24108e1.pdf]

## SUPPLEMENTARY INFORMATION FOR

### *A Nano-organo catalyzed route towards the efficient synthesis of benzo[b]pyran derivatives under Ultrasonic irradiation.*

Ridaphun Nongrum<sup>a,b</sup>, Geetmani Singh Nongthombam<sup>b</sup>, Mattilang Kharkongor<sup>c</sup>, Jims World Star Rani<sup>b</sup>, Noimur Rahman<sup>b</sup>, Chingrishon Kathing<sup>b</sup>, Bekington Myrboh<sup>b</sup> and Rishanlang Nongkhlaw<sup>b\*</sup>

<sup>a</sup>Department of Chemistry, Sankardev College, Bishnupur, Shillong, Meghalaya-793004, India.

<sup>b</sup>Centre for Advanced Studies in Chemistry, North-Eastern Hill University, Shillong, Meghalaya-793022, India.

<sup>c</sup>Department of Zoology, Sankardev College, Bishnupur, Shillong, Meghalaya-793004, India.

\*E-mail: rlnongkhlaw@nehu.ac.in; Tel.: +91-364-2722628; fax: +91-364-2550076;

| Table of Content                                                                 | Page No |
|----------------------------------------------------------------------------------|---------|
| 1. General procedure for the preparation of the catalyst                         | 2       |
| 2. <b>Table I.1.</b> X Ray Crystallography Data for compound <b>7b</b>           | 3       |
| 3. <b>Table I.2</b> X Ray Crystallography Data for compound <b>10a</b>           | 4       |
| 4. <b>Table I.3</b> X Ray Crystallography Data for compound <b>11d</b>           | 5       |
| 5. Analytical Data of the synthesized compounds                                  | 6       |
| 6. <sup>1</sup> H and <sup>13</sup> C NMR Spectra of the compounds               | 13      |
| 7. DFT Supporting information (Standard orientation of the optimized structures) | 63      |

## ***General procedure for the preparation of the catalyst***

### ***Preparation of the Fe<sub>3</sub>O<sub>4</sub> NPs***

Fe (II) and Fe (III) salts in the ratio of 1:2 was dissolved in 100ml millipore water, 1.5 M NaOH was then added dropwise and stirred vigorously for about 2 hours. The pH of the solution was adjusted in the range of 11-12. The resultant black precipitate was then isolated using an ordinary magnet and rinsed several times with millipore water.

### ***Preparation of the Fe<sub>2</sub>O<sub>3</sub>@SiO<sub>2</sub> NPs***

The prepared Fe<sub>3</sub>O<sub>4</sub> NP was calcined at temperature > 500 °C to convert it completely into Fe<sub>2</sub>O<sub>3</sub> NP. 2g of the magnetic nanoparticle was dispersed in methanol and ultrasonicated for 15 minutes. 10 ml of tetraethylorthosilicate (TEOS) was then added and further ultrasonicated for 2 hours at 50 °C. The coated nanoparticle was retrieved using a magnet and washed with methanol, diethyl ether then finally dried at 60 °C under vacuum.

### ***Preparation of the Fe<sub>2</sub>O<sub>3</sub>@SiO<sub>2</sub>@VB<sub>1</sub> NPs***

To a suspension of Fe<sub>2</sub>O<sub>3</sub>@SiO<sub>2</sub> NPs (1g) in methanol, 1.5 ml of trimethylamine was added and ultrasonicated for 30 minutes. An aqueous solution of thiamine hydrochloride (0.6g) was then added to the mixture which was further ultrasonicated for 3 hours at 50 °C. The solid thus obtained was washed with millipore water, diethyl ether and dried under vacuum at 60 °C which were then acidified with dil HCl at 0 °C to obtain Fe<sub>2</sub>O<sub>3</sub>@SiO<sub>2</sub>@VB<sub>1</sub> NPs.

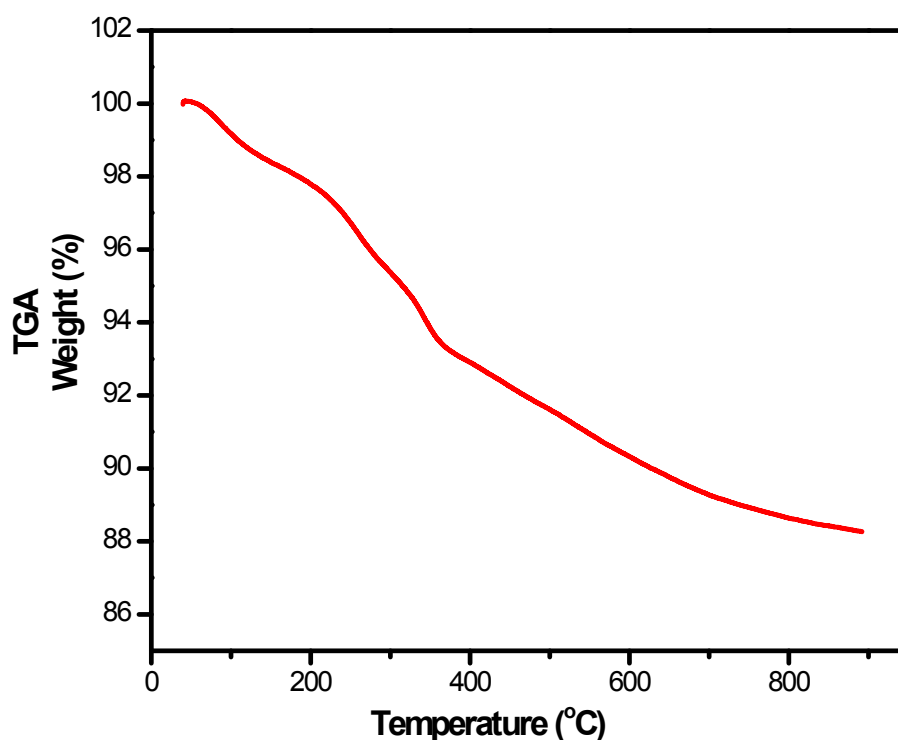

**Thermogravimetric analysis (TGA) curve of the prepared Fe<sub>2</sub>O<sub>3</sub>@SiO<sub>2</sub>@VitB<sub>1</sub>-Nps.**

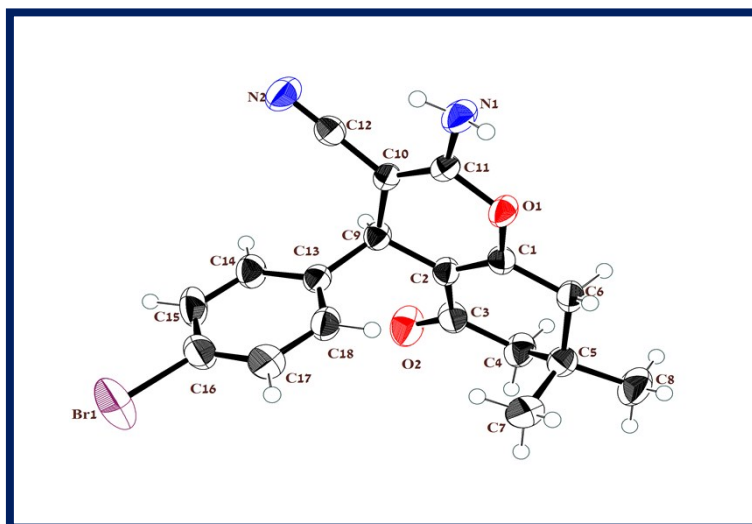

**Table I.1.** X-ray crystallography data for compound **7b** (CCDC NO 1477443)

|                                            |                                                                 |
|--------------------------------------------|-----------------------------------------------------------------|
| Empirical formula                          | C <sub>18</sub> H <sub>17</sub> BrN <sub>2</sub> O <sub>2</sub> |
| Formula weight                             | 373.25                                                          |
| Crystal system                             | triclinic                                                       |
| Space group                                | P1                                                              |
| <i>a</i> (Å)                               | 8.1438(7)                                                       |
| <i>b</i> (Å)                               | 9.3009(7)                                                       |
| <i>c</i> (Å)                               | 13.9430(13)                                                     |
| $\alpha$ (°)                               | 76.176(7)                                                       |
| $\beta$ (°)                                | 88.325(7)                                                       |
| $\gamma$ (°)                               | 78.354(7)                                                       |
| Volume (Å <sup>3</sup> )                   | 1004.21(15)                                                     |
| $\rho$ (calculated) (g cm <sup>-3</sup> )  | 1.2343                                                          |
| T(K)                                       | 293.1(5)                                                        |
| Absorption coefficient (mm <sup>-1</sup> ) | 2.055                                                           |
| Total reflection collected                 | 7833                                                            |
| Independent reflection                     | 4519                                                            |
| Refine parameter                           | 210                                                             |
| $\theta$ range (°)                         | 6.16 to 57.44                                                   |
| Final R Indexes [ $1 \geq 2\sigma(I)$ ]    | R <sub>1</sub> = 0.0595                                         |
| Final R indexes [all data]                 | R <sub>1</sub> = 0.1026                                         |
| Goodness-of-fit on F <sup>2</sup>          | 1.007                                                           |

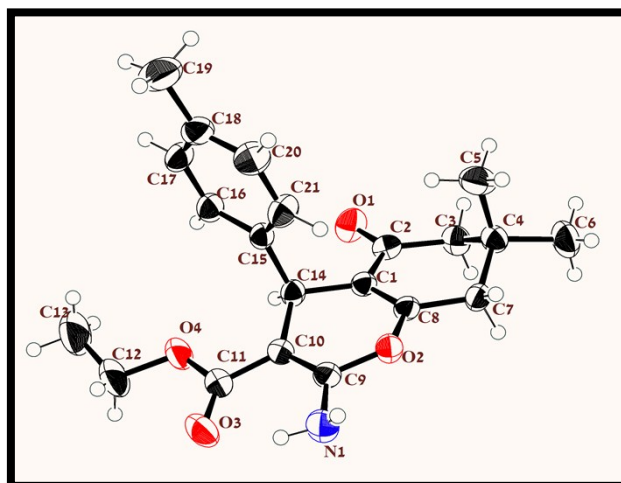

**Table I.2.** X-ray crystallography data for compound **10a** (CCDC NO1477627)

|                                            |                                                 |
|--------------------------------------------|-------------------------------------------------|
| Empirical formula                          | C <sub>21</sub> H <sub>25</sub> NO <sub>4</sub> |
| Formula weight                             | 355.44                                          |
| Crystal system                             | monoclinic                                      |
| Space group                                | P2                                              |
| <i>a</i> (Å)                               | 14.2687(10)                                     |
| <i>b</i> (Å)                               | 8.0116(7)                                       |
| <i>c</i> (Å)                               | 16.7510(11)                                     |
| $\alpha$ (°)                               | 90                                              |
| $\beta$ (°)                                | 96.487(6)                                       |
| $\gamma$ (°)                               | 90                                              |
| Volume (Å <sup>3</sup> )                   | 1902.6(2)                                       |
| $\rho$ (calculated) (g cm <sup>-3</sup> )  | 1.2407                                          |
| T(K)                                       | 294.12(18)                                      |
| Absorption coefficient (mm <sup>-1</sup> ) | 0.085                                           |
| Total reflection collected                 | 8690                                            |
| Independent reflection                     | 4379                                            |
| Refine parameter                           | 239                                             |
| $\theta$ range (°)                         | 6.46 to 57.58                                   |
| Final R Indexes [ $I \geq 2\sigma(I)$ ]    | 0.0607                                          |
| Final R indexes [all data]                 | 0.0822                                          |
| Goodness-of-fit on F <sup>2</sup>          | 1.027                                           |

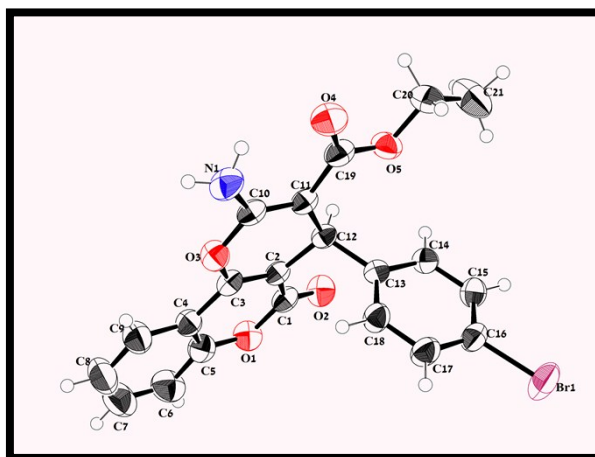

**Table I.3.** X-ray crystallography data for compound **11d** (CCDC NO1477628)

|                                            |                                                   |
|--------------------------------------------|---------------------------------------------------|
| Empirical formula                          | C <sub>21</sub> H <sub>16</sub> BrNO <sub>5</sub> |
| Formula weight                             | 442.27                                            |
| Crystal system                             | triclinic                                         |
| Space group                                | P1                                                |
| <i>a</i> (Å)                               | 8.6633(7)                                         |
| <i>b</i> (Å)                               | 10.4989(11)                                       |
| <i>c</i> (Å)                               | 10.9588(10)                                       |
| $\alpha$ ( $^{\circ}$ )                    | 99.683(8)                                         |
| $\beta$ ( $^{\circ}$ )                     | 100.554(7)                                        |
| $\gamma$ ( $^{\circ}$ )                    | 92.904(7)                                         |
| Volume (Å <sup>3</sup> )                   | 962.52(15)                                        |
| $\rho$ (calculated) (g cm <sup>-3</sup> )  | 1.5259                                            |
| T(K)                                       | 294.3(3)                                          |
| Absorption coefficient (mm <sup>-1</sup> ) | 2.168                                             |
| Total reflection collected                 | 7088                                              |
| Independent reflection                     | 4309                                              |
| Refine parameter                           | 262                                               |
| $\theta$ range ( $^{\circ}$ )              | 6.46 to 57.28                                     |
| Final R Indexes [ $1 \geq 2\sigma(I)$ ]    | R <sub>1</sub> = 0.0450                           |
| Final R indexes [all data]                 | R <sub>1</sub> = 0.0762                           |
| Goodness-of-fit on F <sup>2</sup>          | 1.023                                             |

## SPECTRAL DATA

### 2-amino-7,7-dimethyl-5-oxo-4-phenyl-5,6,7,8-tetrahydro-4H-chromene-3-carbonitrile. (7a)

Off white solid, m.p. 224-226 °C.

IR (KBr):  $\nu$  3397, 3325, 3213, 3028, 2961, 2200, 1680, 1605, 1249  $\text{cm}^{-1}$ .  $^1\text{H}$  NMR (400 MHz, DMSO- $d_6$ ):  $\delta$  7.29-7.11 (m, 5H), 7.01 (s, 2H), 4.15 (s, 1H), 2.56-2.46 (m, 2H), 2.24 (d, 1H,  $J = 16$  Hz), 2.09 (d, 1H,  $J = 16$  Hz), 1.03 (s, 3H), 0.94 (s, 3H) ppm.  $^{13}\text{C}$  NMR (100 MHz, DMSO- $d_6$ ):  $\delta$  195.6, 162.4, 158.4, 144.7, 128.2, 127.1, 126.5, 119.6, 112.6, 58.2, 49.9, 35.5, 31.7, 28.3, 26.7 ppm. ESI-MS:  $m/z$  294  $[\text{M}]^+$

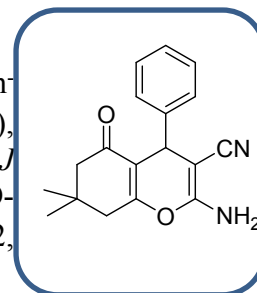

### 2-amino-4-(4-bromophenyl)-5,6,7,8-tetrahydro-7,7-dimethyl-5-oxo-4H-chromene-3-carbonitrile. (7b)

White solid, m.p. 202-204 °C.

IR (KBr):  $\nu$  3393, 3319, 3212, 2963, 2191, 1678, 1605, 1486, 1252  $\text{cm}^{-1}$ .  $^1\text{H}$  NMR (400 MHz, DMSO- $d_6$ ):  $\delta$  7.47 (d, 2H,  $J = 8.8$  Hz), 7.11-7.09 (m, 4H), 4.17 (s, 1H), 2.55-2.45 (m, 2H), 2.24 (d, 1H,  $J = 16$  Hz), 2.09 (d, 1H,  $J = 16$  Hz), 1.02 (s, 3H), 0.94 (s, 3H) ppm.  $^{13}\text{C}$  NMR (100 MHz, DMSO- $d_6$ ):  $\delta$  195.6, 162.5, 158.4, 144.1, 131.1, 129.4, 119.5, 112.2, 57.6, 55.9, 49.8, 35.1, 31.7, 28.2, 26.8 ppm. ESI-MS:  $m/z$  372  $[\text{M}]^+$ , 374  $[\text{M}+2]^+$ .

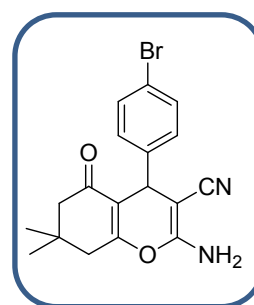

### 2-amino-4-(4-chlorophenyl)-5,6,7,8-tetrahydro-7,7-dimethyl-5-oxo-4H-chromene-3-carbonitrile. (7c)

Off white solid, m.p. 214-216 °C.

IR (KBr):  $\nu$  3380, 3183, 2958, 2188, 1675, 1635, 1491, 1246  $\text{cm}^{-1}$ .  $^1\text{H}$  NMR (400 MHz, DMSO- $d_6$ ):  $\delta$  7.34 (d, 2H,  $J = 7.2$  Hz), 7.16 (d, 2H,  $J = 7.2$  Hz), 7.07 (s, 2H), 4.18 (s, 1H), 2.66-2.45 (m, 2H), 2.24 (d, 1H,  $J = 15.6$  Hz), 2.09 (d, 1H,  $J = 16$  Hz), 1.05 (s, 3H), 0.95 (s, 3H) ppm.  $^{13}\text{C}$  NMR (100 MHz, DMSO- $d_6$ ):  $\delta$  195.6, 162.5, 158.4, 143.7, 131.0, 129.0, 128.2, 119.5, 112.2, 57.6, 49.8, 35.0, 31.7, 28.2, 26.8 ppm. ESI-MS:  $m/z$  328  $[\text{M}]^+$ , 330  $[\text{M}+2]^+$ .

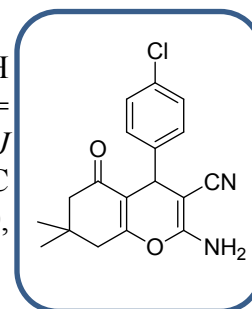

### 2-amino-5,6,7,8-tetrahydro-4-(4-hydroxyphenyl)-7,7-dimethyl-5-oxo-4H-chromene-3-carbonitrile. (7e)

White solid, m.p. 211-213 °C.

IR (KBr):  $\nu$  3420, 3287, 3163, 2965, 2191, 1679, 1658, 1510, 1246  $\text{cm}^{-1}$ .  $^1\text{H}$  NMR (400 MHz, DMSO- $d_6$ ):  $\delta$  9.25 (s, 1H), 6.92-6.90 (m, 4H), 6.64 (d, 2H,  $J = 8.8$  Hz), 4.05 (s, 1H), 2.53-2.42 (m, 2H), 2.23 (d, 1H,  $J = 15.6$  Hz), 2.08 (d, 1H,  $J = 16$  Hz), 1.02 (s, 3H), 0.93 (s, 3H) ppm.  $^{13}\text{C}$  NMR (100 MHz, DMSO- $d_6$ ):  $\delta$  195.6, 161.9, 158.3, 155.9, 135.1, 128.1, 119.8, 114.9, 113.1, 58.7, 49.9, 34.6, 31.7, 28.3, 26.7 ppm. ESI-MS:  $m/z$  310  $[\text{M}]^+$ .

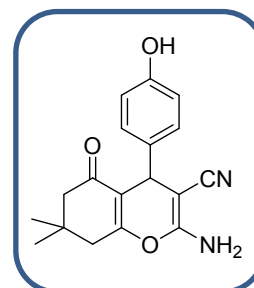

**2-amino-7,7-dimethyl-5-oxo-4-(p-tolyl)-5,6,7,8-tetrahydro-4H-chromene-3-carbonitrile. (7f)**

Off white solid, m.p. 214-216 °C.

IR (KBr):  $\nu$  3426, 3330, 3023, 2957, 2191, 1672, 1639, 1510, 1248  $\text{cm}^{-1}$ .  $^1\text{H}$  NMR (400 MHz,  $\text{CDCl}_3+\text{DMSO}-d_6$ ):  $\delta$  7.04-6.99 (m, 4H), 5.71 (s, 2H), 4.22 (s, 1H), 2.22 (s, 3H), 2.19-2.07 (m, 4H), 1.04 (s, 3H), 0.96 (s, 3H) ppm.  $^{13}\text{C}$  NMR (100 MHz,  $\text{CDCl}_3+\text{DMSO}-d_6$ ):  $\delta$  195.5, 161.3, 157.8, 140.5, 135.7, 128.5, 126.8, 119.1, 113.3, 60.5, 50.1, 40.1, 34.7, 31.6, 28.4, 27.0, 20.5 ppm. ESI-MS:  $m/z$  308  $[\text{M}]^+$

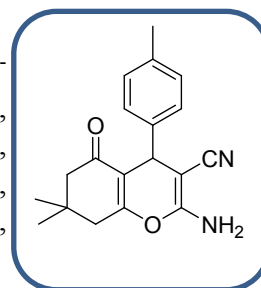

**2-amino-5,6,7,8-tetrahydro-7,7-dimethyl-4-(2-nitrophenyl)-5-oxo-4H-chromene-3-carbonitrile. (7g)**

White yellowish solid, m.p. 220-222 °C.

IR (KBr):  $\nu$  3471, 3333, 3036, 2959, 2194, 1667, 1597, 1523, 1470, 1254  $\text{cm}^{-1}$ .  $^1\text{H}$  NMR (400 MHz,  $\text{DMSO}-d_6$ ):  $\delta$  7.56 (d, 1H,  $J = 7.2$  Hz), 7.40 (t, 1H,  $J = 7.6$  Hz), 7.17 (t, 1H,  $J = 8.8$  Hz), 7.10 (d, 1H,  $J = 7.2$  Hz), 6.97 (s, 2H), 4.67 (s, 1H), 2.30-2.18 (m, 2H), 1.96 (d, 1H,  $J = 17.2$  Hz), 1.76 (d, 1H,  $J = 16$  Hz), 0.75 (s, 3H), 0.62 (s, 3H) ppm.  $^{13}\text{C}$  NMR (100 MHz,  $\text{DMSO}-d_6$ ):  $\delta$  195.7, 162.6, 159.1, 148.9, 138.9, 133.3, 130.2, 127.8, 123.6, 119.0, 112.2, 56.2, 49.4, 31.8, 29.8, 28.2, 26.6 ppm. ESI-MS:  $m/z$  339  $[\text{M}]^+$

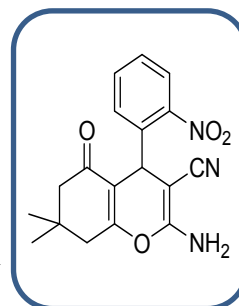

**2-amino-4-(2-chlorophenyl)-5,6,7,8-tetrahydro-7,7-dimethyl-5-oxo-4H-chromene-3-carbonitrile. (7h)**

White solid, m.p. 214-216 °C.

IR (KBr):  $\nu$  3473, 3328, 3010, 2960, 2874, 2197, 1658, 1605, 1469, 1366, 1250  $\text{cm}^{-1}$ .  $^1\text{H}$  NMR (400 MHz,  $\text{DMSO}-d_6$ ):  $\delta$  7.36 (d, 1H,  $J = 7.6$  Hz), 7.27 (t, 1H,  $J = 7.2$  Hz), 7.21-7.15 (m, 2H), 7.05 (s, 2H), 4.68 (s, 1H), 2.57-2.45 (m, 2H), 2.24 (d, 1H,  $J = 16$  Hz), 2.07 (d, 1H,  $J = 16$  Hz), 1.03 (s, 3H), 0.97 (s, 3H) ppm.  $^{13}\text{C}$  NMR (100 MHz,  $\text{DMSO}-d_6$ ):  $\delta$  195.5, 163.1, 158.6, 141.5, 132.0, 129.9, 129.4, 128.1, 127.4, 119.2, 111.7, 56.7, 49.8, 32.7, 31.7, 28.3, 26.8 ppm. ESI-MS:  $m/z$  328  $[\text{M}]^+$ , 330  $[\text{M}+2]^+$ .

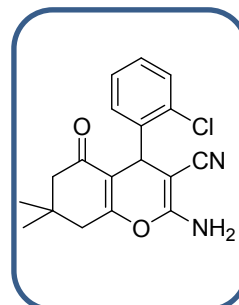

**2-amino-5,6,7,8-tetrahydro-7,7-dimethyl-5-oxo-4-styryl-4H-chromene-3-carbonitrile. (7j)**

White solid, m.p. 180-182 °C.

IR (KBr):  $\nu$  3386, 3297, 3023, 2959, 2184, 1680, 1655, 1608, 1376, 1245  $\text{cm}^{-1}$ .  $^1\text{H}$  NMR (400 MHz,  $\text{DMSO}-d_6$ ):  $\delta$  7.37 (d, 2H,  $J = 7.6$  Hz), 7.29 (t, 2H,  $J = 7.6$  Hz), 7.22-7.19 (m, 1H), 7.08 (s, 2H), 6.35 (d, 1H,  $J = 16$  Hz), 6.06 (dd, 1H,  $J = 16$  Hz, 8Hz), 3.80 (d, 1H,  $J = 8$ Hz), 2.48 - 2.37 (m, 2H), 2.27 (d, 1H,  $J = 16$  Hz), 2.20 (d, 1H,  $J = 16$  Hz), 1.02 (s, 3H), 0.99 (s, 3H) ppm.  $^{13}\text{C}$  NMR (100 MHz,  $\text{DMSO}-d_6$ ):  $\delta$  195.8, 162.4, 159.2, 136.4, 131.0, 129.2, 128.5, 127.3, 126.1, 119.8, 111.8, 55.1, 50.0, 32.7, 31.7, 28.1, 26.8 ppm. ESI-MS:  $m/z$  320  $[\text{M}]^+$ .

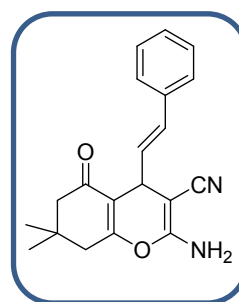

### 2-amino-5-oxo-4-phenyl-4,5-dihydropyrano[3,2-c]chromene-3-carbonitrile. (8a)

White solid, m.p. 255-257 °C.

IR (KBr):  $\nu$  3378, 3285, 3180, 2198, 1709, 1675, 1606, 1381, 1273, 1171  $\text{cm}^{-1}$ .  $^1\text{H}$  NMR (400 MHz, DMSO- $d_6$ ):  $\delta$  7.89 (d, 1H,  $J = 7.2$  Hz), 7.71 (t, 1H,  $J = 8.8$  Hz), 7.51-7.44 (m, 2H), 7.41 (s, 2H), 7.33-7.21 (m, 5H), 4.44 (s, 1H) ppm.  $^{13}\text{C}$  NMR (100 MHz, DMSO- $d_6$ ):  $\delta$  159.4, 157.9, 153.3, 152.0, 143.2, 132.8, 128.4, 127.5, 127.0, 124.6, 122.4, 119.2, 116.5, 112.9, 103.9, 57.9, 36.9 ppm. ESI-MS:  $m/z$  316  $[\text{M}]^+$ .

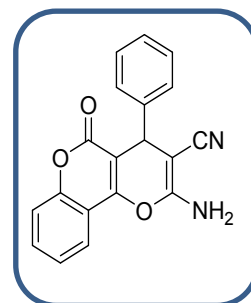

### 2-amino-5-oxo-4-(*p*-tolyl)-4,5-dihydropyrano[3,2-c]chromene-3-carbonitrile. (8b)

White solid, m.p. 250-252 °C.

IR (KBr):  $\nu$  3390, 3313, 3194, 3042, 2919, 2195, 1715, 1677, 1638, 1611, 1608, 1377  $\text{cm}^{-1}$ .  $^1\text{H}$  NMR (400 MHz, DMSO- $d_6$ ):  $\delta$  7.88 (d, 1H,  $J = 7.2$  Hz), 7.72-7.68 (m, 1H), 7.50-7.44 (m, 4H), 7.38 (s, 2H), 7.13-7.09 (m, 4H), 4.39 (s, 1H), 2.25 (s, 3H) ppm.  $^{13}\text{C}$  NMR (100 MHz, DMSO- $d_6$ ):  $\delta$  159.4, 157.8, 153.3, 152.0, 140.3, 136.2, 132.8, 129.0, 127.4, 124.6, 122.4, 119.2, 116.5, 112.9, 104.0, 58.0, 36.5, 20.5 ppm. ESI-MS:  $m/z$  330  $[\text{M}]^+$ .

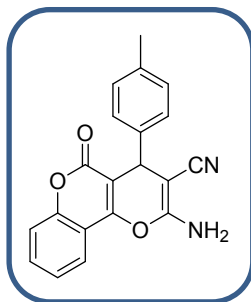

### 2-amino-4-(4-chlorophenyl)-4,5-dihydro-5-oxopyrano[3,2-c]chromene-3-carbonitrile. (8c)

White solid, m.p. 261-263 °C.

IR (KBr):  $\nu$  3382, 3311, 3291, 3189, 3050, 2192, 1712, 1679, 1638, 1610, 1377  $\text{cm}^{-1}$ .  $^1\text{H}$  NMR (400 MHz, DMSO- $d_6$ ):  $\delta$  7.89 (d, 1H,  $J = 8.4$  Hz), 7.71 (t, 1H,  $J = 8.8$  Hz), 7.51-7.45 (m, 4H), 7.36 (d, 2H,  $J = 7.6$  Hz), 7.30 (d, 2H,  $J = 7.6$  Hz), 4.48 (s, 1H) ppm.  $^{13}\text{C}$  NMR (100 MHz, DMSO- $d_6$ ):  $\delta$  159.4, 157.9, 153.5, 152.1, 142.2, 132.9, 131.6, 129.6, 128.3, 124.6, 122.4, 119.0, 116.5, 112.8, 103.4, 57.4, 36.3 ppm. ESI-MS:  $m/z$  350  $[\text{M}]^+$ , 352  $[\text{M}+2]^+$ .

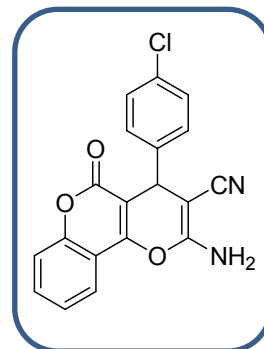

### 2-amino-4,5-dihydro-4-(4-hydroxyphenyl)-5-oxopyrano[3,2-c]chromene-3-carbonitrile. (8d)

White solid, m.p. 260-262 °C.

IR (KBr):  $\nu$  3505, 3408, 3287, 3184, 2197, 1696, 1674, 1610, 1513, 1460, 1381  $\text{cm}^{-1}$ .  $^1\text{H}$  NMR (400 MHz, DMSO- $d_6$ ):  $\delta$  9.36 (s, 1H), 7.88 (d, 1H,  $J = 7.2$  Hz), 7.70 (t, 1H,  $J = 8$  Hz), 7.50-7.44 (m, 2H), 7.34 (s, 2H), 7.03 (d, 2H,  $J = 8.4$  Hz), 6.67 (d, 1H,  $J = 7.2$  Hz), 4.32 (s, 1H) ppm.  $^{13}\text{C}$  NMR (100 MHz, DMSO- $d_6$ ):  $\delta$  159.5, 157.8, 156.4, 152.9, 151.9, 133.6, 132.7, 128.6, 124.5, 122.3, 119.5, 116.4, 115.1, 112.9, 104.4, 58.3, 36.0 ppm. ESI-MS:  $m/z$  332  $[\text{M}]^+$ .

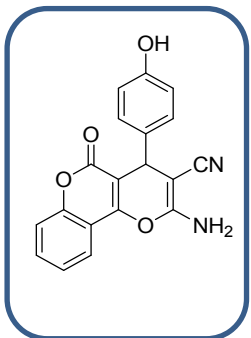



### 2-amino-4,5-dihydro-5-oxo-4-styrylpyrano[3,2-c]chromene-3-carbonitrile. (8e)

Yellow solid, m.p. 198-200 °C.

IR (KBr):  $\nu$  3320, 3200, 3021, 2190, 1712, 1675, 1606, 1495, 1376  $\text{cm}^{-1}$ .  $^1\text{H}$  NMR (400 MHz, DMSO- $d_6$ ):  $\delta$  7.84 (d, 1H,  $J = 7.6$  Hz), 7.70 (t, 1H,  $J = 7.2$  Hz), 7.48-7.41 (m, 6H), 7.30 (t, 2H,  $J = 7.6$  Hz), 7.23- 7.20 (m, 1H), 6.53 (d, 1H,  $J = 16$ Hz), 6.22 (dd, 1H,  $J = 16$  Hz, 8 Hz), 4.03 (d, 1H,  $J = 8$  Hz) ppm.  $^{13}\text{C}$  NMR (100 MHz, DMSO- $d_6$ ):  $\delta$  159.6, 158.5, 153.2, 152.0, 136.2, 132.8, 130.4, 129.6, 128.5, 127.5, 126.3, 124.5, 122.2, 119.4, 116.5, 113.0, 103.0, 55.1, 34.4 ppm. ESI-MS:  $m/z$  342[M] $^+$ .

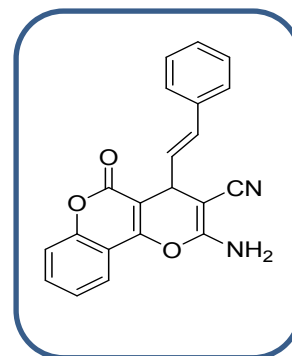

### 2-amino-5,6,7,8-tetrahydro-5-oxo-4-*p*-tolyl-4*H*-chromene-3-carbonitrile. (9b)

White solid, m.p. 210-212 °C.

IR (KBr):  $\nu$  3410, 3333, 3219, 2197, 1684, 1660, 1605, 1368  $\text{cm}^{-1}$ .  $^1\text{H}$  NMR (400 MHz, DMSO- $d_6$ ):  $\delta$  7.06 (d, 2H,  $J = 8.8$  Hz), 7.01 (d, 2H,  $J = 7.2$  Hz), 6.96 (s, 2H), 4.11 (s, 1H), 2.63-2.58 (m, 2H), 2.31-2.25 (m, 2H), 2.23 (s, 3H), 1.94-1.86 (m, 2H) ppm.  $^{13}\text{C}$  NMR (100 MHz, DMSO- $d_6$ ):  $\delta$  195.8, 164.2, 158.3, 141.8, 135.5, 128.8, 127.0, 119.7, 113.8, 58.2, 36.2, 34.9, 26.4, 20.5, 19.7 ppm. ESI-MS:  $m/z$  280 [M] $^+$ .

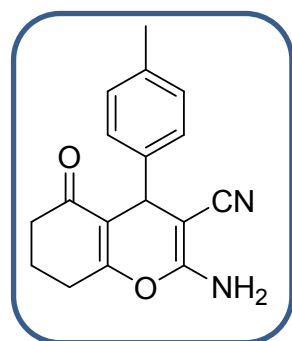

### 2-amino-5,6,7,8-tetrahydro-4-(4-nitrophenyl)-5-oxo-4*H*-chromene-3-carbonitrile. (9c)

Yellow solid, m.p. 220-222 °C.

IR (KBr):  $\nu$  3415, 3336, 3218, 2195, 1681, 1652, 1602, 1518, 1364  $\text{cm}^{-1}$ .  $^1\text{H}$  NMR (400 MHz, DMSO- $d_6$ ):  $\delta$  8.14 (d, 2H,  $J = 8.4$  Hz), 7.44 (d, 2H,  $J = 8.4$  Hz), 7.18 (s, 2H), 4.34 (s, 1H), 2.63-2.30 (m, 2H), 2.29-2.19 (m, 2H), 1.95-1.91 (m, 2H) ppm.  $^{13}\text{C}$  NMR (100 MHz, DMSO- $d_6$ ):  $\delta$  195.8, 165.0, 158.4, 152.2, 146.1, 128.5, 123.6, 119.3, 112.6, 58.8, 36.1, 35.5, 26.4, 19.6 ppm. ESI-MS:  $m/z$  311[M] $^+$ .

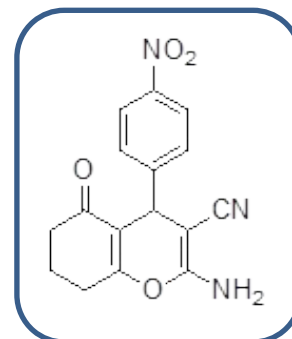

### 2-amino-4-(2-chlorophenyl)-5,6,7,8-tetrahydro-5-oxo-4*H*-chromene-3-carbonitrile. (9d)

White solid, m.p. 213-215 °C,

IR (KBr):  $\nu$  3328, 3254, 3182, 2955, 2190, 1650, 1606, 1470, 1368  $\text{cm}^{-1}$ .  $^1\text{H}$  NMR (400 MHz, DMSO- $d_6$ ):  $\delta$  7.34 (d, 1H,  $J = 8.8$  Hz), 7.26- 7.16 (m, 3H), 7.02 (s, 2H), 4.68 (s, 1H), 2.65-2.58 (m, 2H), 2.28-2.17 (m, 2H), 1.95-1.88 (m, 2H) ppm.  $^{13}\text{C}$  NMR (100 MHz, DMSO- $d_6$ ):  $\delta$  195.6, 165.0, 158.4, 141.7, 132.0, 129.7, 129.2, 128.0, 127.4, 119.2, 112.8, 56.7, 36.2, 32.6, 26.4, 19.7 ppm. ESI-MS:  $m/z$  300 [M] $^+$ , 302 [M+2] $^+$ .

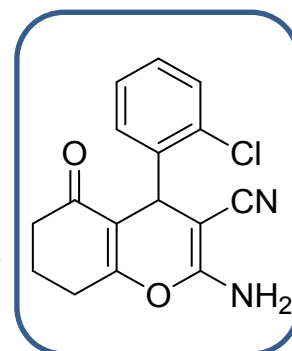

**2-amino-5,6,7,8-tetrahydro-4-(4-hydroxyphenyl)-5-oxo-4H-chromene-3-carbonitrile. (9e)**

White solid, m.p. 240-242 °C,

IR (KBr):  $\nu$  3380, 3194, 2817, 2199, 1674, 1646, 1604, 1512, 1374  $\text{cm}^{-1}$ .

$^1\text{H}$  NMR (400 MHz, DMSO- $d_6$ ):  $\delta$  9.25 (s, 1H), 6.92-6.90 (m, 4H), 6.63 (d, 2H,  $J = 8.4$  Hz), 4.05 (s, 1H), 2.65-2.57 (m, 2H), 2.25-2.22 (m, 2H), 1.93-1.83 (m, 2H) ppm.  $^{13}\text{C}$  NMR (100 MHz, DMSO- $d_6$ ):  $\delta$  195.8, 163.9, 158.3, 155.9, 135.1, 128.0, 119.9, 114.9, 114.2, 58.8, 36.3, 34.4, 26.3, 19.7 ppm. ESI-MS:  $m/z$  282  $[\text{M}]^+$ .

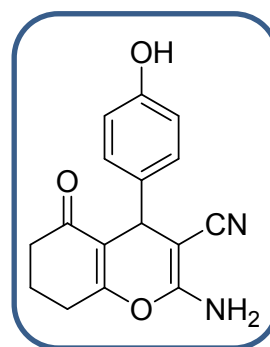

**Ethyl-2-amino-7,7-dimethyl-5-oxo-4-(p-tolyl)-5,6,7,8-tetrahydro-4H-chromene-3-carboxylate. (10a)**

White solid, m.p. 151-153 °C.

IR (KBr):  $\nu$  3408, 3293, 2980, 1689, 1668, 1623, 1523, 1472, 1366  $\text{cm}^{-1}$ .  $^1\text{H}$  NMR (400 MHz, DMSO- $d_6$ ):  $\delta$  7.52 (s, 2H), 7.02-6.98 (m, 4H), 4.45 (s, 1H), 3.97-3.90 (m, 2H), 2.56-2.42 (m, 2H), 2.25 (d, 1H,  $J = 16.8$  Hz), 2.20 (s, 3H), 2.04 (d, 1H,  $J = 16$  Hz), 1.10 (t, 3H,  $J = 8$  Hz), 1.03 (s, 3H), 0.88 (s, 3H) ppm.  $^{13}\text{C}$  NMR (100 MHz, DMSO- $d_6$ ):  $\delta$  195.7, 167.9, 161.9, 159.0, 143.3, 134.6, 128.2, 127.5, 115.6, 77.9, 58.7, 49.9, 32.7, 31.8, 28.6, 26.3, 20.5, 14.1 ppm. ESI-MS:  $m/z$  355  $[\text{M}]^+$ .

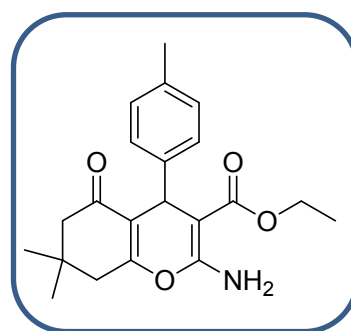

**Ethyl-2-amino-4-(4-methoxyphenyl)-7,7-dimethyl-5-oxo-5,6,7,8-tetrahydro-4H-chromene-3-carboxylate. (10b)**

White solid, m.p. 140-142 °C.

IR (KBr):  $\nu$  3412, 3304, 2959, 2837, 1670, 1625, 1527, 1445, 1367  $\text{cm}^{-1}$ .  $^1\text{H}$  NMR (400 MHz, DMSO- $d_6$ ):  $\delta$  7.51 (s, 2H), 7.02 (d, 2H,  $J = 8.4$  Hz), 6.75 (d, 2H,  $J = 8.4$  Hz), 4.43 (s, 1H), 3.96-3.90 (m, 2H), 3.66 (s, 3H), 2.53 (d, 1H,  $J = 16$  Hz), 2.43 (d, 1H,  $J = 18$  Hz), 2.24 (d, 1H,  $J = 17.2$  Hz), 2.04 (d, 1H,  $J = 15.6$  Hz), 1.09 (t, 3H,  $J = 8$  Hz), 1.02 (s, 3H), 0.89 (s, 3H) ppm.  $^{13}\text{C}$  NMR (100 MHz, DMSO- $d_6$ ):  $\delta$  195.8, 168.0, 161.8, 159.0, 157.2, 138.4, 128.5, 115.7, 113.0, 78.0, 58.7, 54.8, 49.9, 32.2, 31.8, 28.6, 26.4, 14.1 ppm. ESI-MS:  $m/z$  371  $[\text{M}]^+$ .

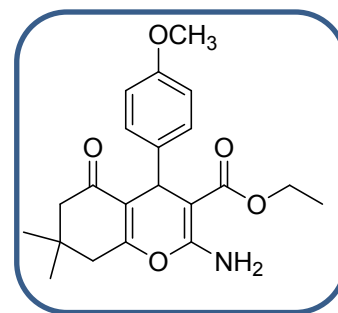

**Ethyl-4-(4-chlorophenyl)-2,7,7-trimethyl-5-oxo-5,6,7,8-tetrahydro-4H-chromene-3-carboxylate. (10c)**

White solid, m.p. 150-152 °C.

IR (KBr):  $\nu$  3479, 3331, 2975, 2880, 1687, 1658, 1621, 1526, 1489, 1369  $\text{cm}^{-1}$ .  $^1\text{H}$  NMR (400 MHz, DMSO- $d_6$ ):  $\delta$  7.60 (s, 2H), 7.26 (d, 2H,  $J = 8.4$  Hz), 7.14 (d, 2H,  $J = 8.4$  Hz), 4.47 (s, 1H), 3.94 (q, 2H,  $J = 7.2$  Hz), 2.55 (d, 1H,  $J = 16.8$  Hz), 2.45 (d, 1H,  $J = 16$  Hz), 2.26 (d, 1H,  $J = 16$  Hz), 2.07 (d, 1H,  $J = 16$  Hz), 1.08 (t, 3H,  $J = 8$  Hz), 1.03 (s, 3H), 0.88 (s, 3H) ppm.  $^{13}\text{C}$  NMR (100 MHz, DMSO- $d_6$ ):  $\delta$  195.8, 167.7, 162.2, 159.0, 145.3, 130.2, 129.5, 127.6, 115.0, 77.2, 58.8,

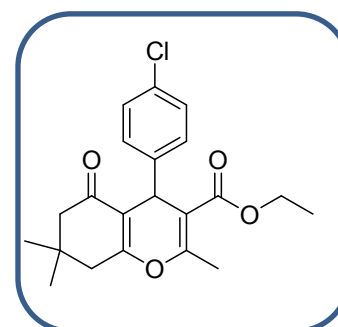

49.8, 32.9, 31.8, 28.5, 26.4, 14.1 ppm. ESI-MS:  $m/z$  374  $[M]^+$ , 376  $[M+2]^+$ .

**Ethyl-4-(4-bromophenyl)-2,7,7-trimethyl-5-oxo-5,6,7,8-tetrahydro-4H-chromene-3-carboxylate. (10d)**

White solid, m.p. 156-158 °C.

IR (KBr):  $\nu$  3474, 3333, 2973, 2880, 1688, 1658, 1621, 1525, 1370  $\text{cm}^{-1}$ .  $^1\text{H}$  NMR (400 MHz,  $\text{DMSO-d}_6$ ):  $\delta$  7.59 (s, 2H), 7.39 (d, 2H,  $J = 8.8$  Hz), 7.08 (d, 2H,  $J = 8.8$  Hz), 4.45 (s, 1H), 3.94 (q, 2H,  $J = 7.2$  Hz), 2.55 (d, 1H,  $J = 16.8$  Hz), 2.45 (d, 1H,  $J = 17.2$  Hz), 2.26 (d, 1H,  $J = 15.6$  Hz), 2.05 (d, 1H,  $J = 16$  Hz), 1.08 (t, 3H,  $J = 7.2$  Hz), 1.03 (s, 3H), 0.88 (s, 3H) ppm.  $^{13}\text{C}$  NMR (100 MHz,  $\text{DMSO-d}_6$ ):  $\delta$  195.8, 167.7, 162.2, 159.0, 145.7, 130.5, 129.9, 118.7, 114.9, 77.1, 58.8, 49.8, 33.0, 31.8, 28.5, 26.4, 14.1 ppm. ESI-MS:  $m/z$  419 $[M]^+$ , 421  $[M+2]^+$ .

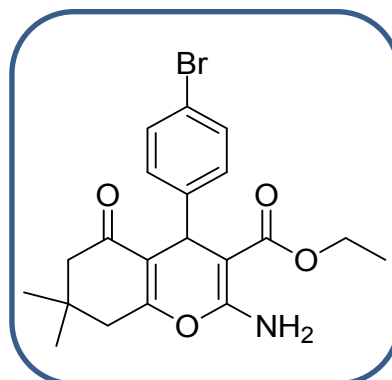

**Ethyl-4-(2-chlorophenyl)-2,7,7-trimethyl-5-oxo-5,6,7,8-tetrahydro-4H-chromene-3-carboxylate. (10e)**

White solid, m.p. 166-168 °C.

IR (KBr):  $\nu$  3418, 3306, 2957, 1670, 1615, 1516, 1474, 1365  $\text{cm}^{-1}$ .  $^1\text{H}$  NMR (400 MHz,  $\text{DMSO-d}_6$ ):  $\delta$  7.64 (s, 2H), 7.24 - 7.08 (m, 4H), 4.82 (s, 1H), 3.89 (q, 2H,  $J = 7.6$  Hz), 2.56 (d, 1H,  $J = 16.8$  Hz), 2.40 (d, 1H,  $J = 18.4$  Hz), 2.24 (d, 1H,  $J = 16$  Hz), 2.01 (d, 1H,  $J = 15.6$  Hz), 1.03-1.00 (m, 6H), 0.89 (s, 3H) ppm.  $^{13}\text{C}$  NMR (100 MHz,  $\text{DMSO-d}_6$ ):  $\delta$  195.5, 168.0, 162.2, 159.2, 142.7, 132.5, 131.8, 129.2, 127.3, 126.3, 113.8, 76.2, 58.6, 49.9, 32.1, 31.6, 28.6, 26.3, 14.1 ppm. ESI-MS:  $m/z$  375  $[M]^+$ , 377  $[M+2]^+$ .

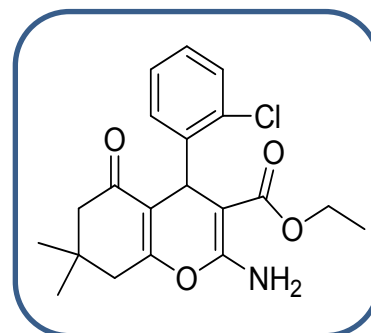

**Ethyl-2-amino-4-(4-methoxyphenyl)-5-oxo-4,5-dihydropyrano[3,2-c]chromene-3-carboxylate. (11b)**

White solid, m.p. 164-166 °C.

IR (KBr):  $\nu$  3396, 3285, 2953, 2199, 1686, 1651, 1612, 1533, 1493, 1377  $\text{cm}^{-1}$ .  $^1\text{H}$  NMR (400 MHz,  $\text{DMSO-d}_6$ ):  $\delta$  7.95 (d, 1H,  $J = 8$  Hz), 7.79 (s, 2H), 7.68 (t, 1H,  $J = 8$  Hz), 7.49-7.42 (m, 2H), 7.12 (d, 2H,  $J = 8$  Hz), 6.78 (d, 2H,  $J = 8$  Hz), 4.63 (s, 1H), 3.99-3.97 (m, 2H), 3.66 (s, 3H), 1.11 (t, 3H,  $J = 8$  Hz) ppm.  $^{13}\text{C}$  NMR (100 MHz,  $\text{DMSO-d}_6$ ):  $\delta$  167.5, 159.8, 158.4, 157.7, 152.8, 151.9, 137.0, 132.5, 128.8, 124.5, 122.3, 116.4, 113.3, 113.1, 107.0, 77.2, 58.9, 54.8, 34.2, 14.1 ppm. ESI-MS:  $m/z$  393 $[M]^+$ .

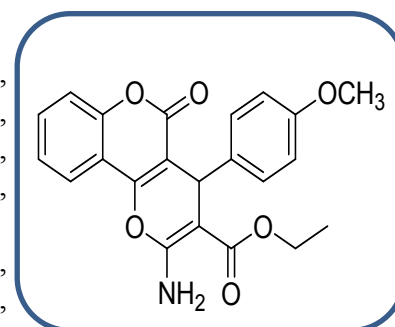

**Ethyl-2-amino-4-(4-chlorophenyl)-5-oxo-4,5-dihydropyrano[3,2-c]chromene-3-carboxylate. (11c)**

White solid, m.p. 190-192 °C.

IR (KBr):  $\nu$  3419, 3297, 2913, 1715, 1692, 1651, 1610, 1519, 1489, 1375  $\text{cm}^{-1}$ .  $^1\text{H}$  NMR (400 MHz,  $\text{DMSO-d}_6$ ):  $\delta$  7.71 (d, 1H,  $J = 7.2$  Hz), 7.63 (s, 2H), 7.50 (t, 1H,  $J = 8$  Hz), 7.26-7.19 (m, 2H), 7.05- 6.99 (m, 4H), 4.42 (s, 1H), 3.74 (q, 2H,  $J = 7.2$  Hz), 0.85 (t, 3H,  $J = 8$  Hz) ppm.  $^{13}\text{C}$  NMR (100 MHz,  $\text{DMSO-d}_6$ ):  $\delta$  167.3, 159.8, 158.4, 153.1, 152.0, 143.9, 132.7, 130.8, 129.9, 127.8, 124.5, 122.4, 116.4, 113.0, 106.2, 76.5, 59.0, 34.8, 14.1 ppm. ESI-MS:  $m/z$  397  $[\text{M}]^+$ , 399  $[\text{M}+2]^+$ .

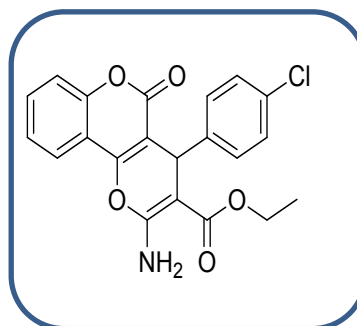

**Ethyl-2-amino-4-(4-bromophenyl)-5-oxo-4,5-dihydropyrano[3,2-c]chromene-3-carboxylate. (11d)**

White solid, m.p. 194-196 °C.

IR (KBr):  $\nu$  3421, 3295, 2982, 1716, 1651, 1610, 1535, 1519, 1491, 1375  $\text{cm}^{-1}$ .  $^1\text{H}$  NMR (400 MHz,  $\text{DMSO-d}_6$ ):  $\delta$  7.95 (d, 1H,  $J = 8$  Hz), 7.87 (s, 2H), 7.68 (t, 1H,  $J = 7.2$  Hz), 7.49-7.40 (m, 4H), 7.19- 6.17 (m, 2H), 4.65 (s, 1H), 3.98 (q, 2H,  $J = 7.2$  Hz), 1.09 (t, 3H,  $J = 7.2$  Hz) ppm.  $^{13}\text{C}$  NMR (100 MHz,  $\text{DMSO-d}_6$ ):  $\delta$  167.3, 159.8, 158.4, 153.2, 152.0, 144.3, 132.7, 130.7, 130.2, 124.6, 122.4, 119.3, 116.5, 113.0, 106.1, 76.4, 59.0, 34.8, 14.1 ppm. ESI-MS:  $m/z$  441  $[\text{M}]^+$ , 443  $[\text{M}+2]^+$

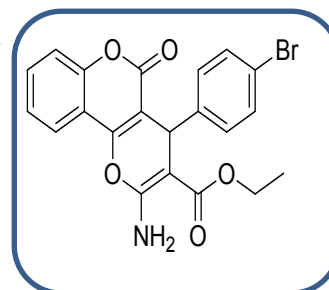

# $^1\text{H}$ NMR of 7a

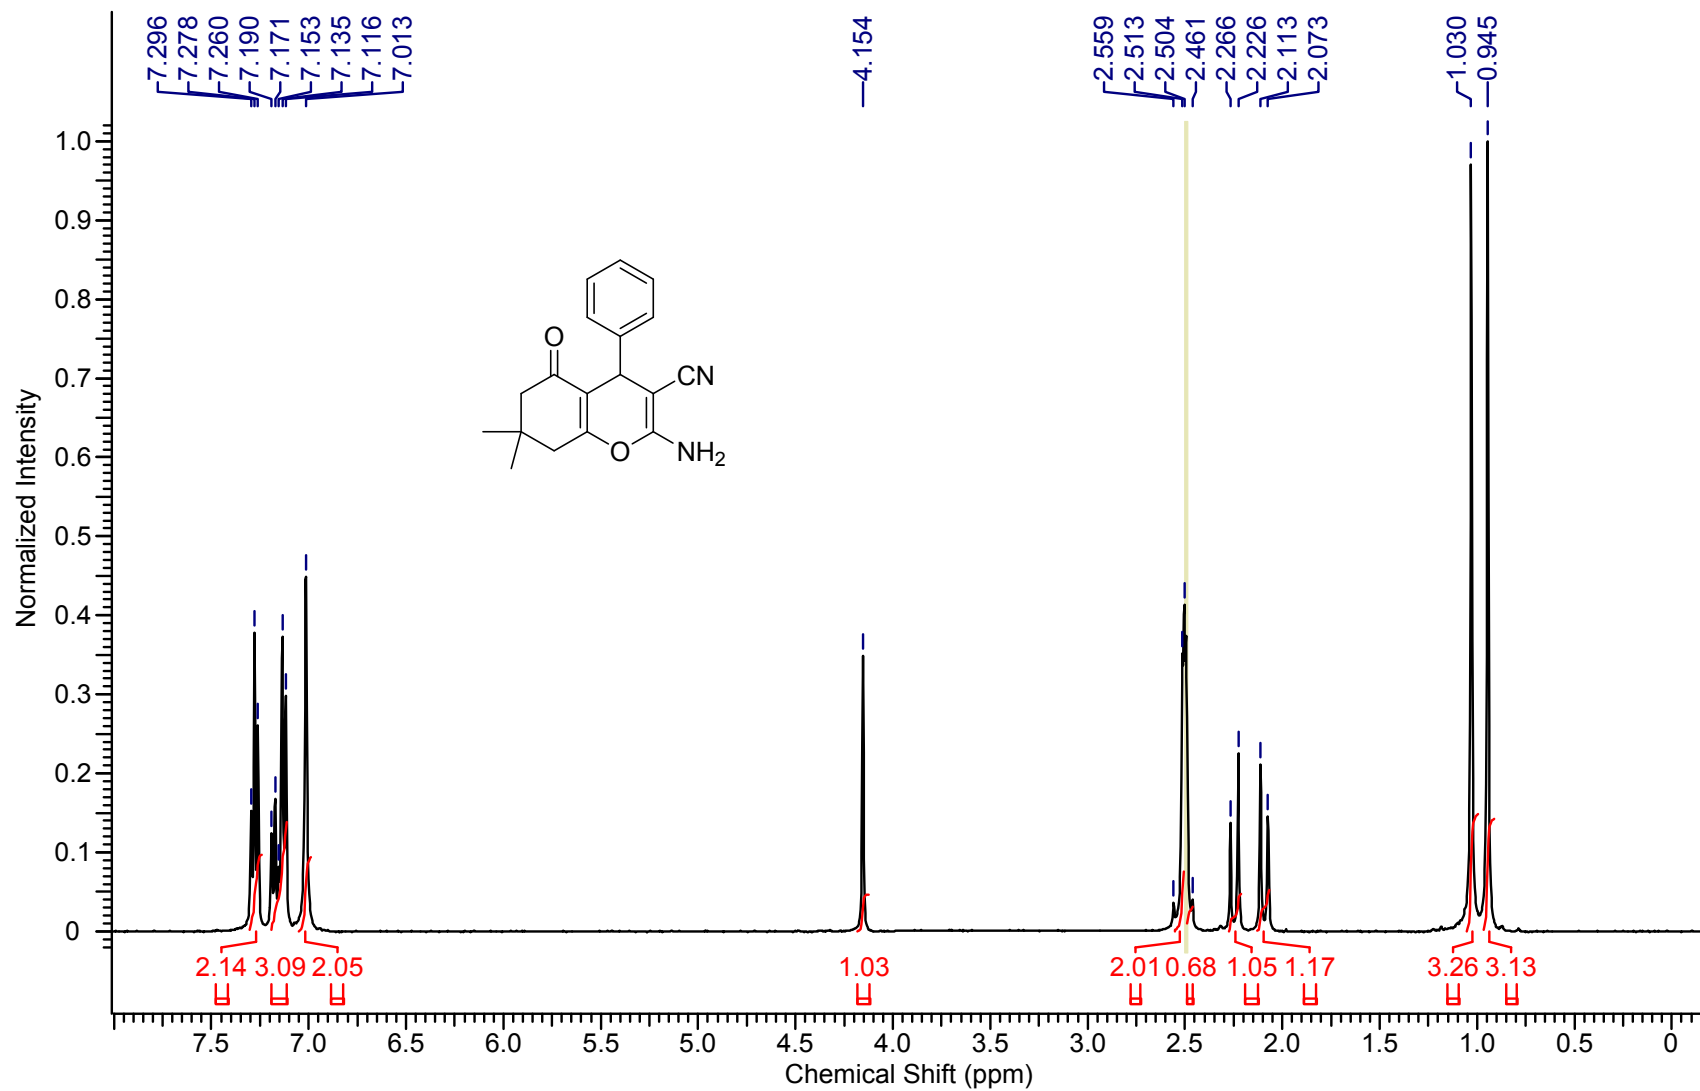

# <sup>13</sup>C NMR of 7a

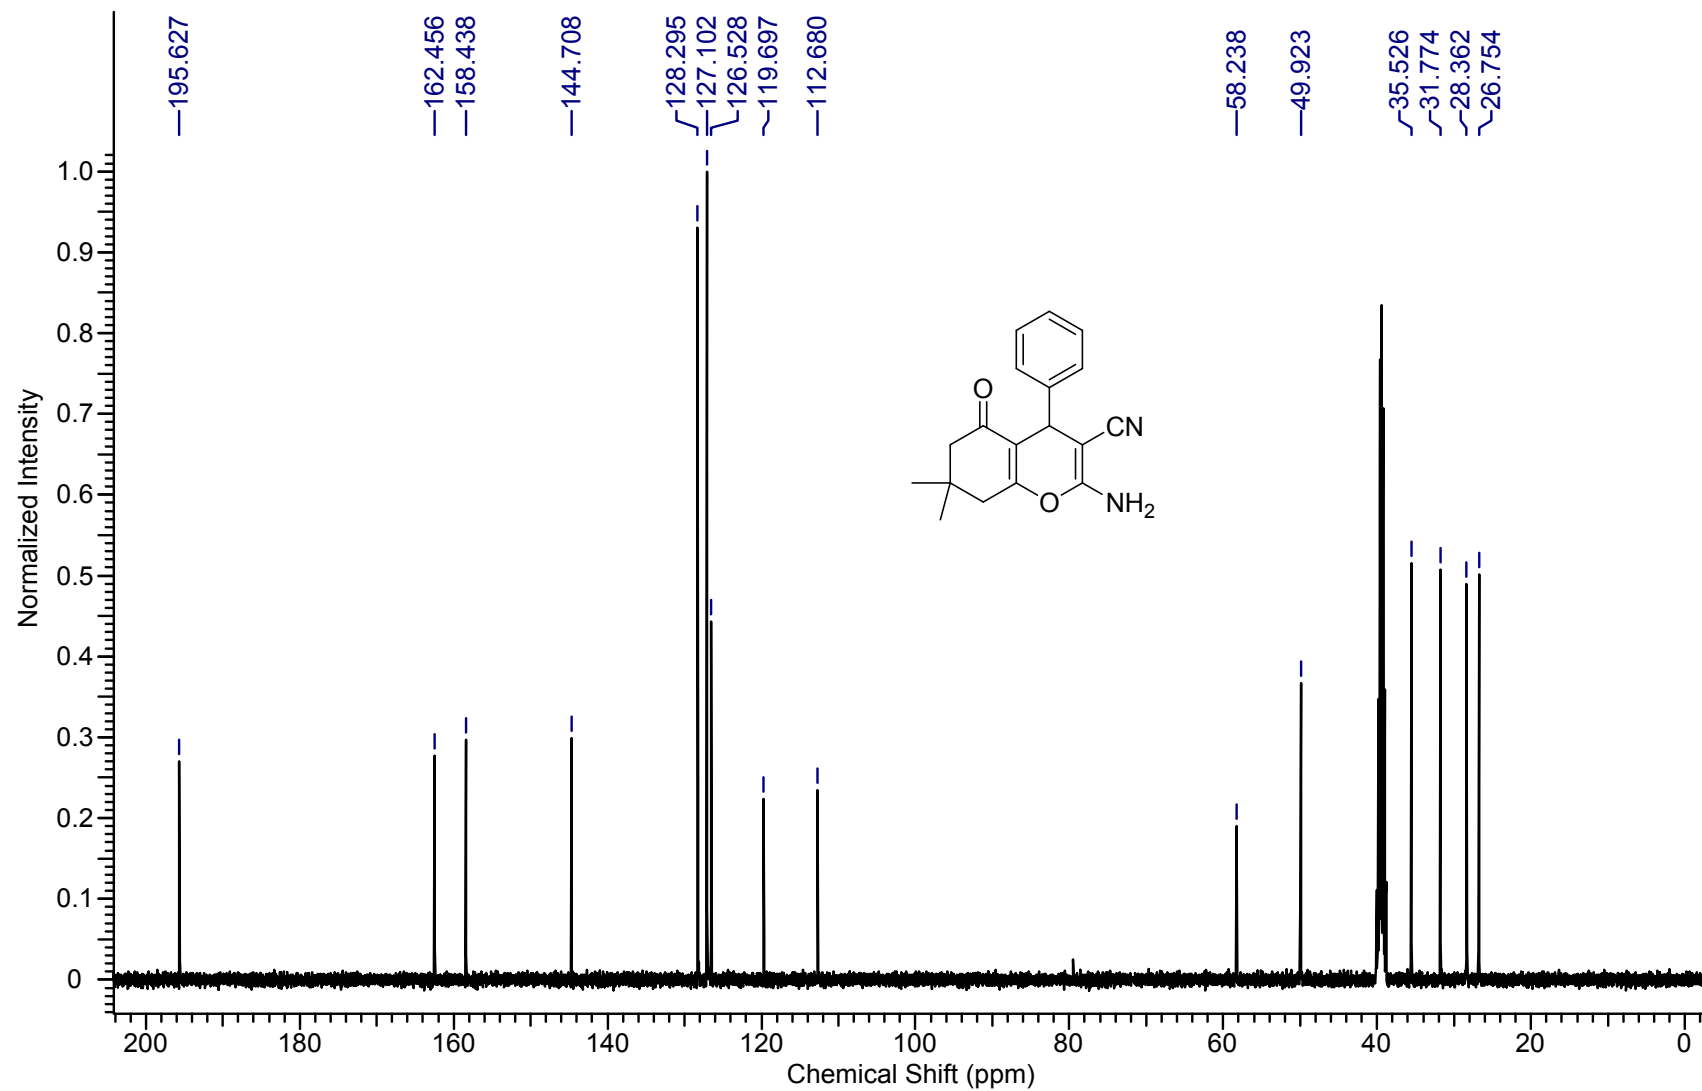

# $^1\text{H}$ NMR of 7b

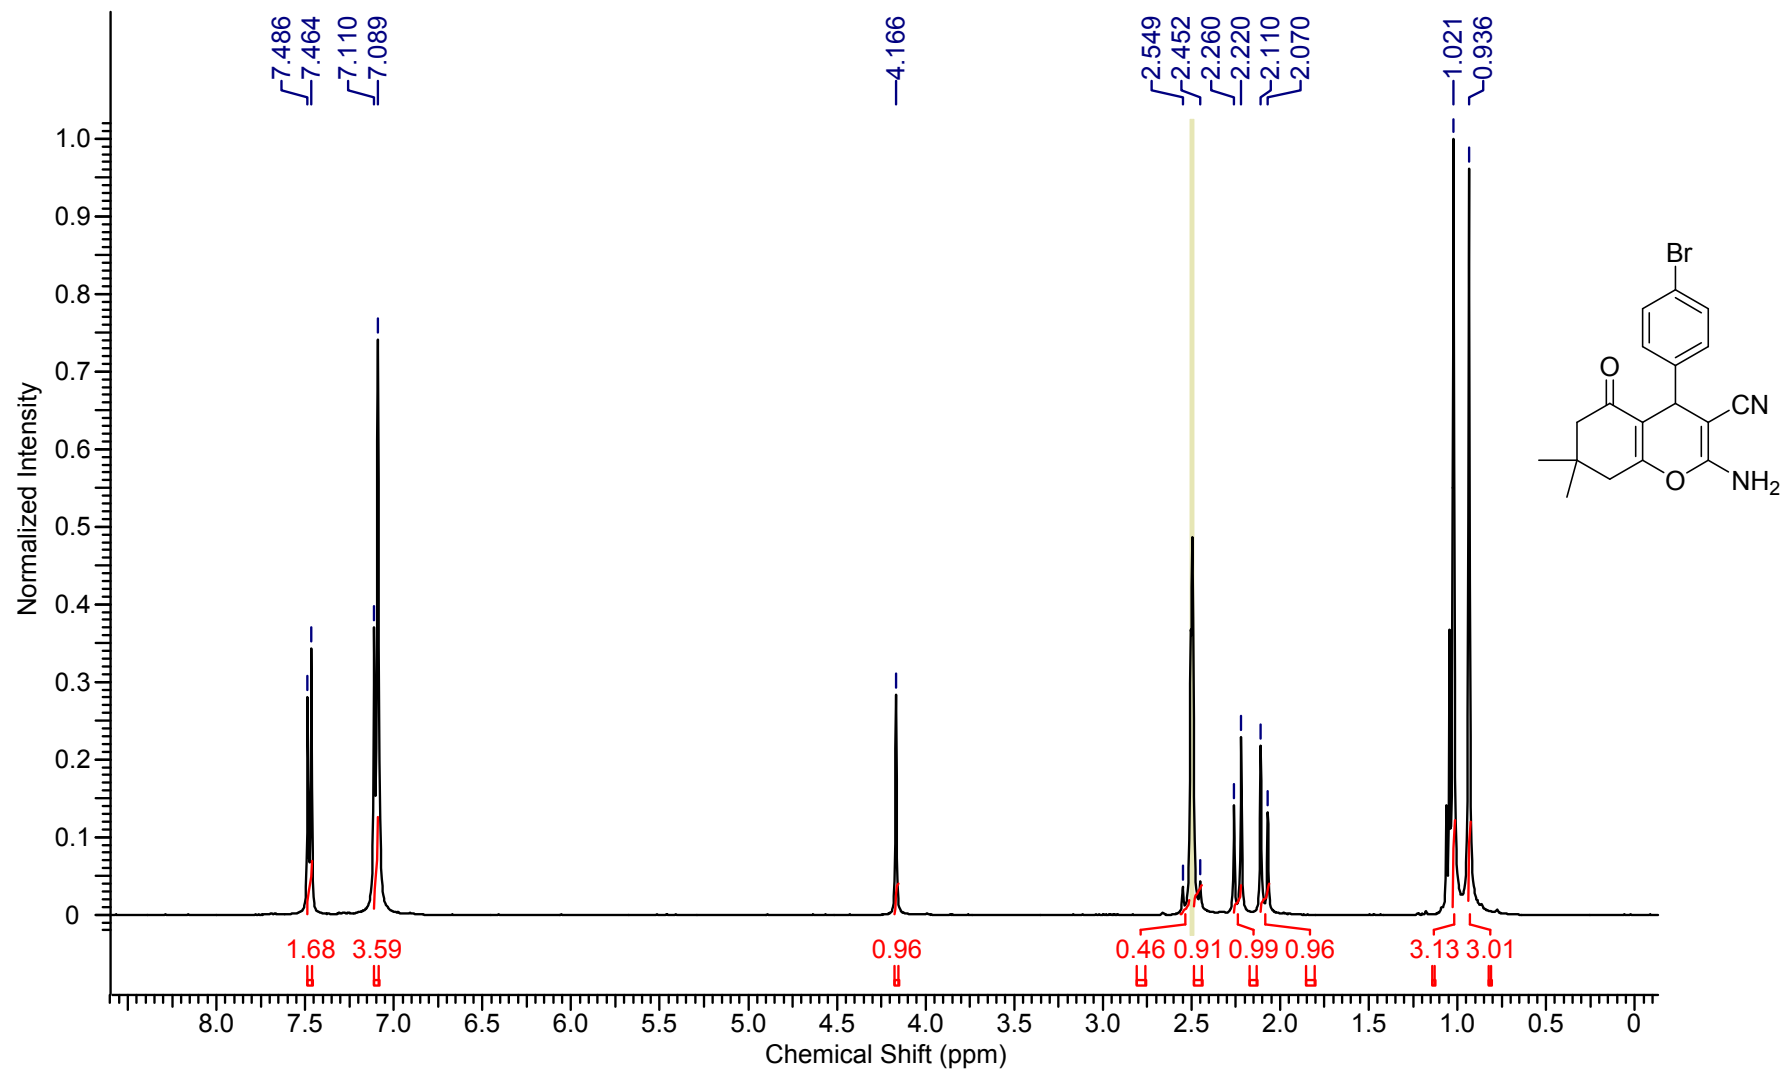

# <sup>13</sup>C NMR of 7b

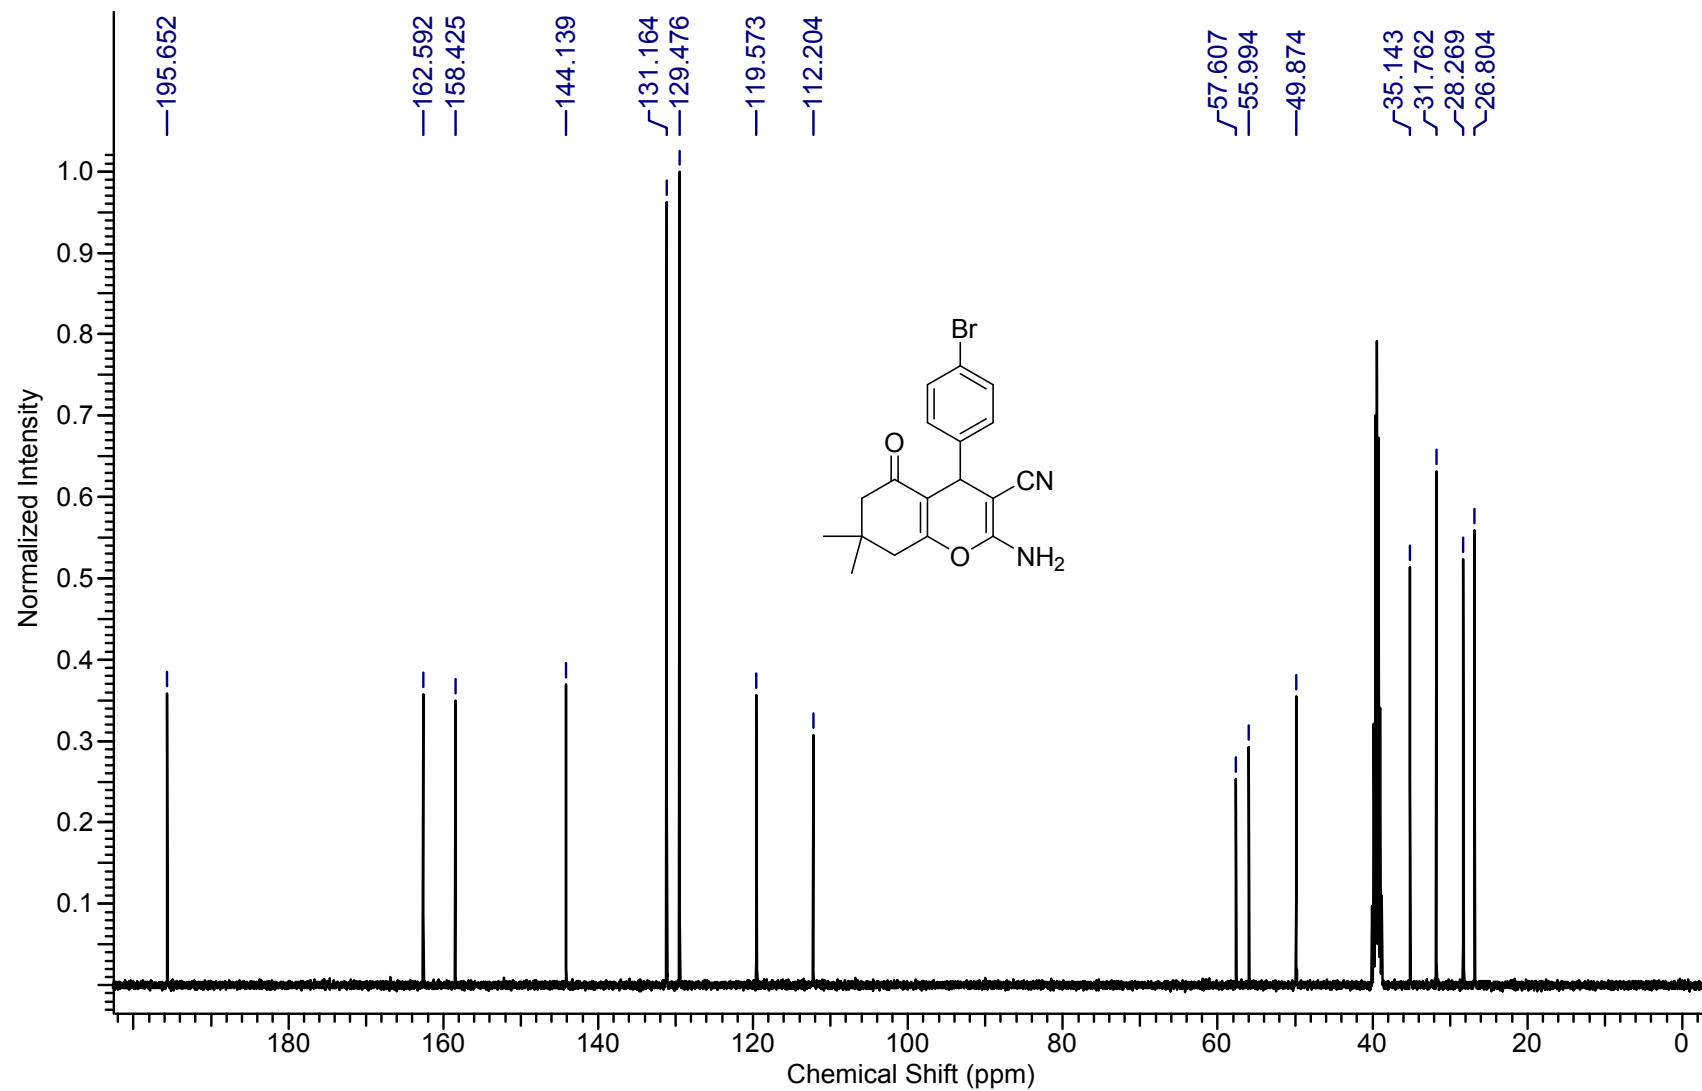



# $^1\text{H}$ NMR of 7c

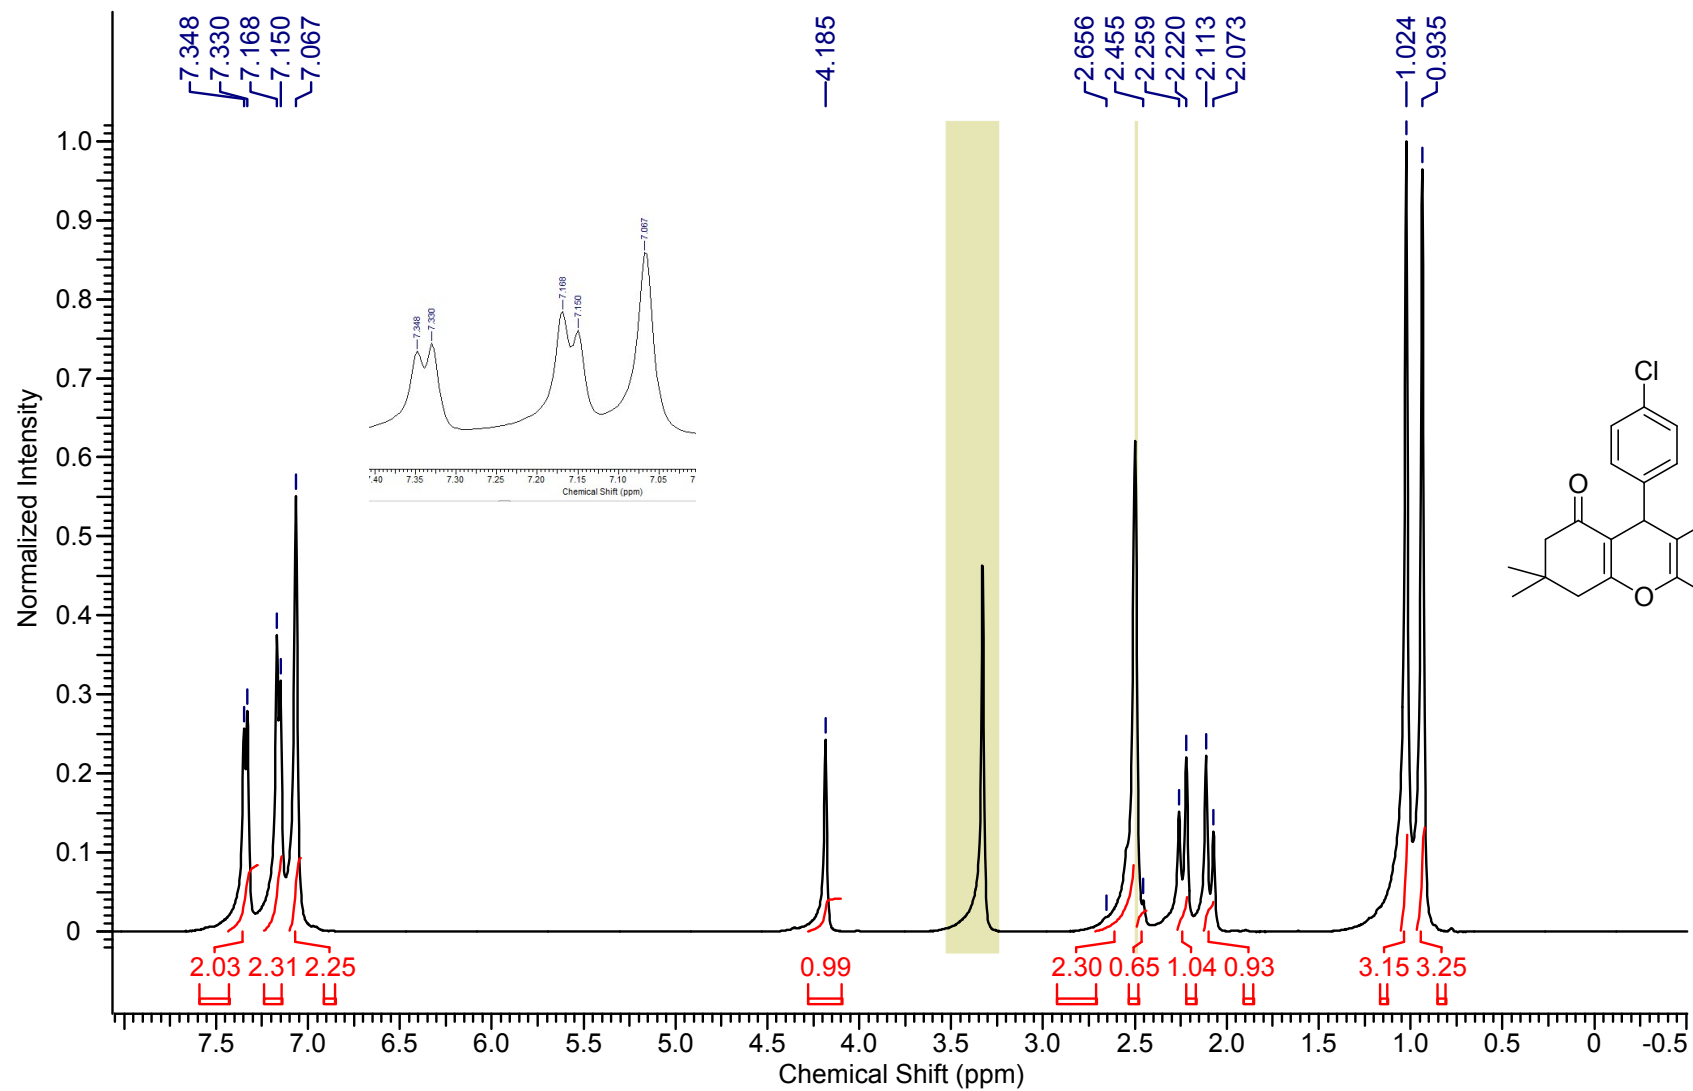

# <sup>13</sup>C NMR of 7c

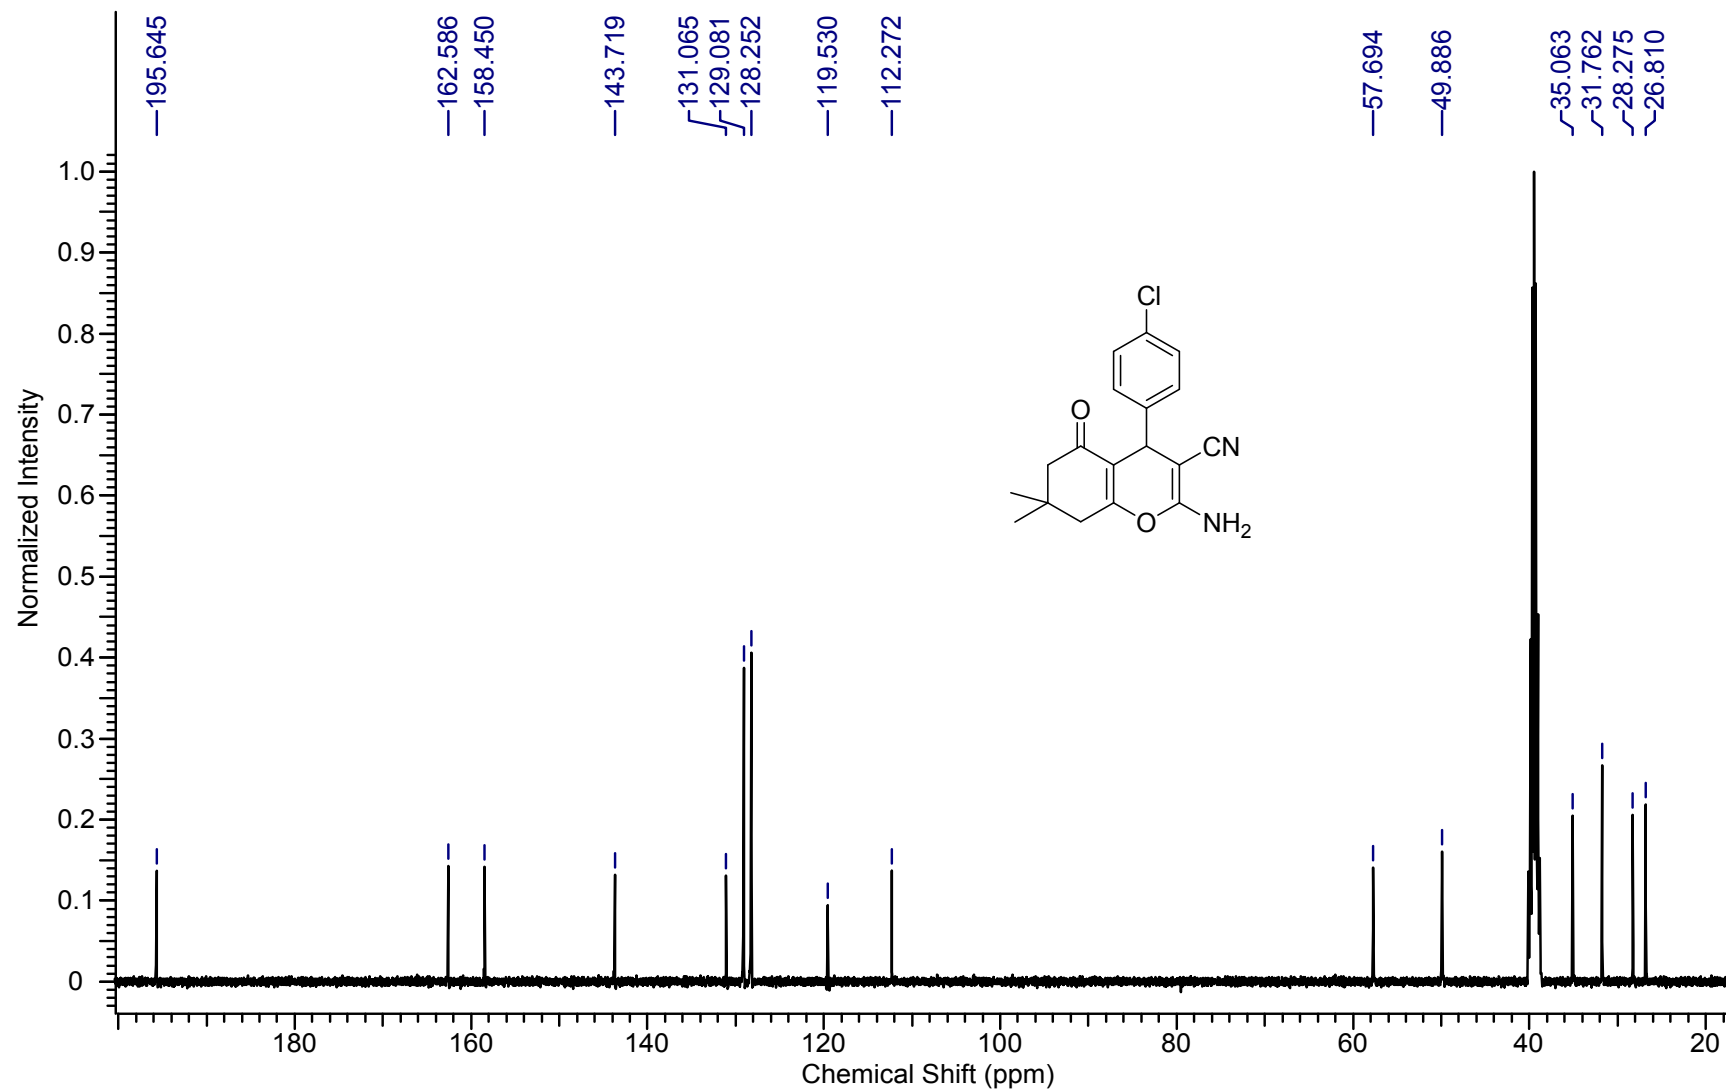

# $^1\text{H}$ NMR of 7e

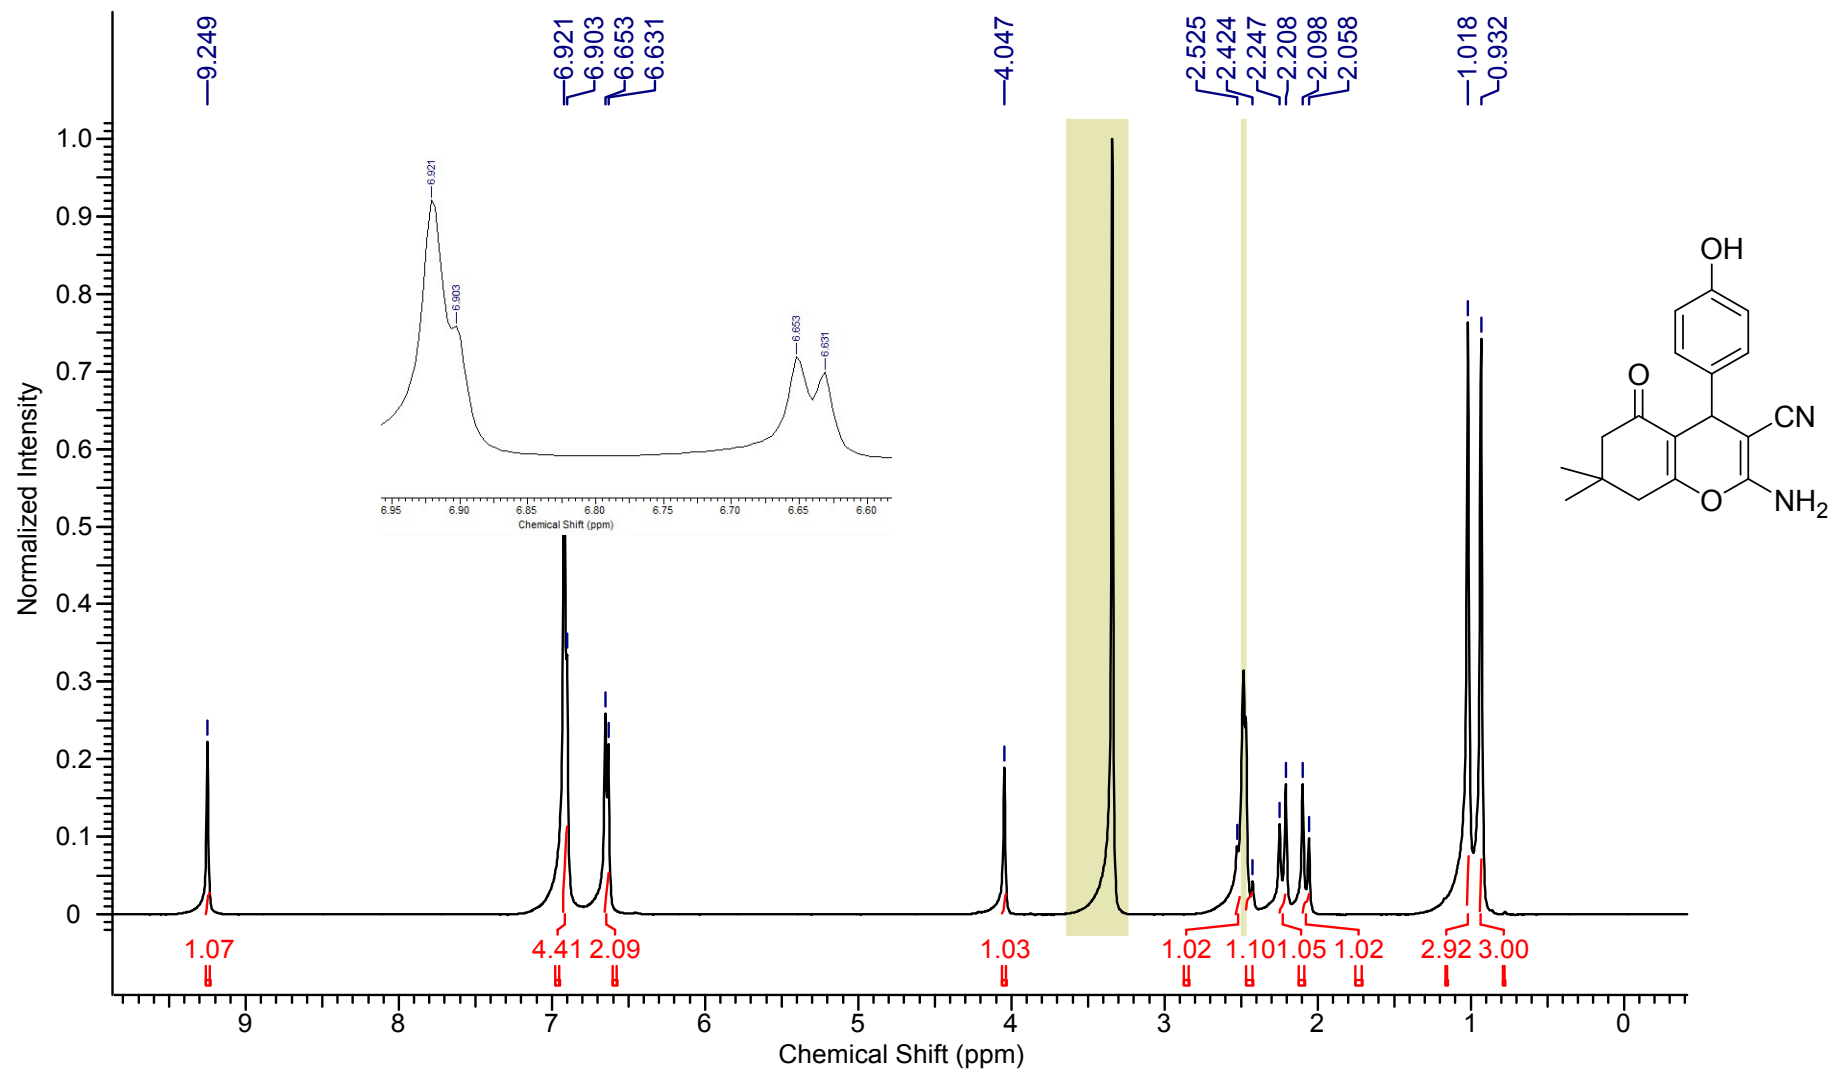

# <sup>13</sup>C NMR of 7e

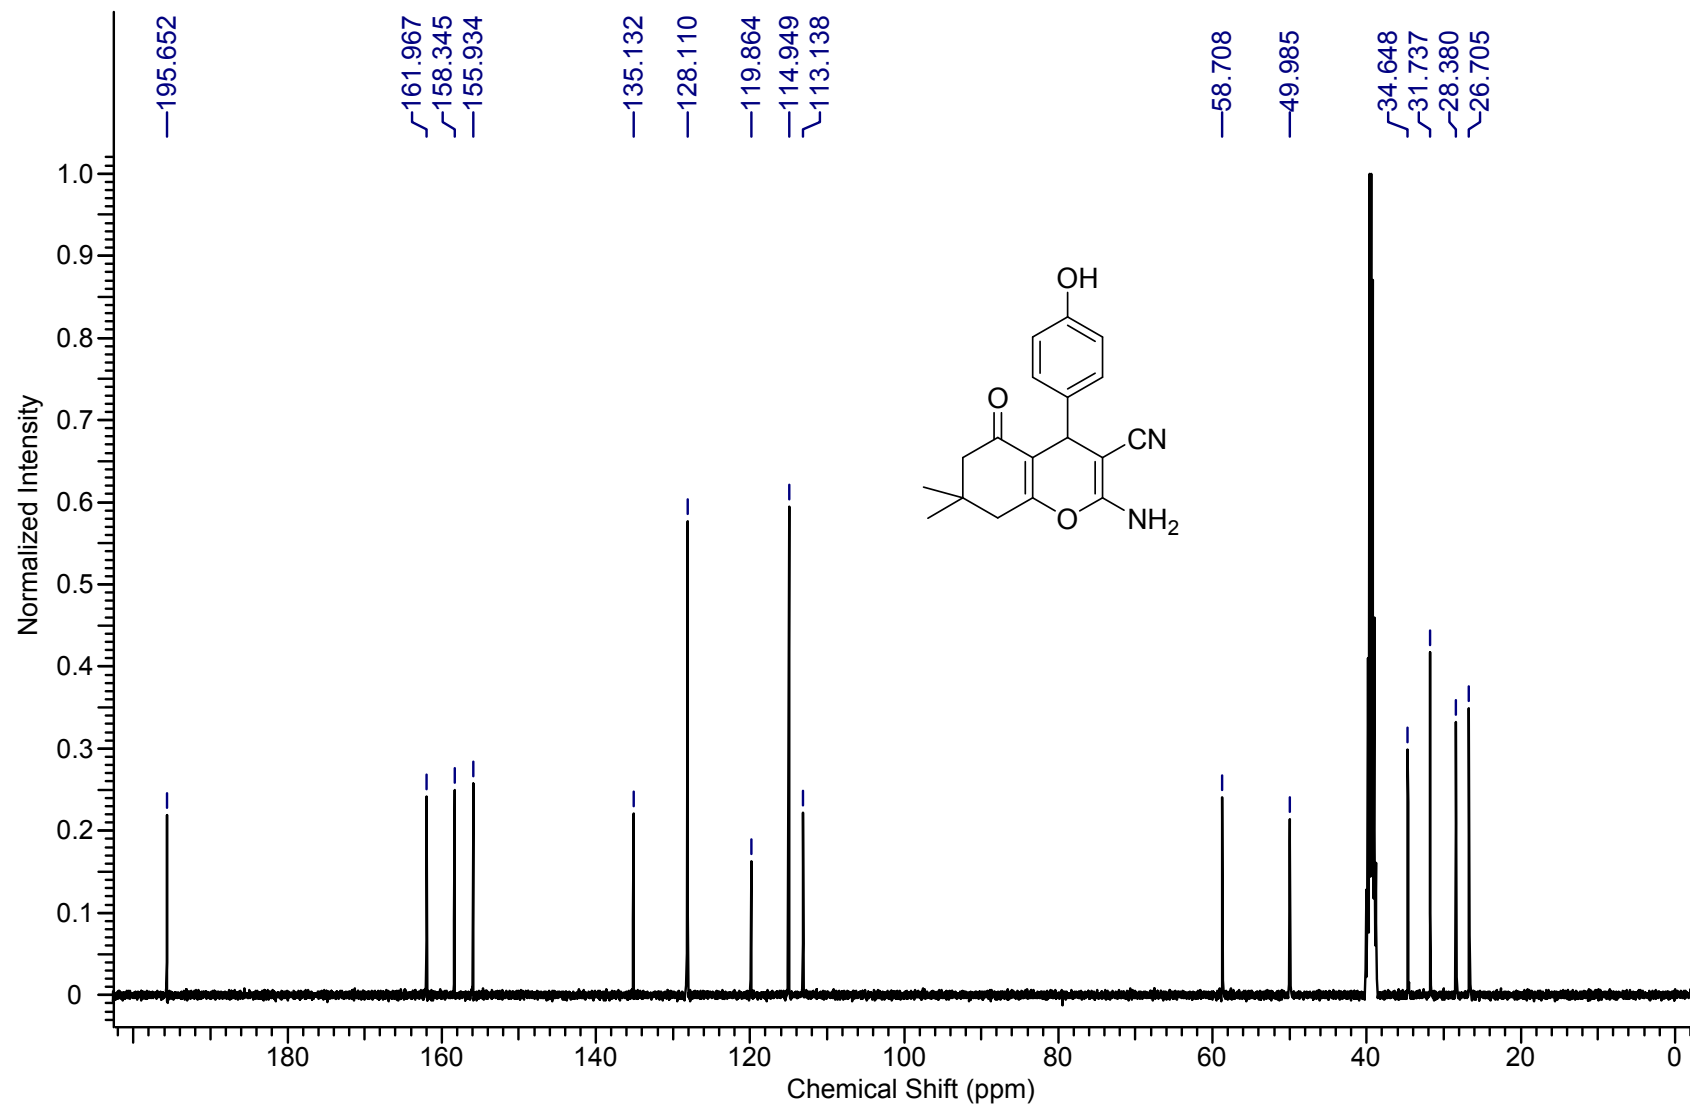

# $^1\text{H}$ NMR of 7f ( $\text{CDCl}_3 + \text{DMSO-d}_6$ )

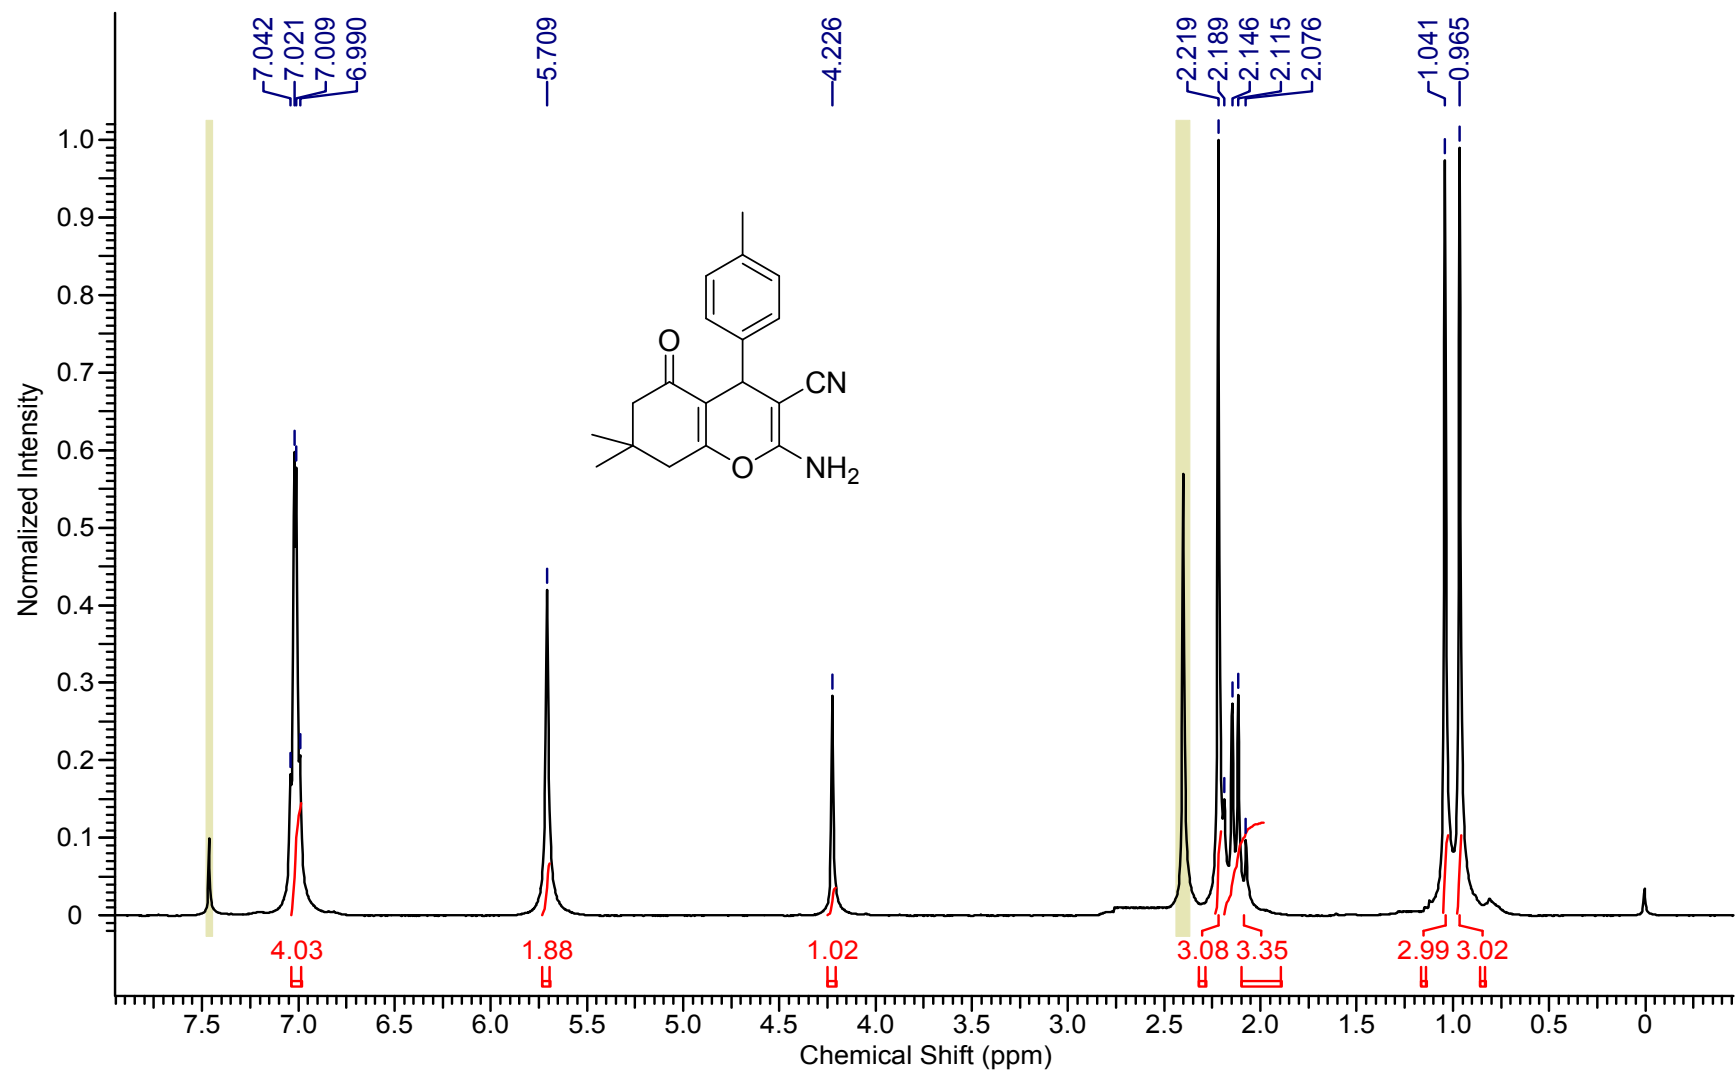

# $^{13}\text{C}$ NMR of 7f (CDCl<sub>3</sub>+DMSO<sub>d</sub><sub>6</sub>)

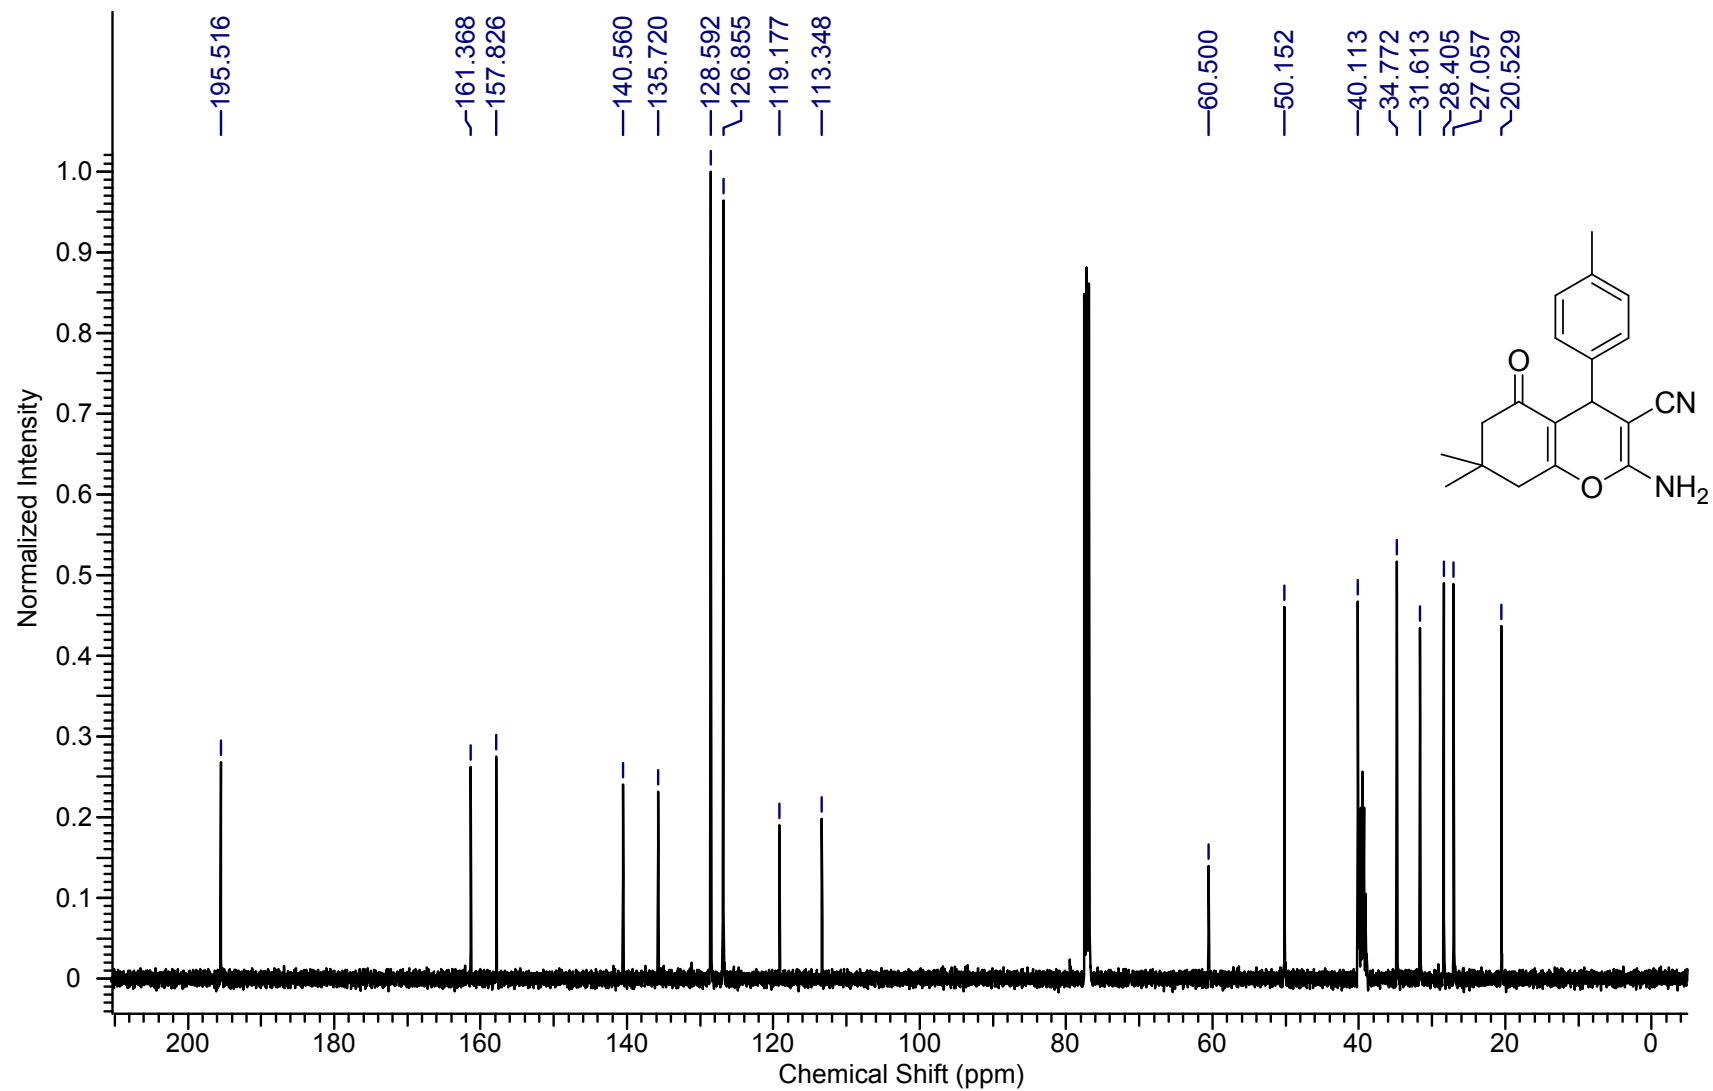

# $^1\text{H}$ NMR of 7g

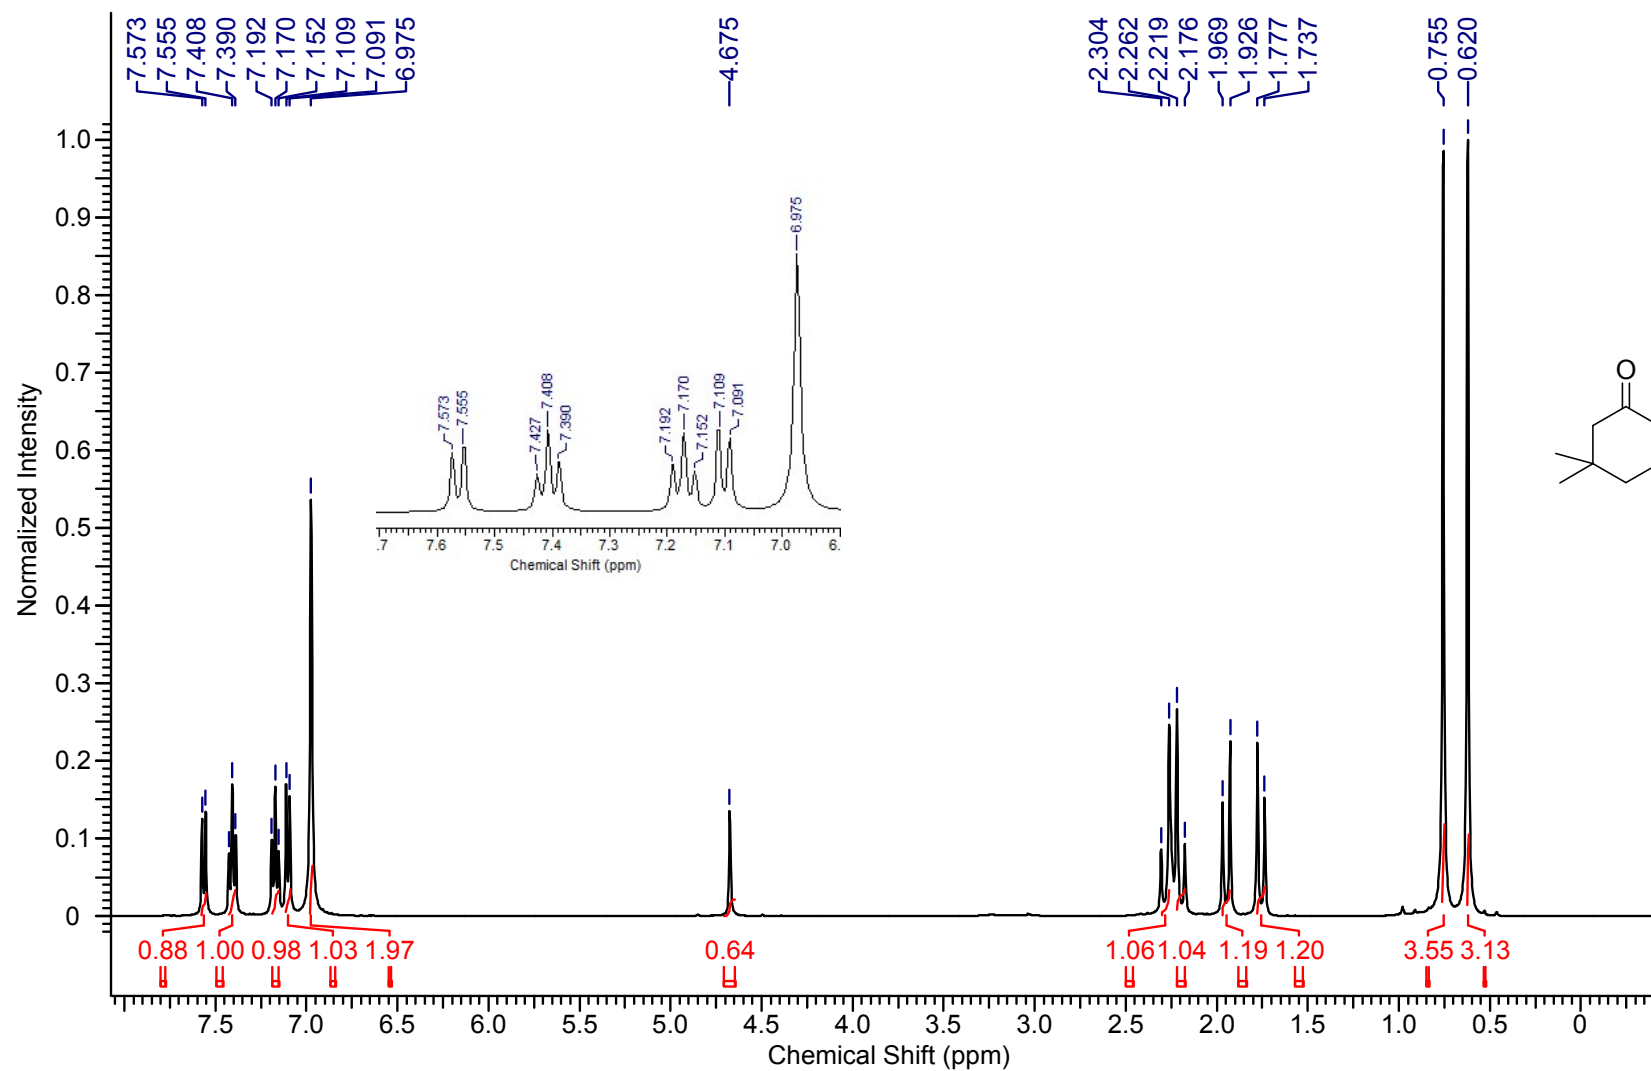

# <sup>13</sup>C NMR of 7g

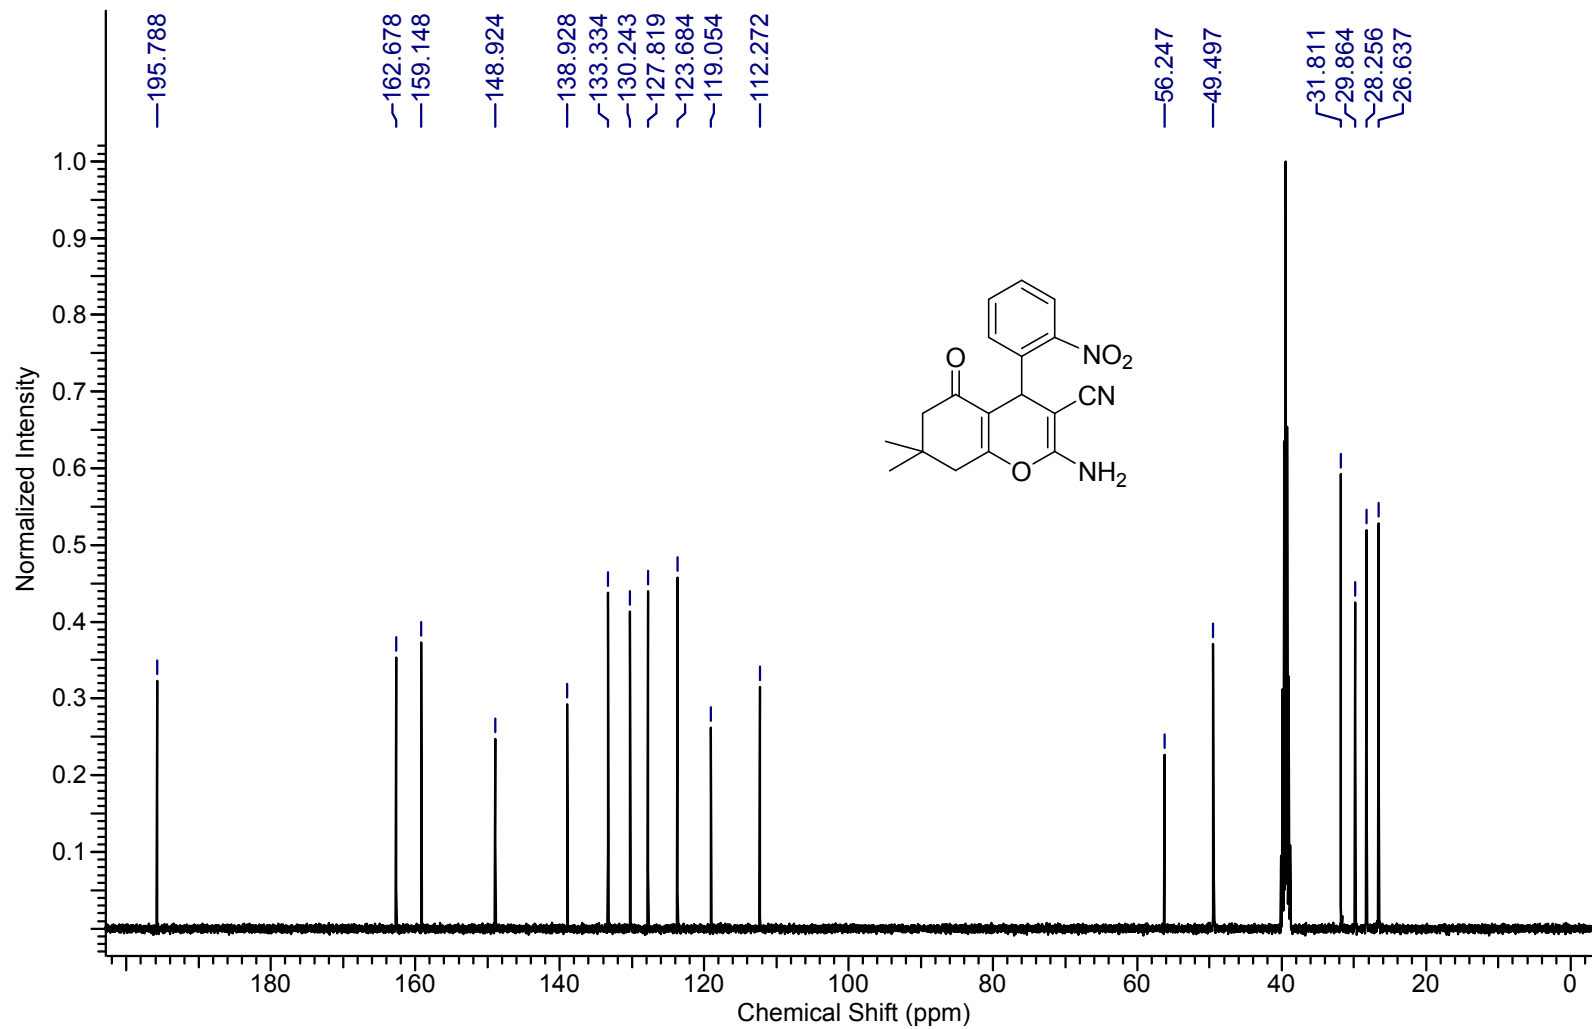



# $^1\text{H}$ NMR of 7h

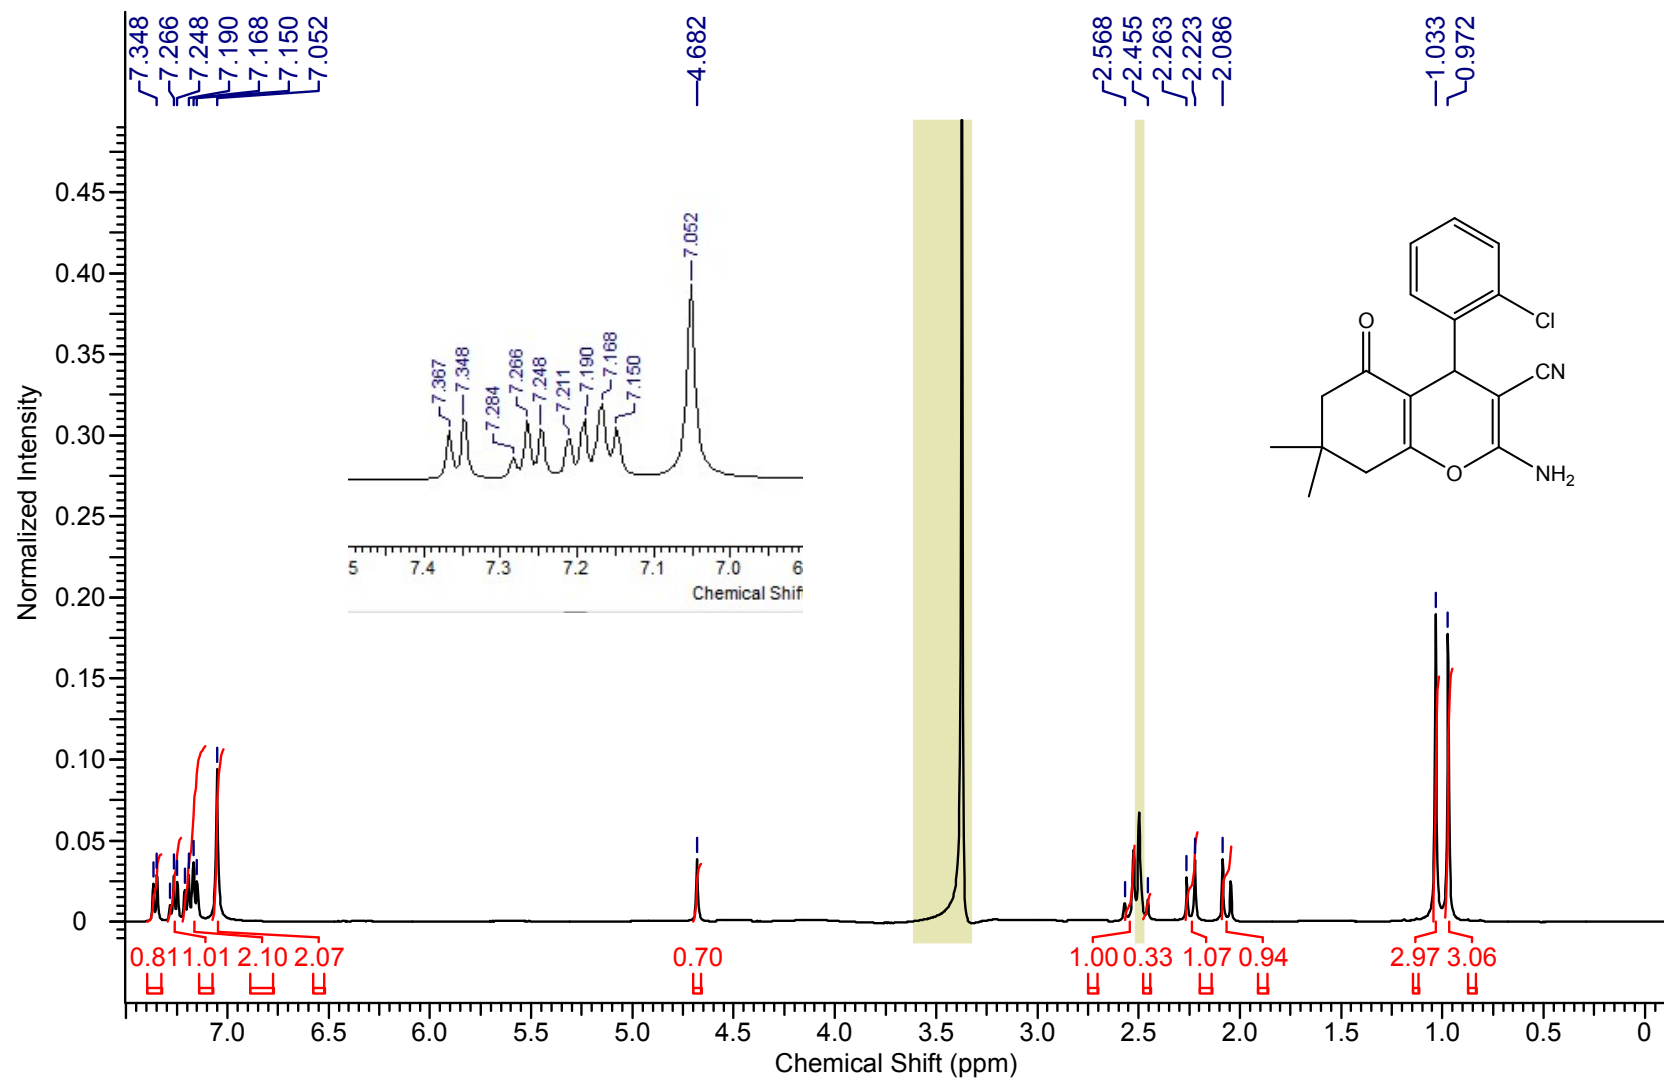

# <sup>13</sup>C NMR of 7h

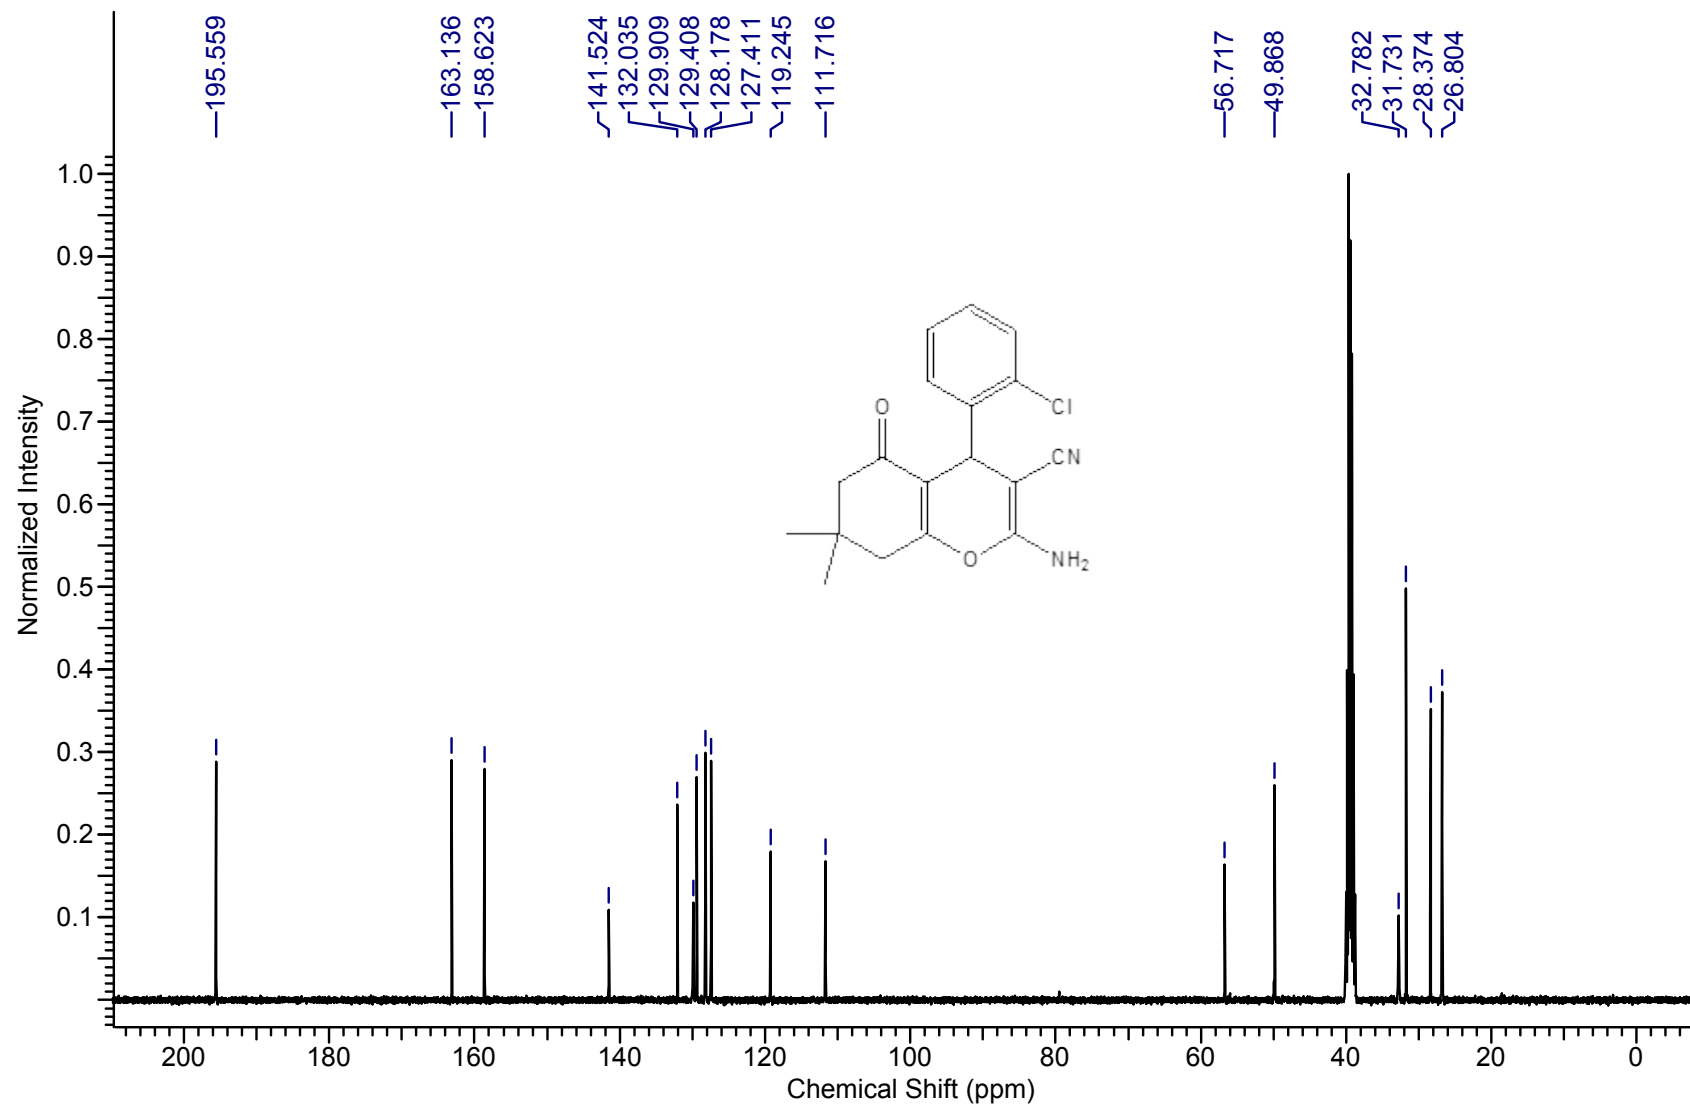

# $^1\text{H}$ NMR of 7j

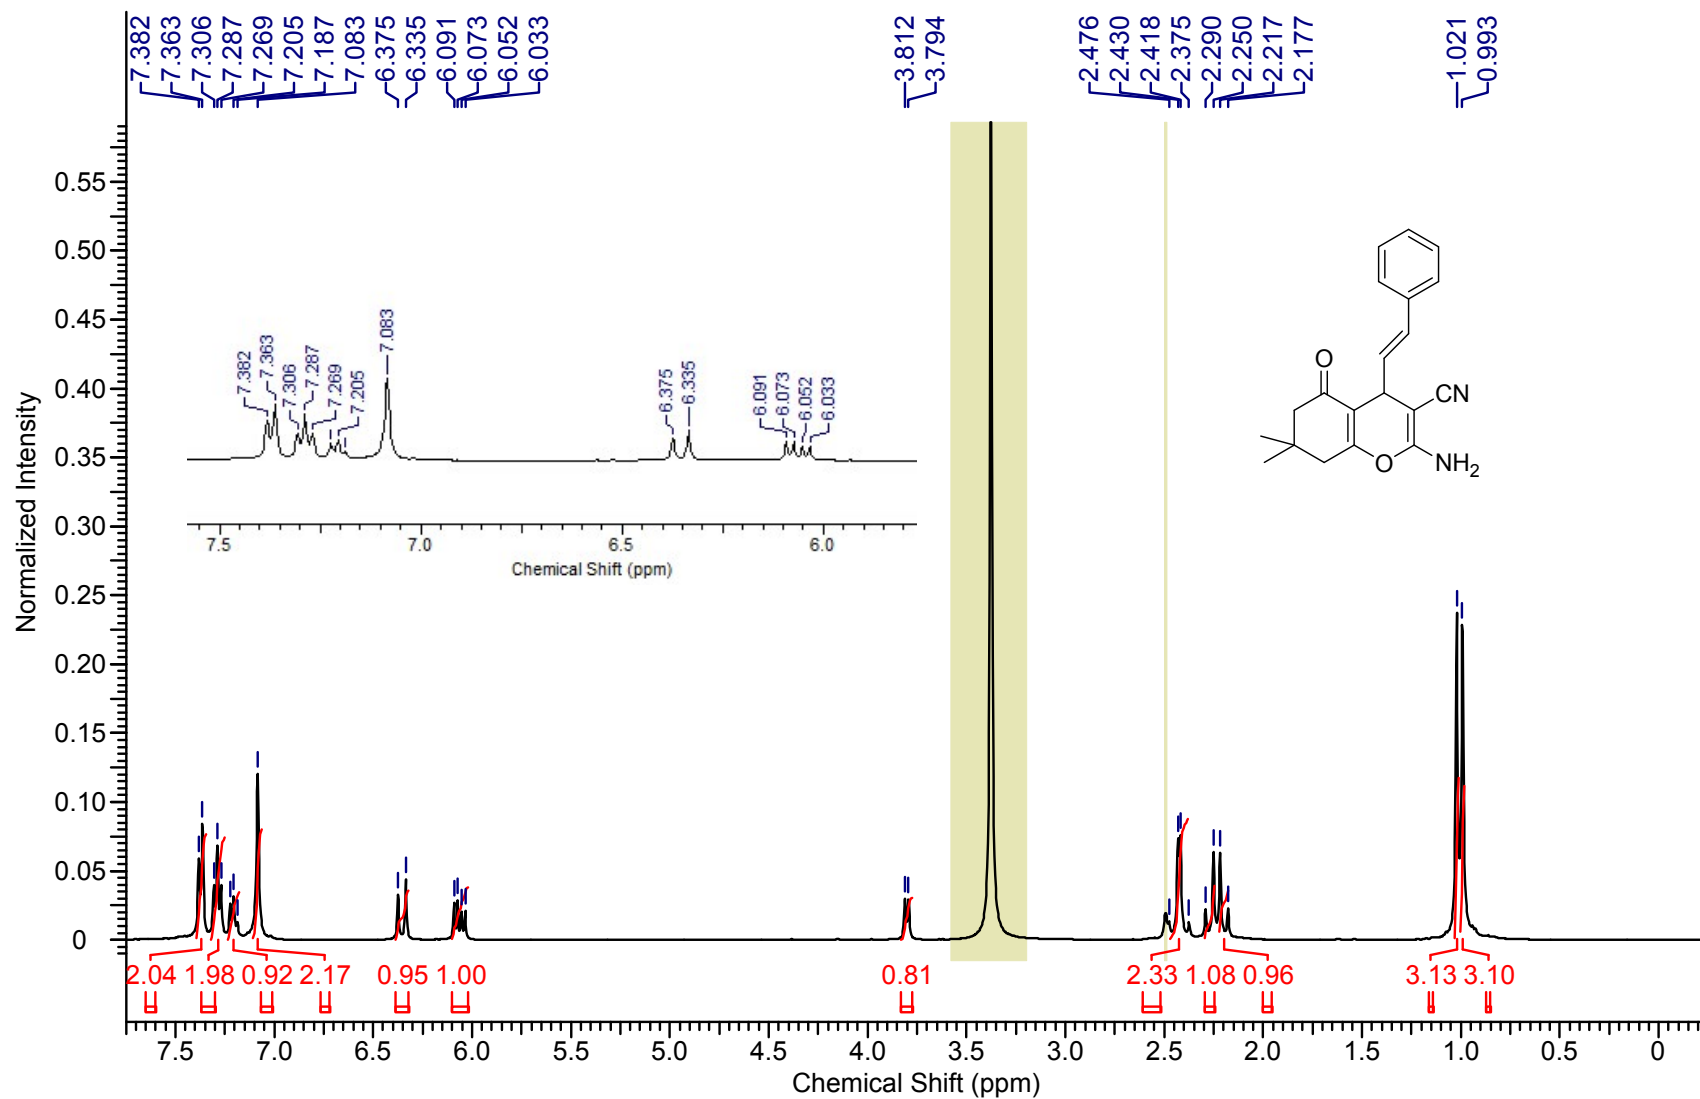

# <sup>13</sup>C NMR of 7j

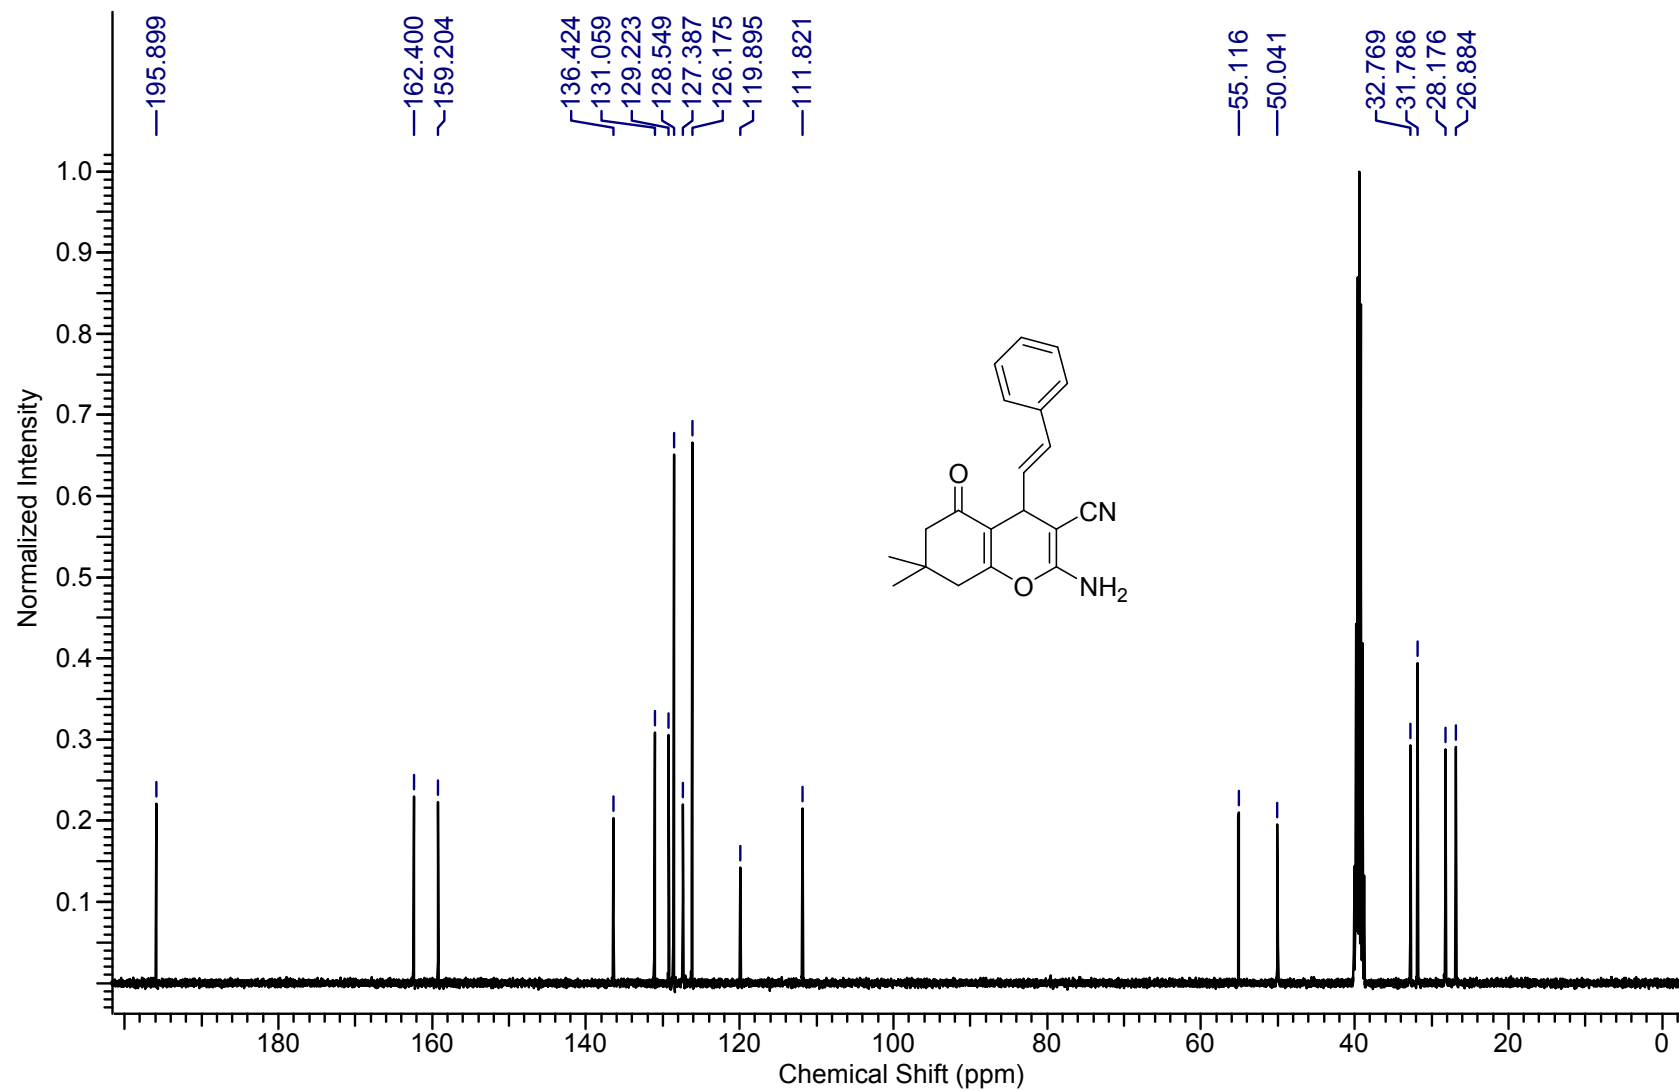

# $^1\text{H}$ NMR of 8a

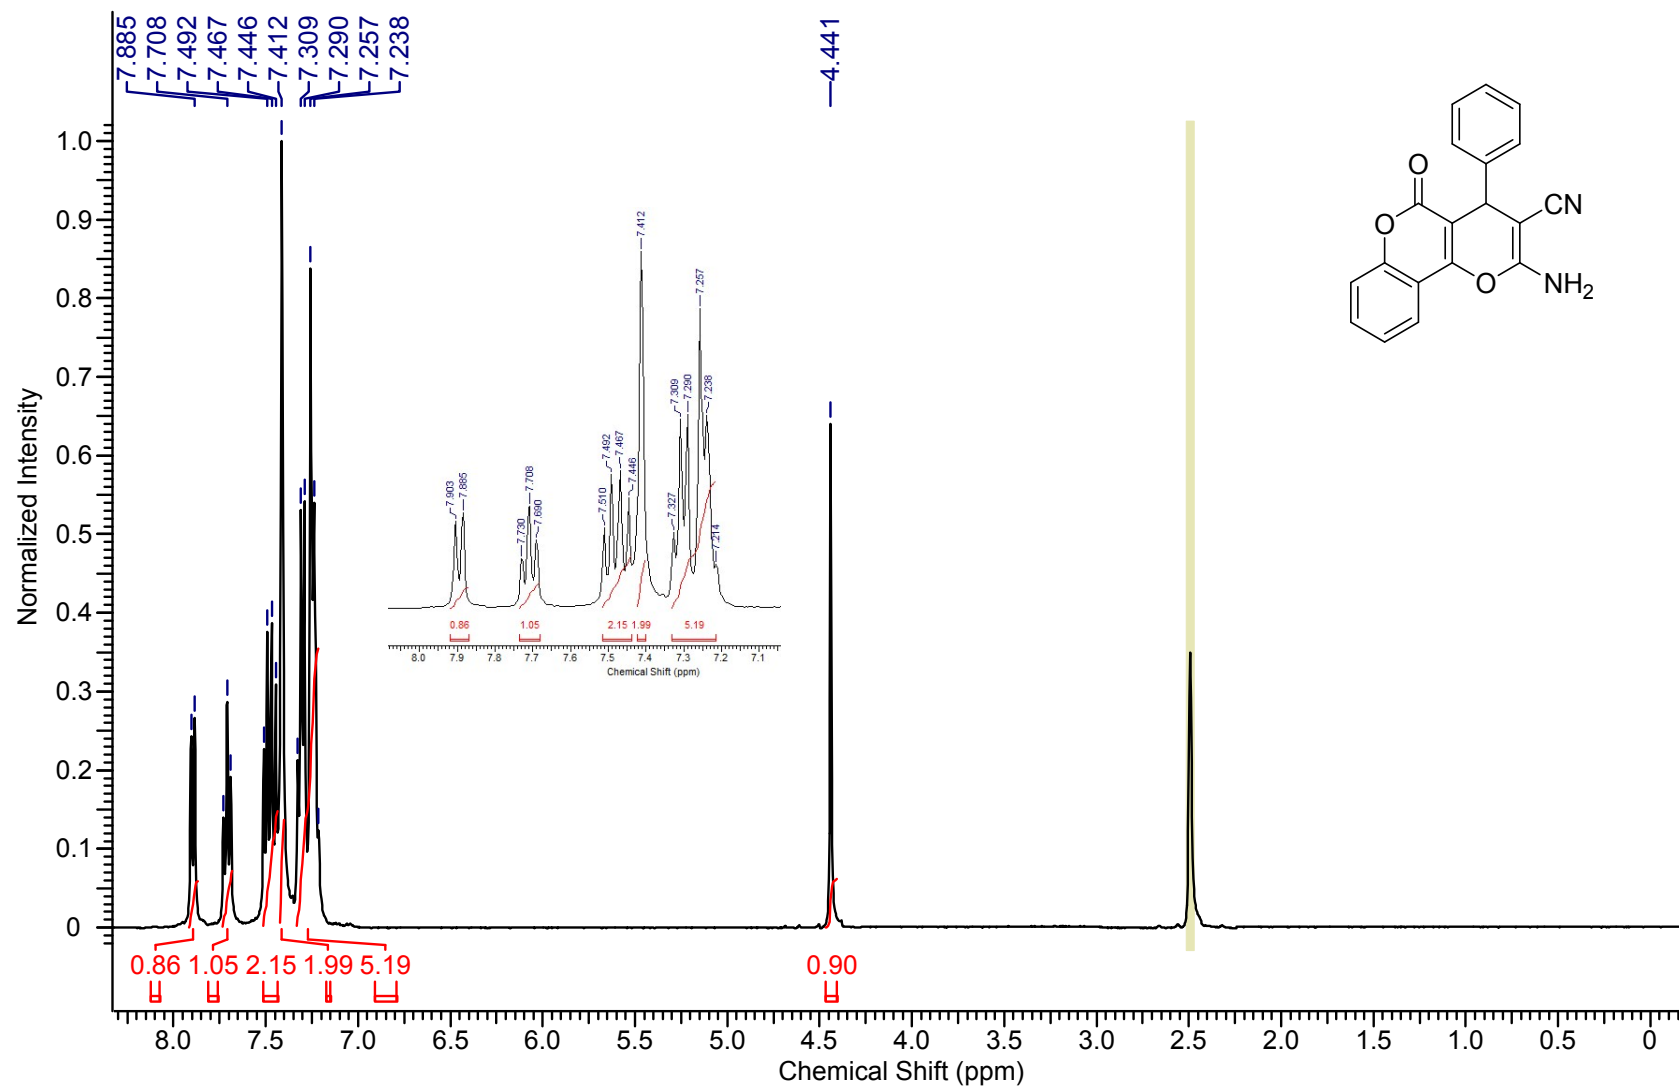

# <sup>13</sup>C NMR of 8a

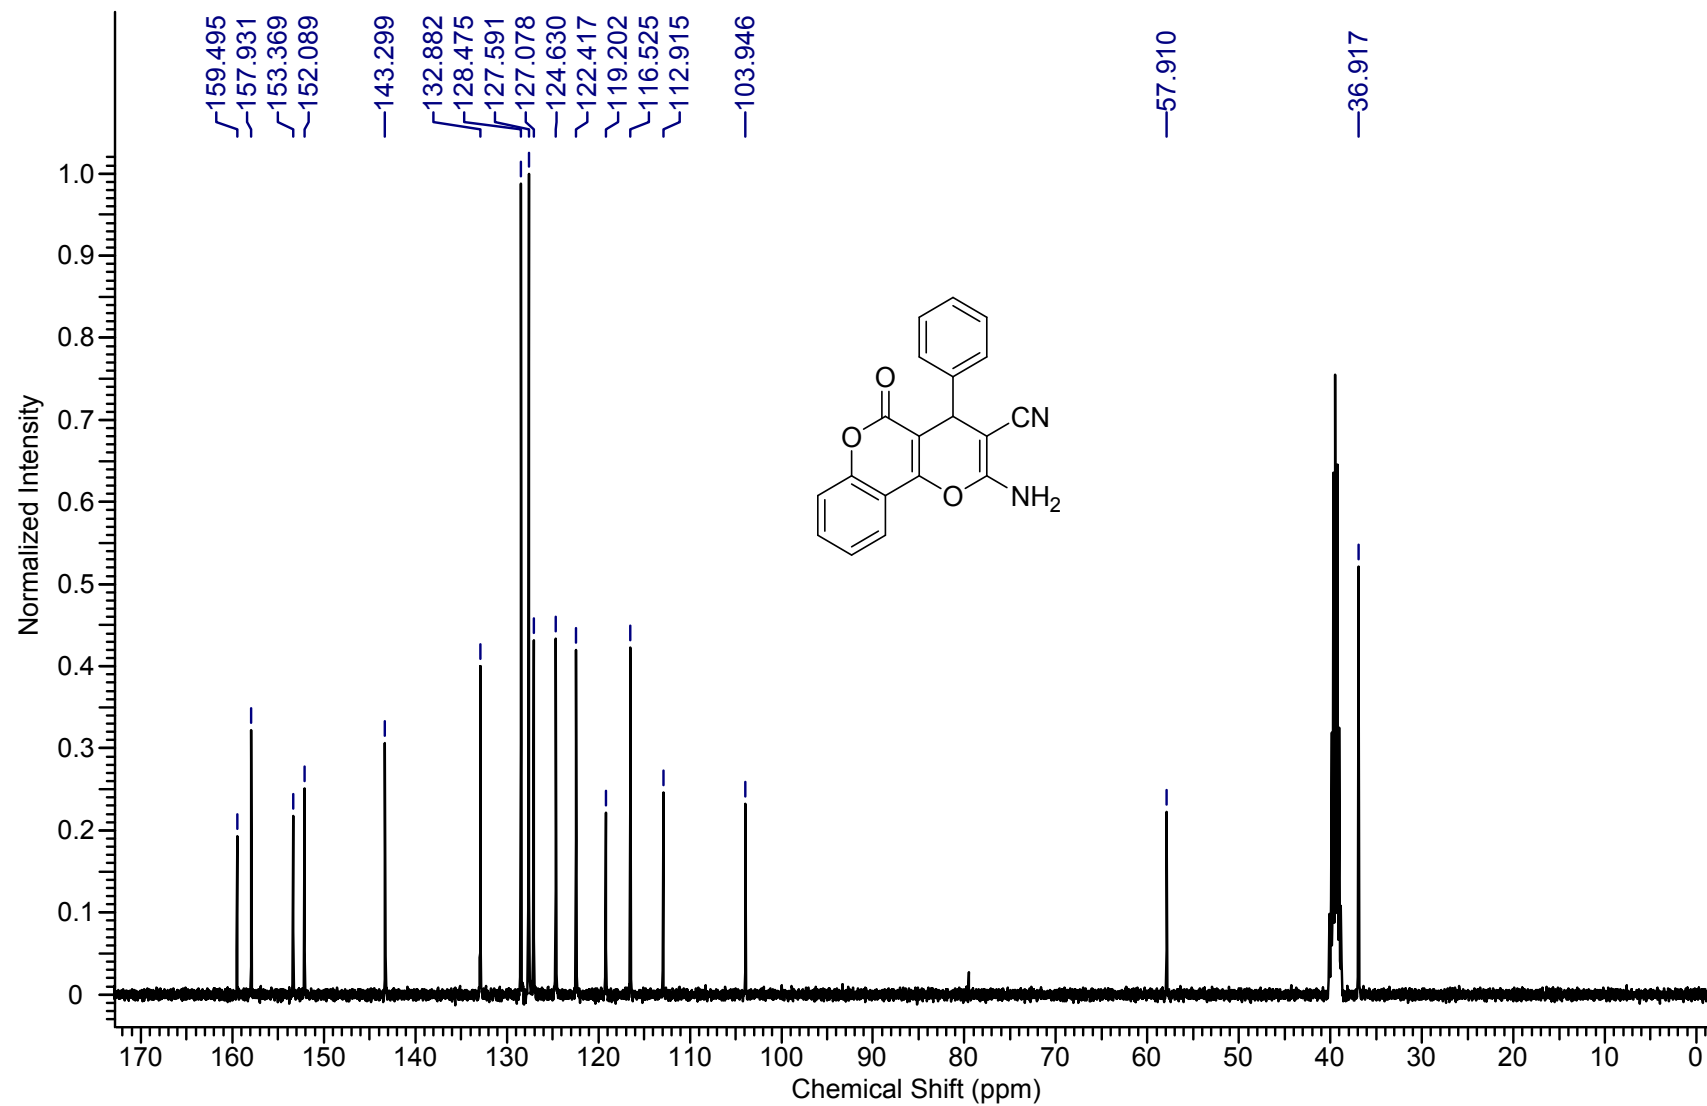

# <sup>1</sup>H NMR of 8b

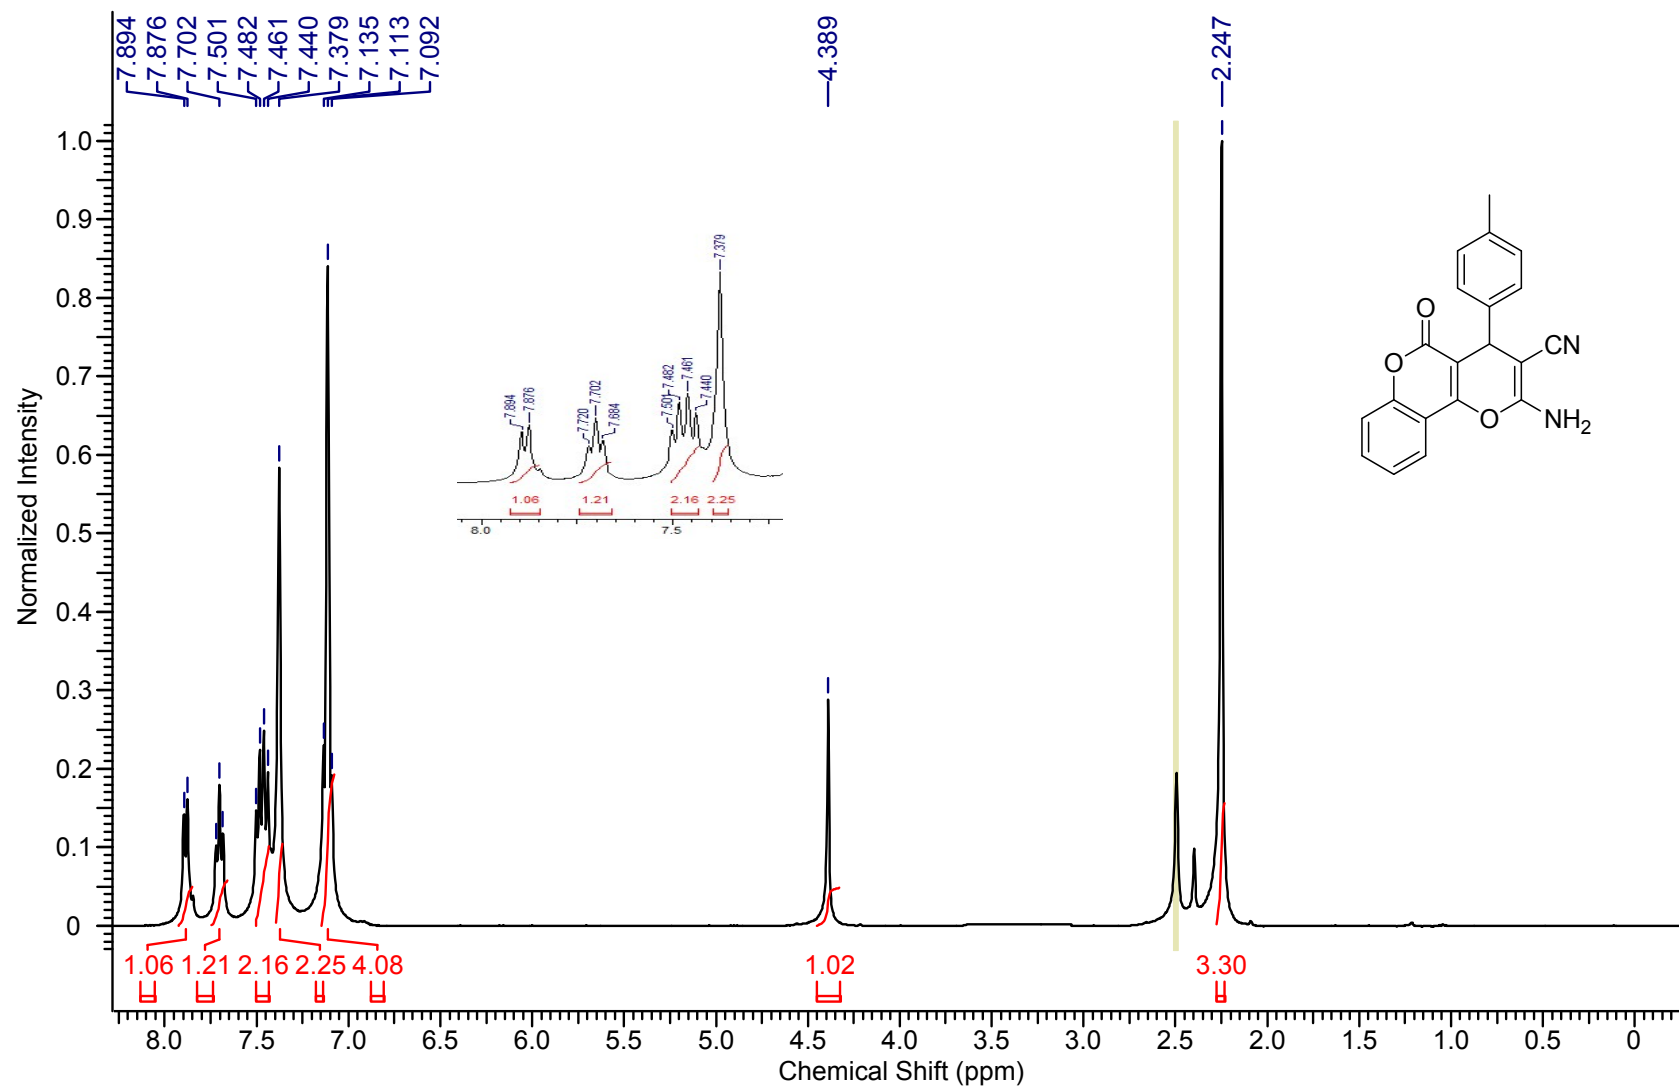

# <sup>13</sup>C NMR of 8b

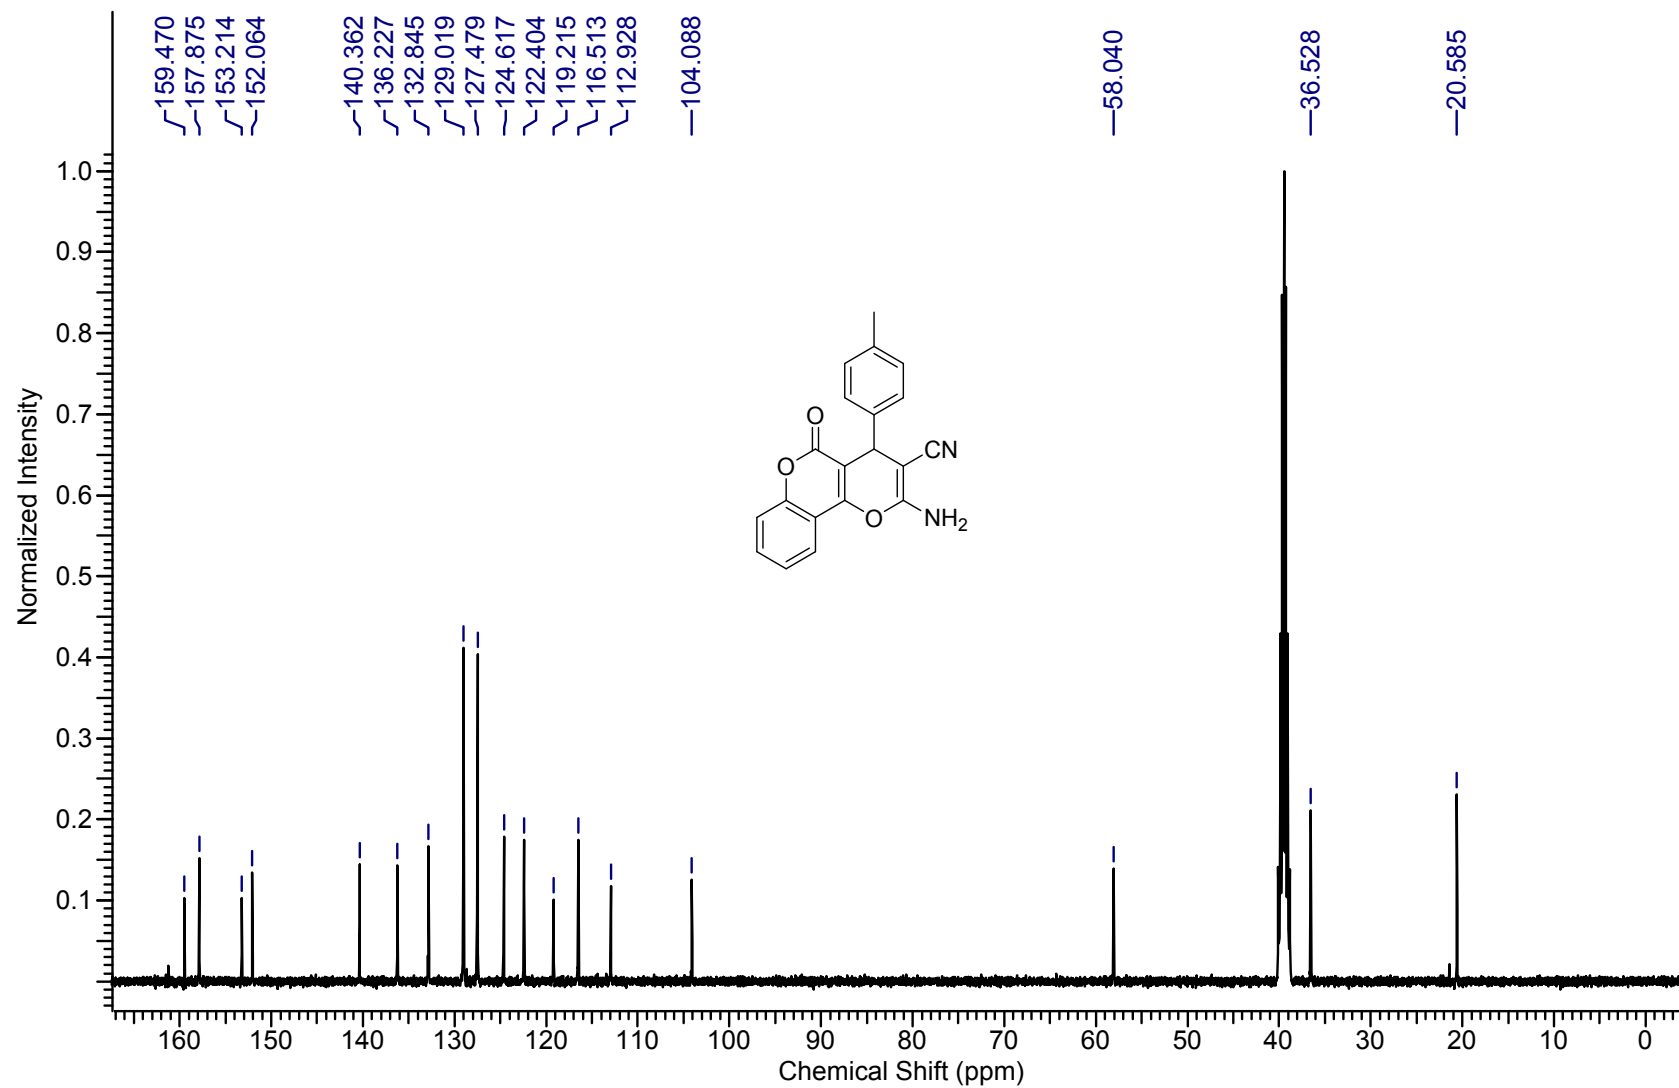



# <sup>1</sup>H NMR of 8c

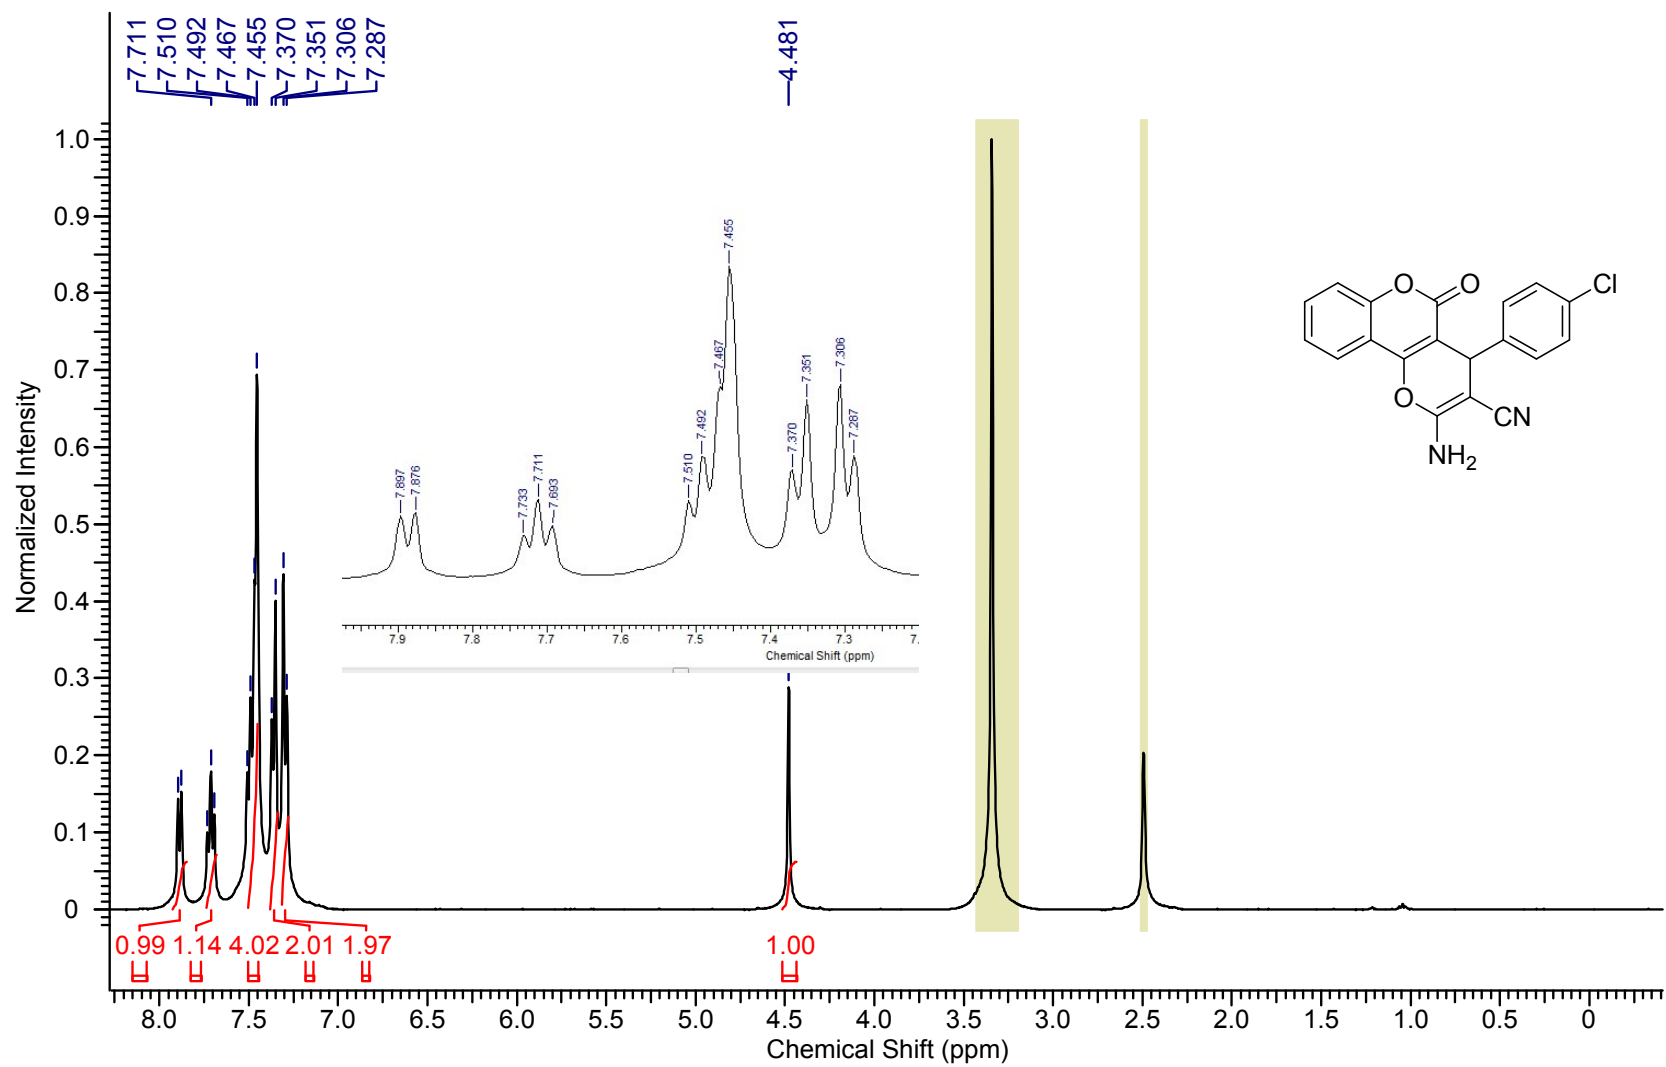

# <sup>13</sup>C NMR of 8c

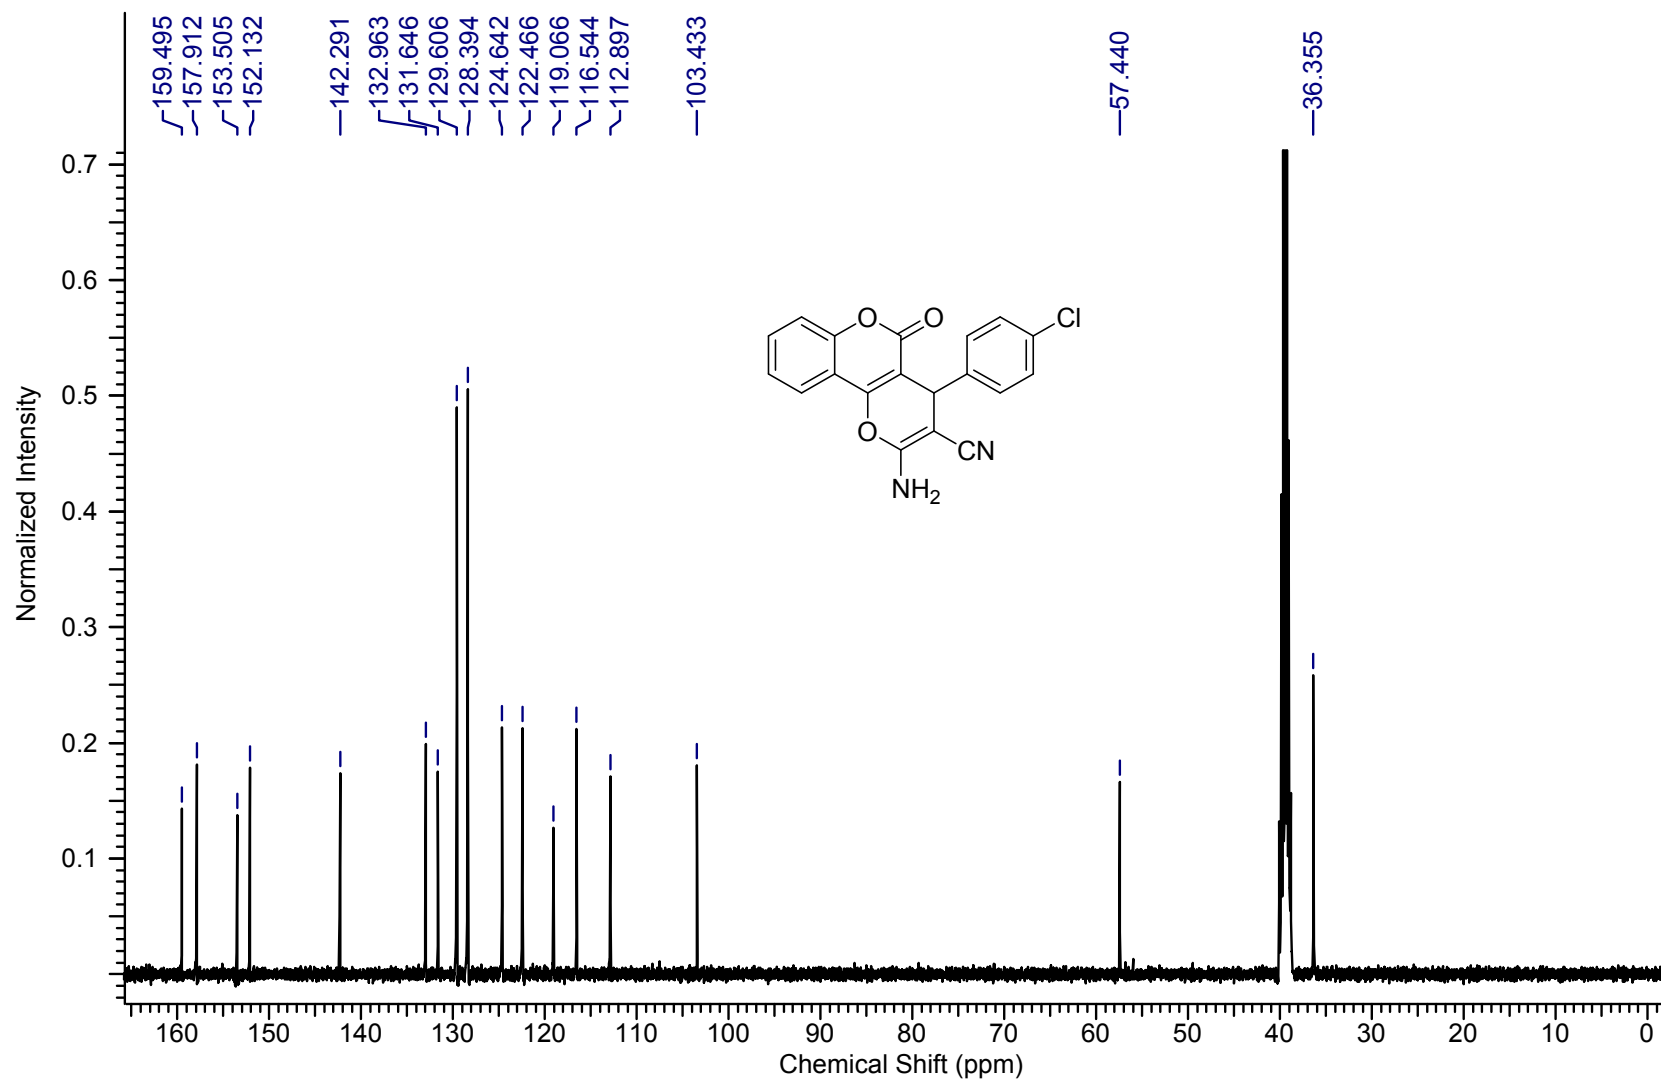

# <sup>1</sup>H NMR of 8d

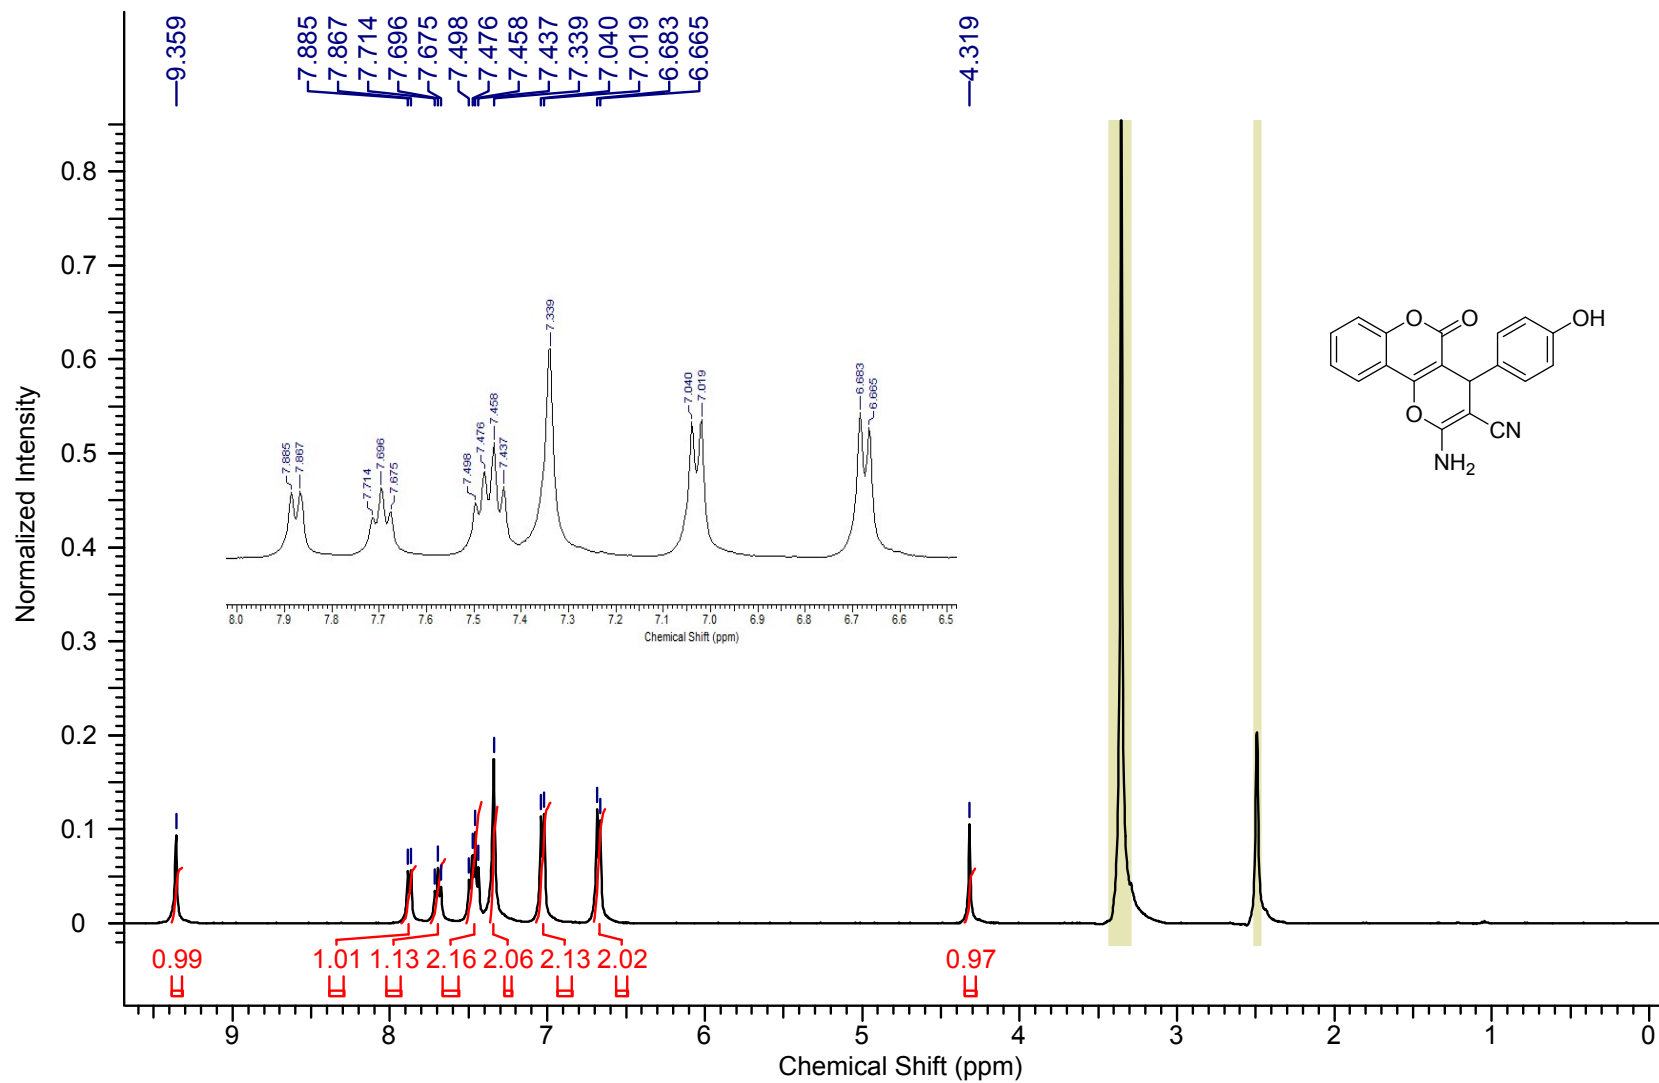

# <sup>13</sup>C NMR of 8d

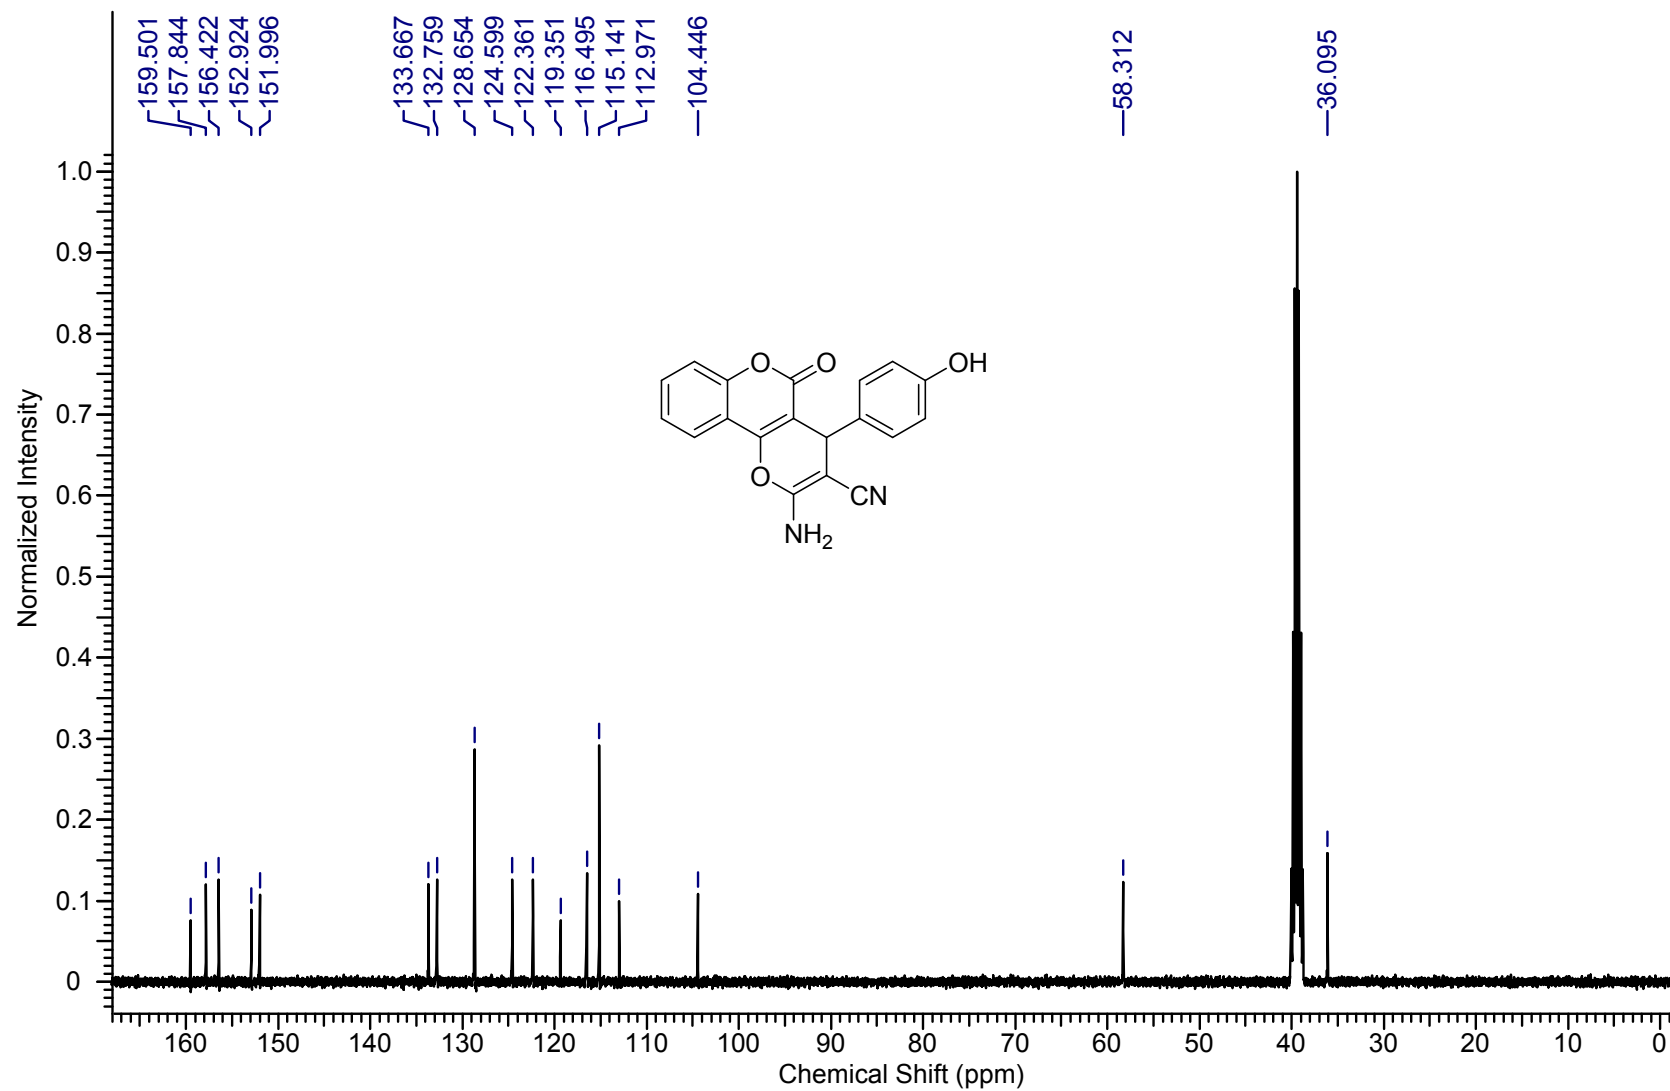

# $^1\text{H}$ NMR of 8e

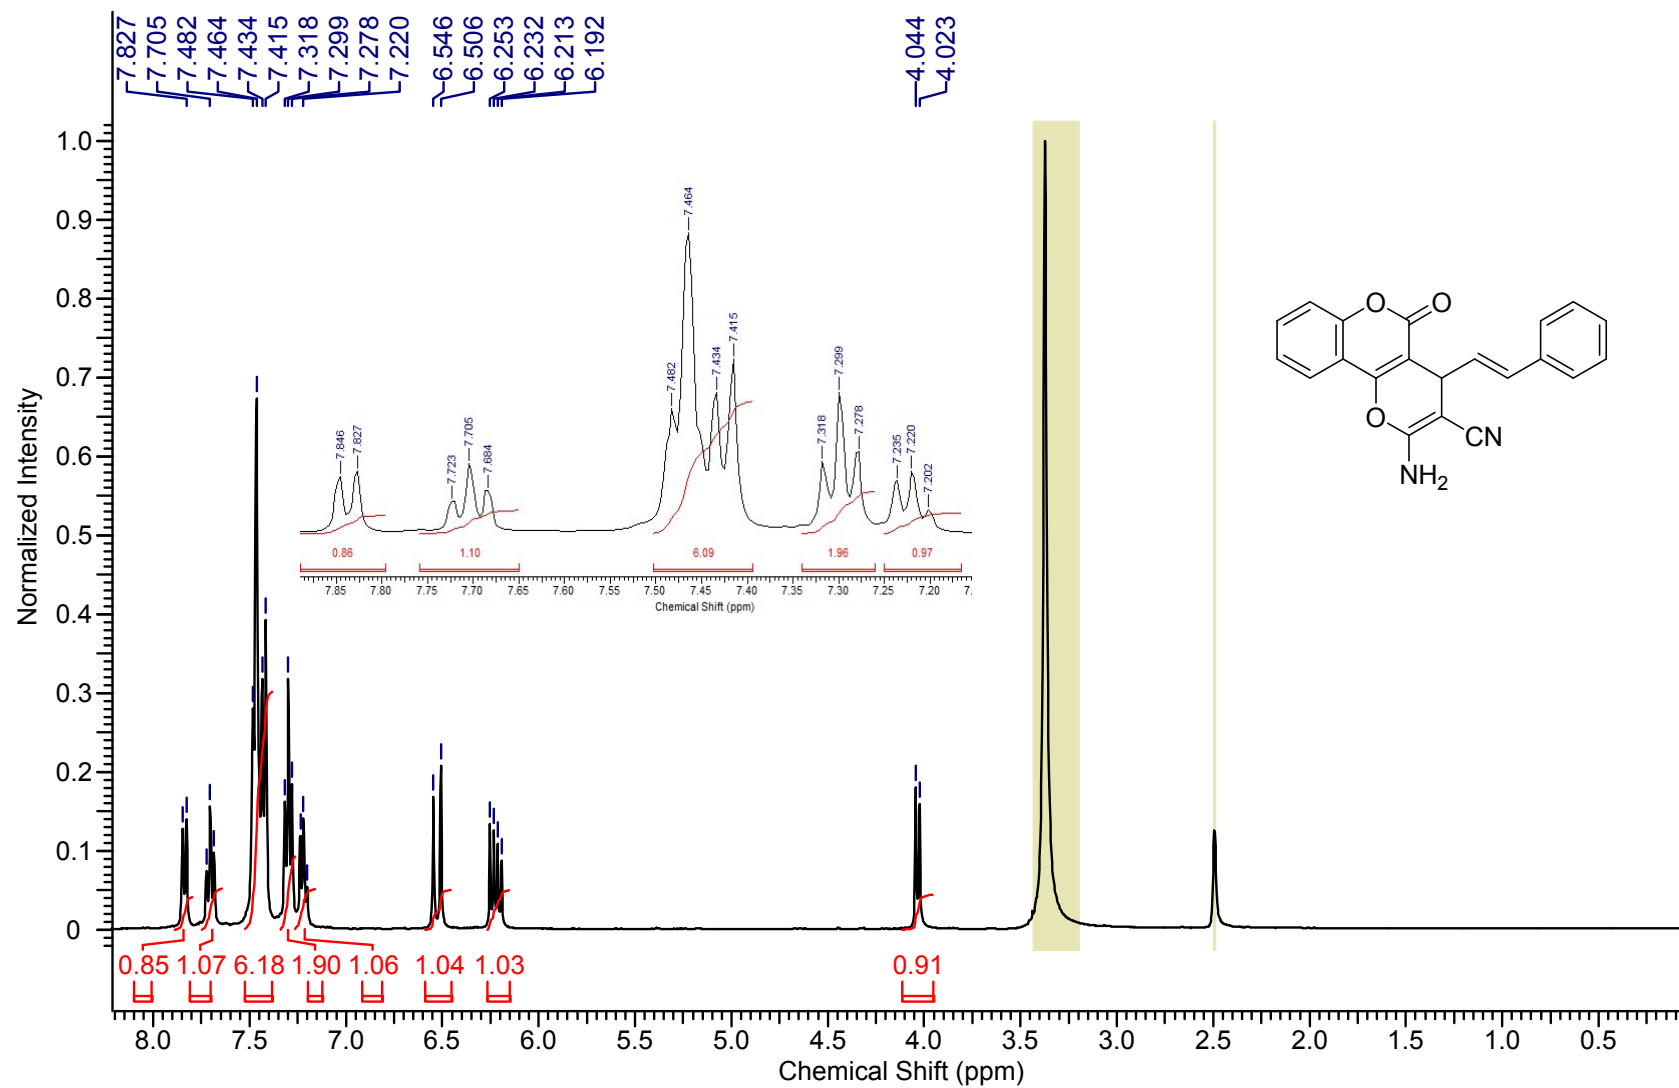

# <sup>13</sup>C NMR of 8e

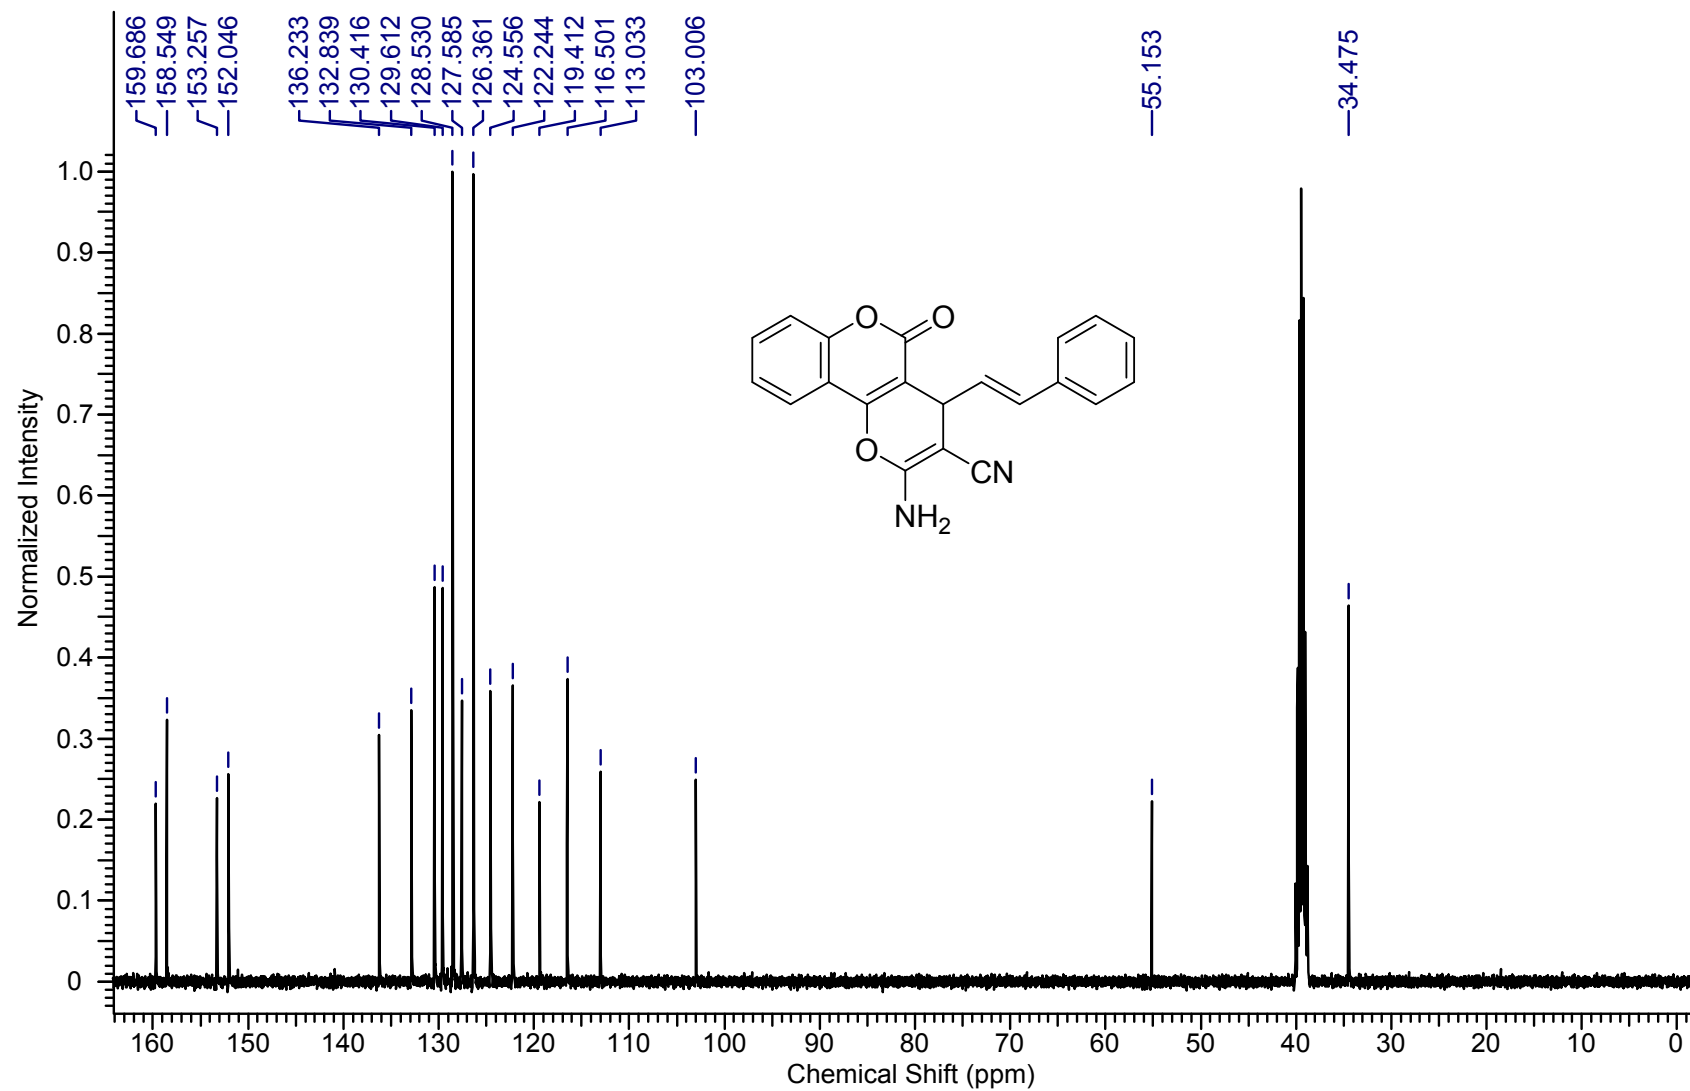

# $^1\text{H}$ NMR of 9b

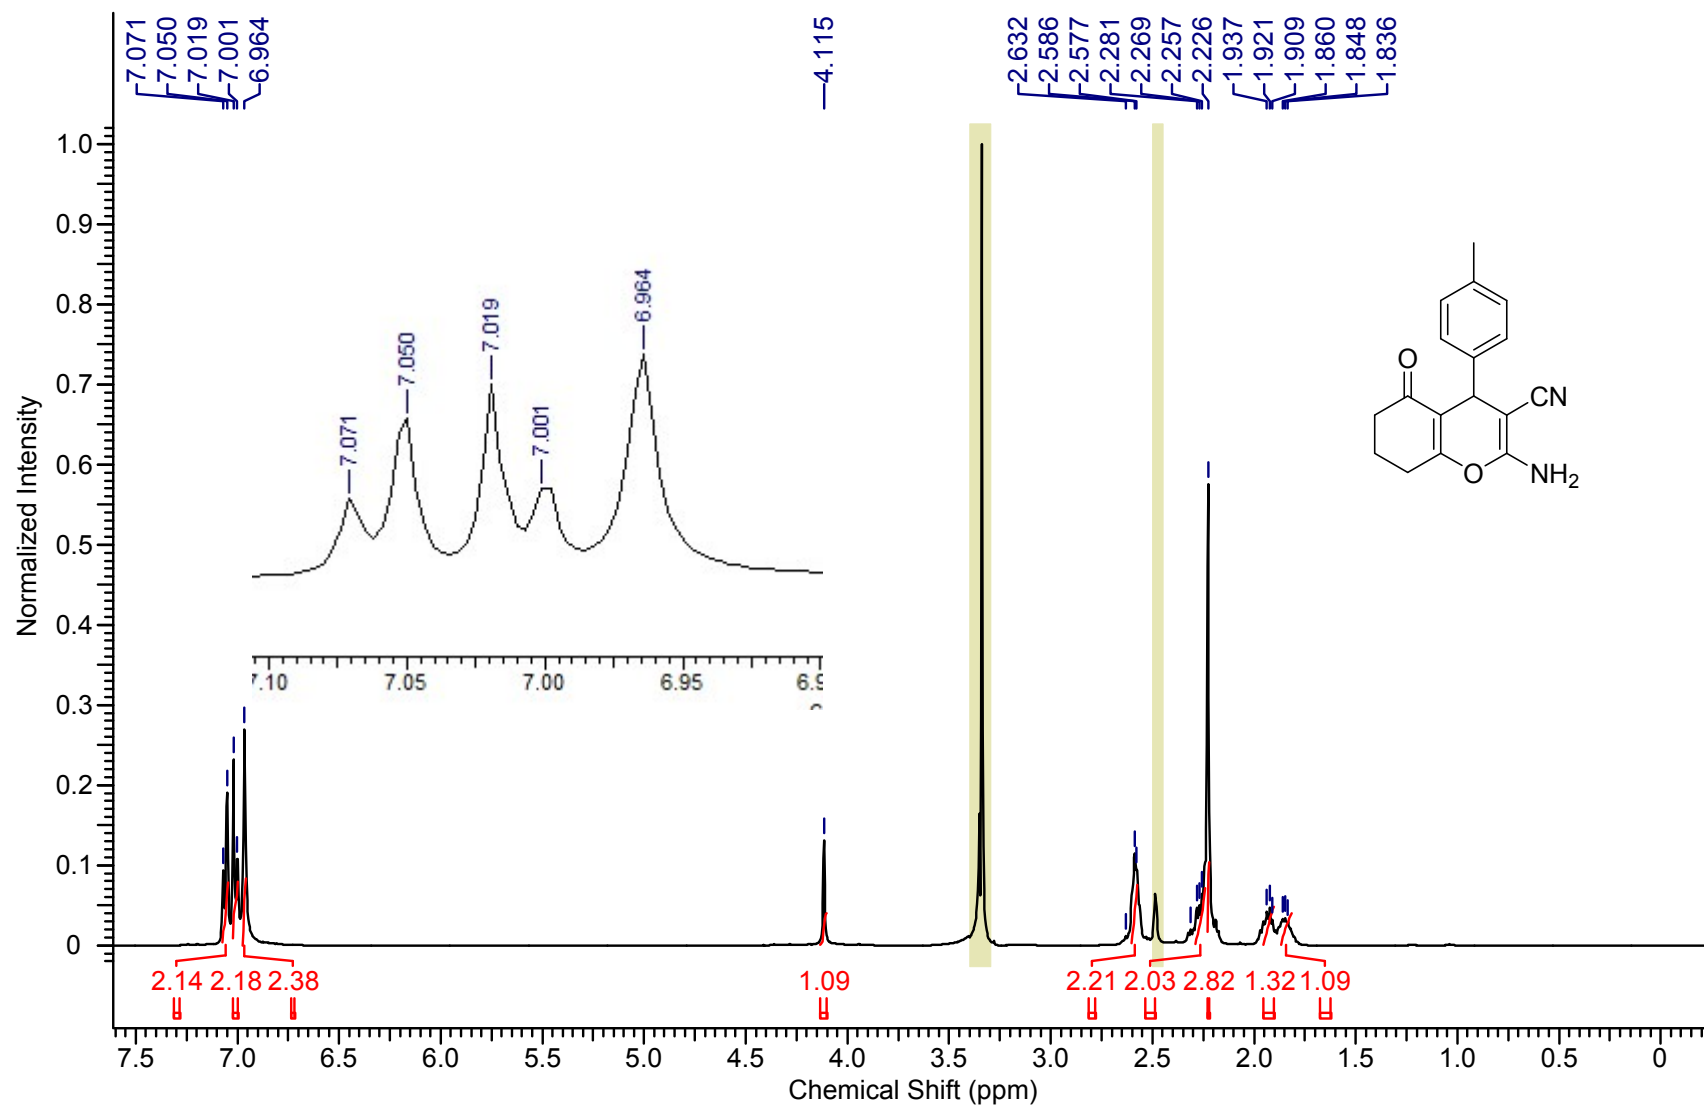

# <sup>13</sup>C NMR of 9b

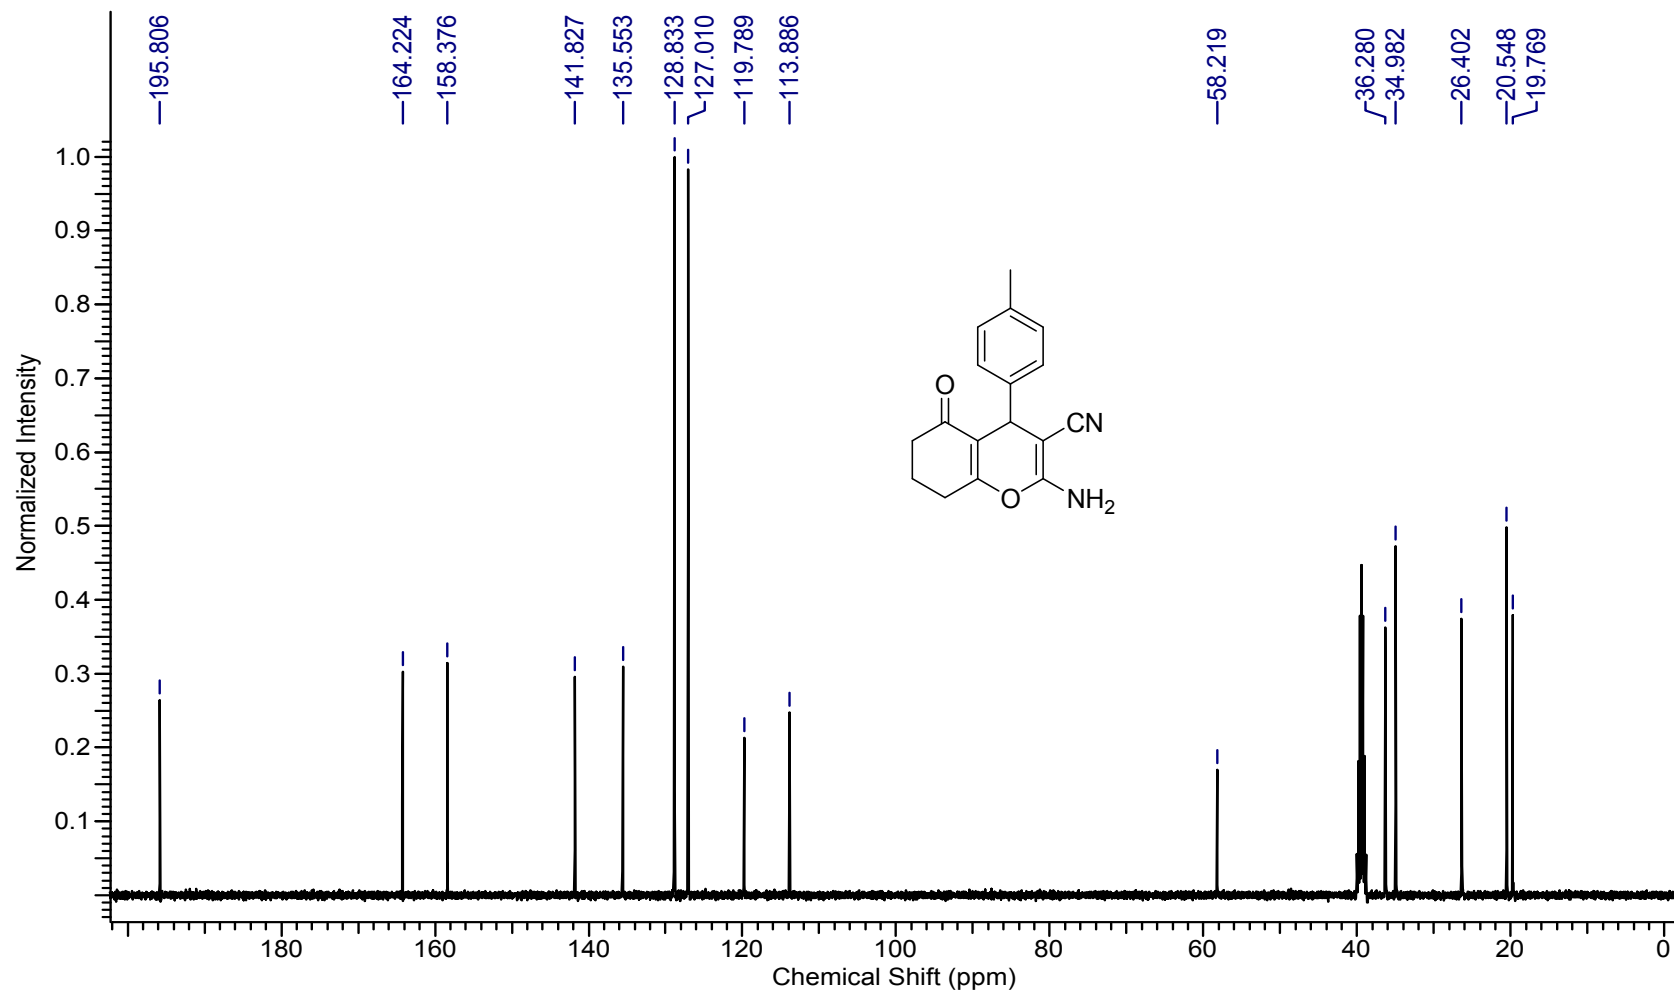



# $^1\text{H}$ NMR of 9c

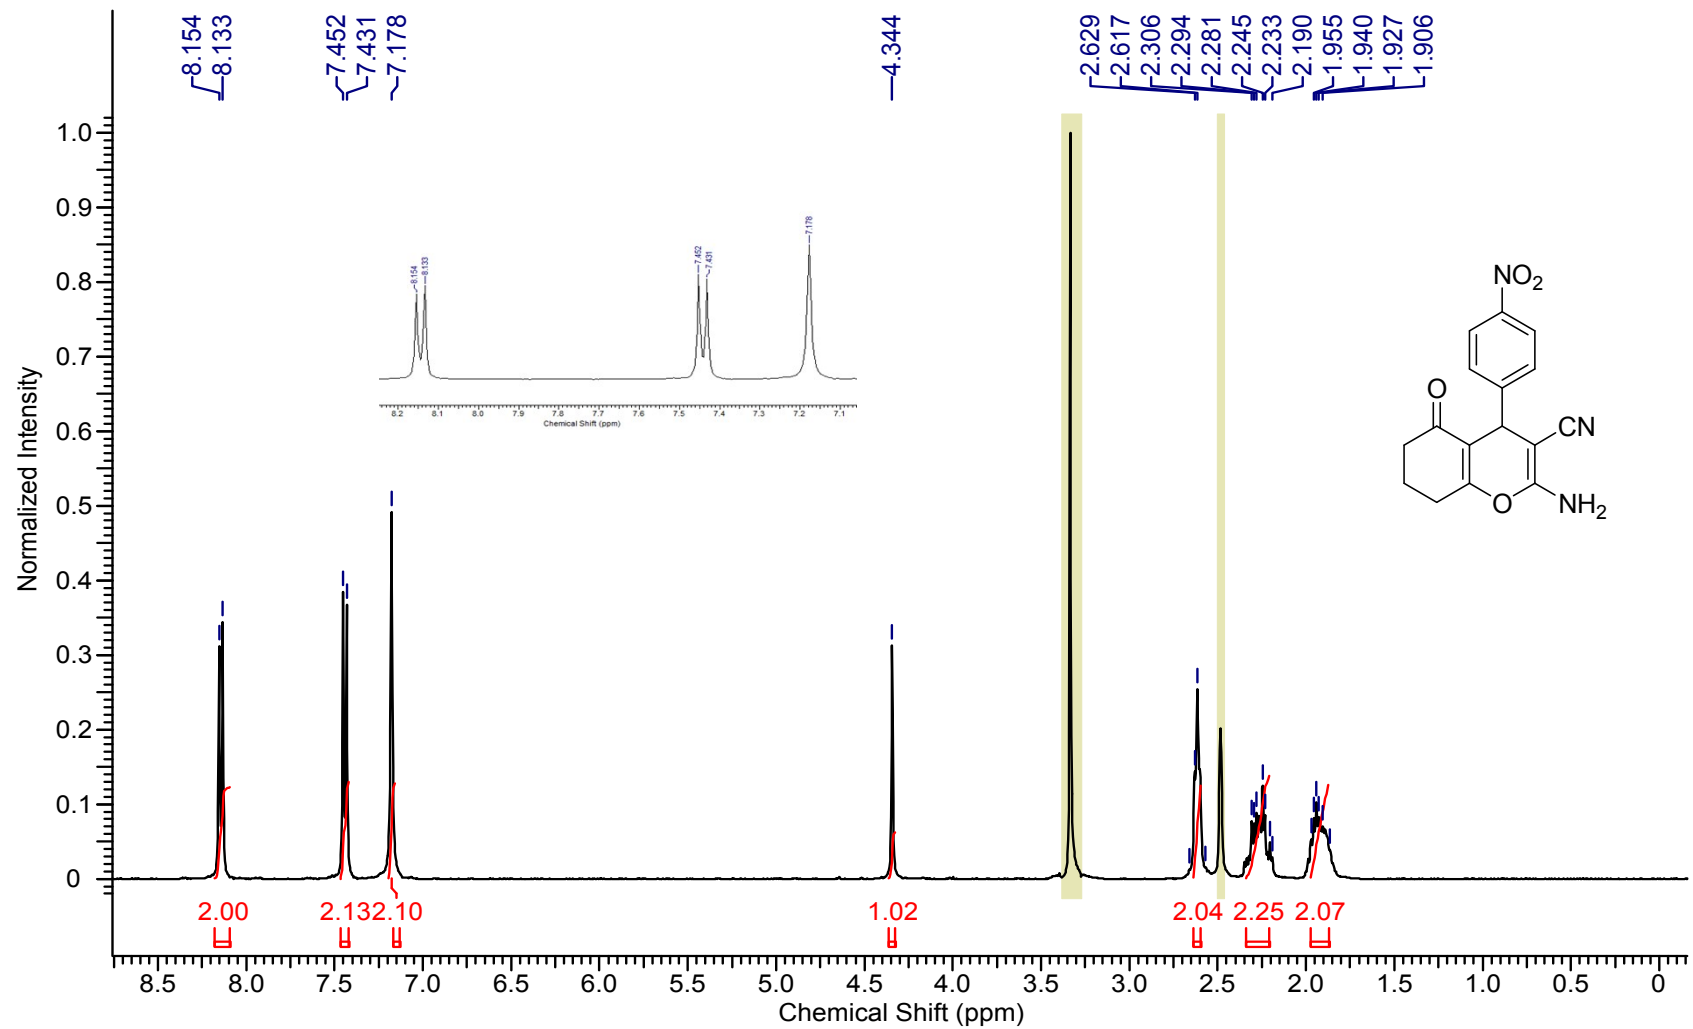

# <sup>13</sup>C NMR of 9c

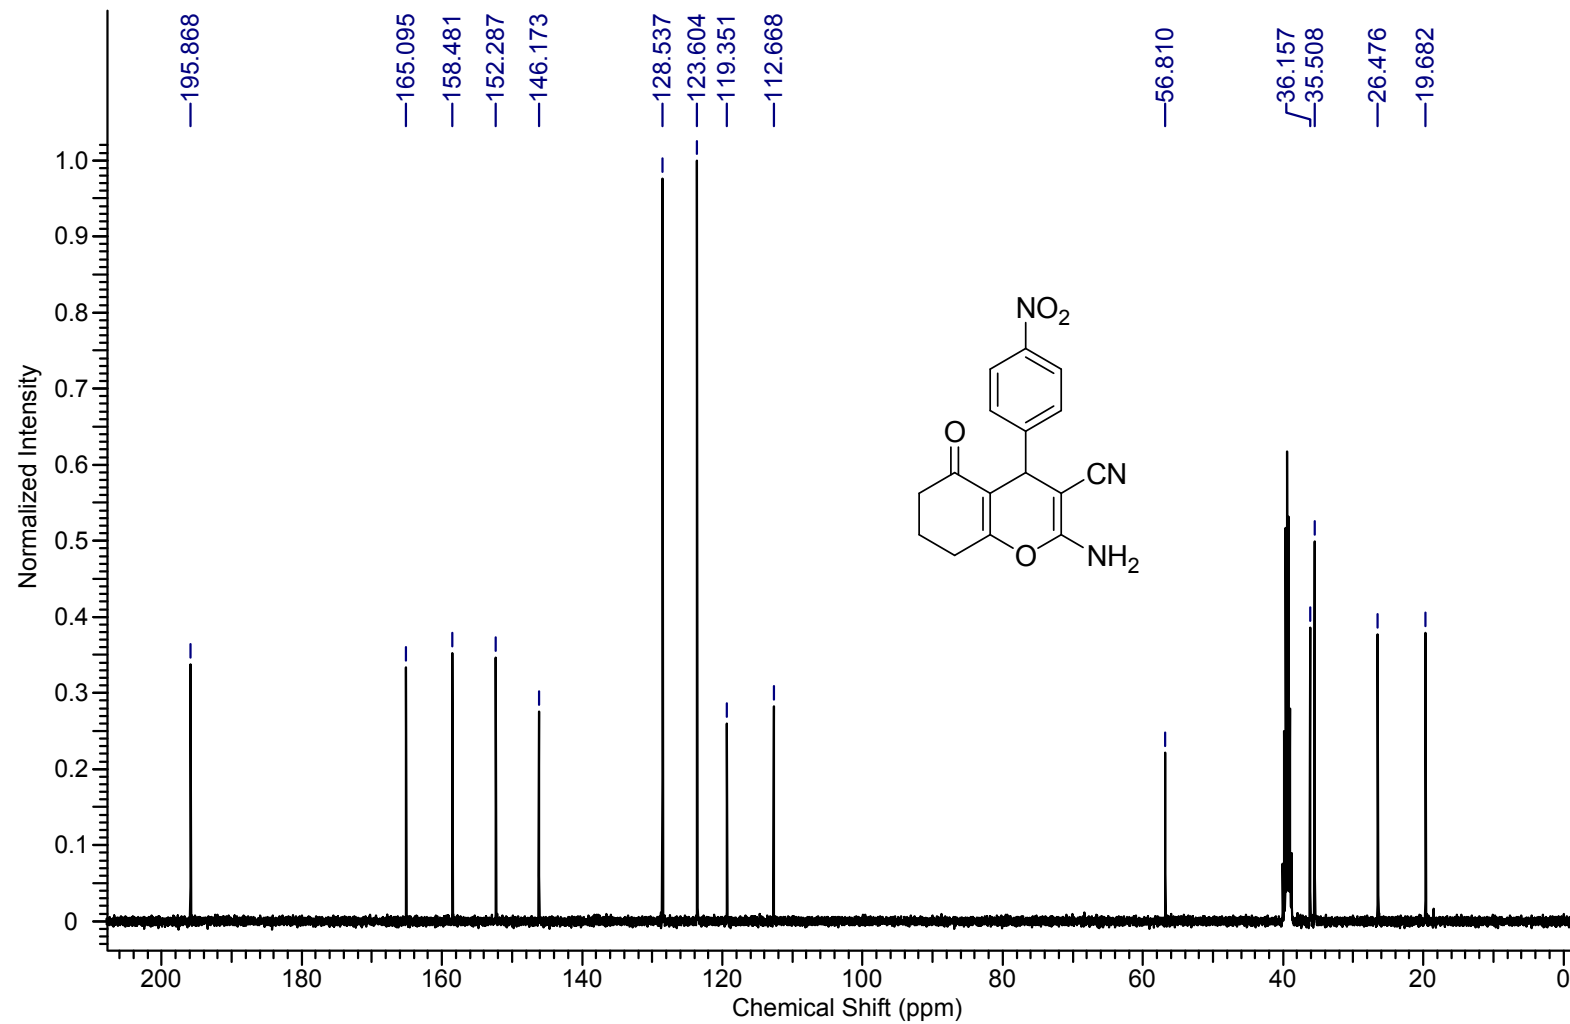

# $^1\text{H}$ NMR of 9d

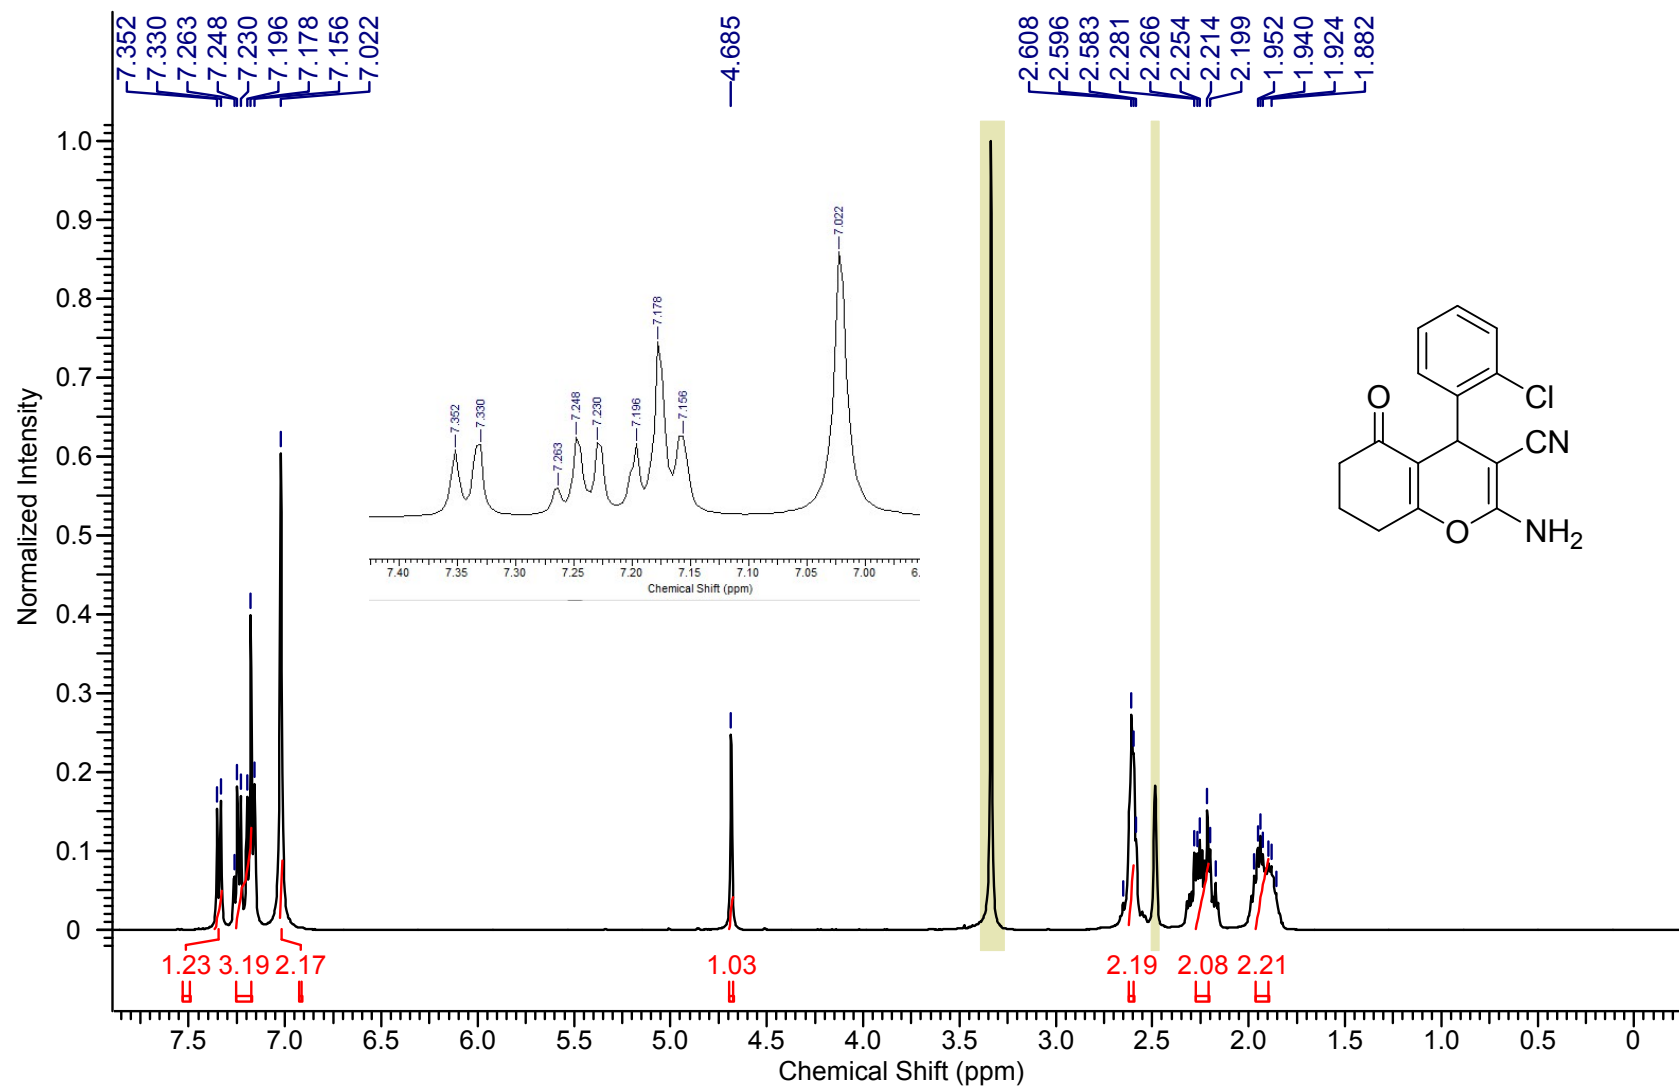

# <sup>13</sup>C NMR of 9d

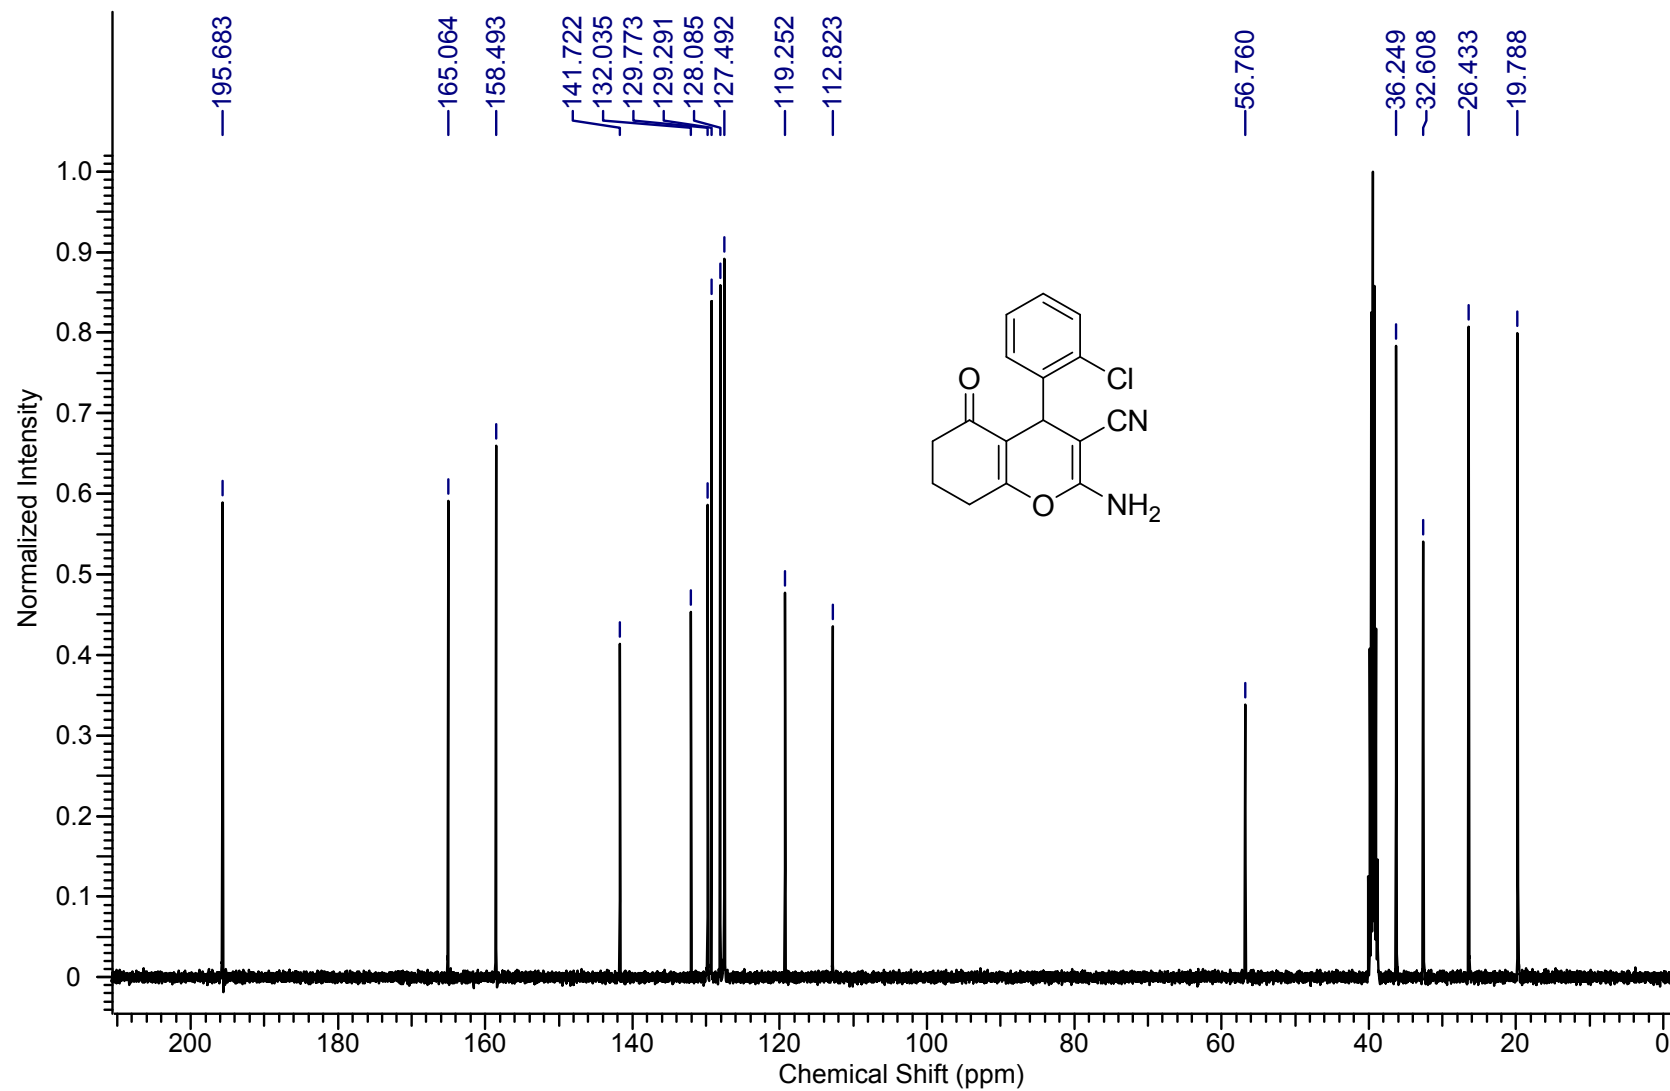

# $^1\text{H}$ NMR of 9e

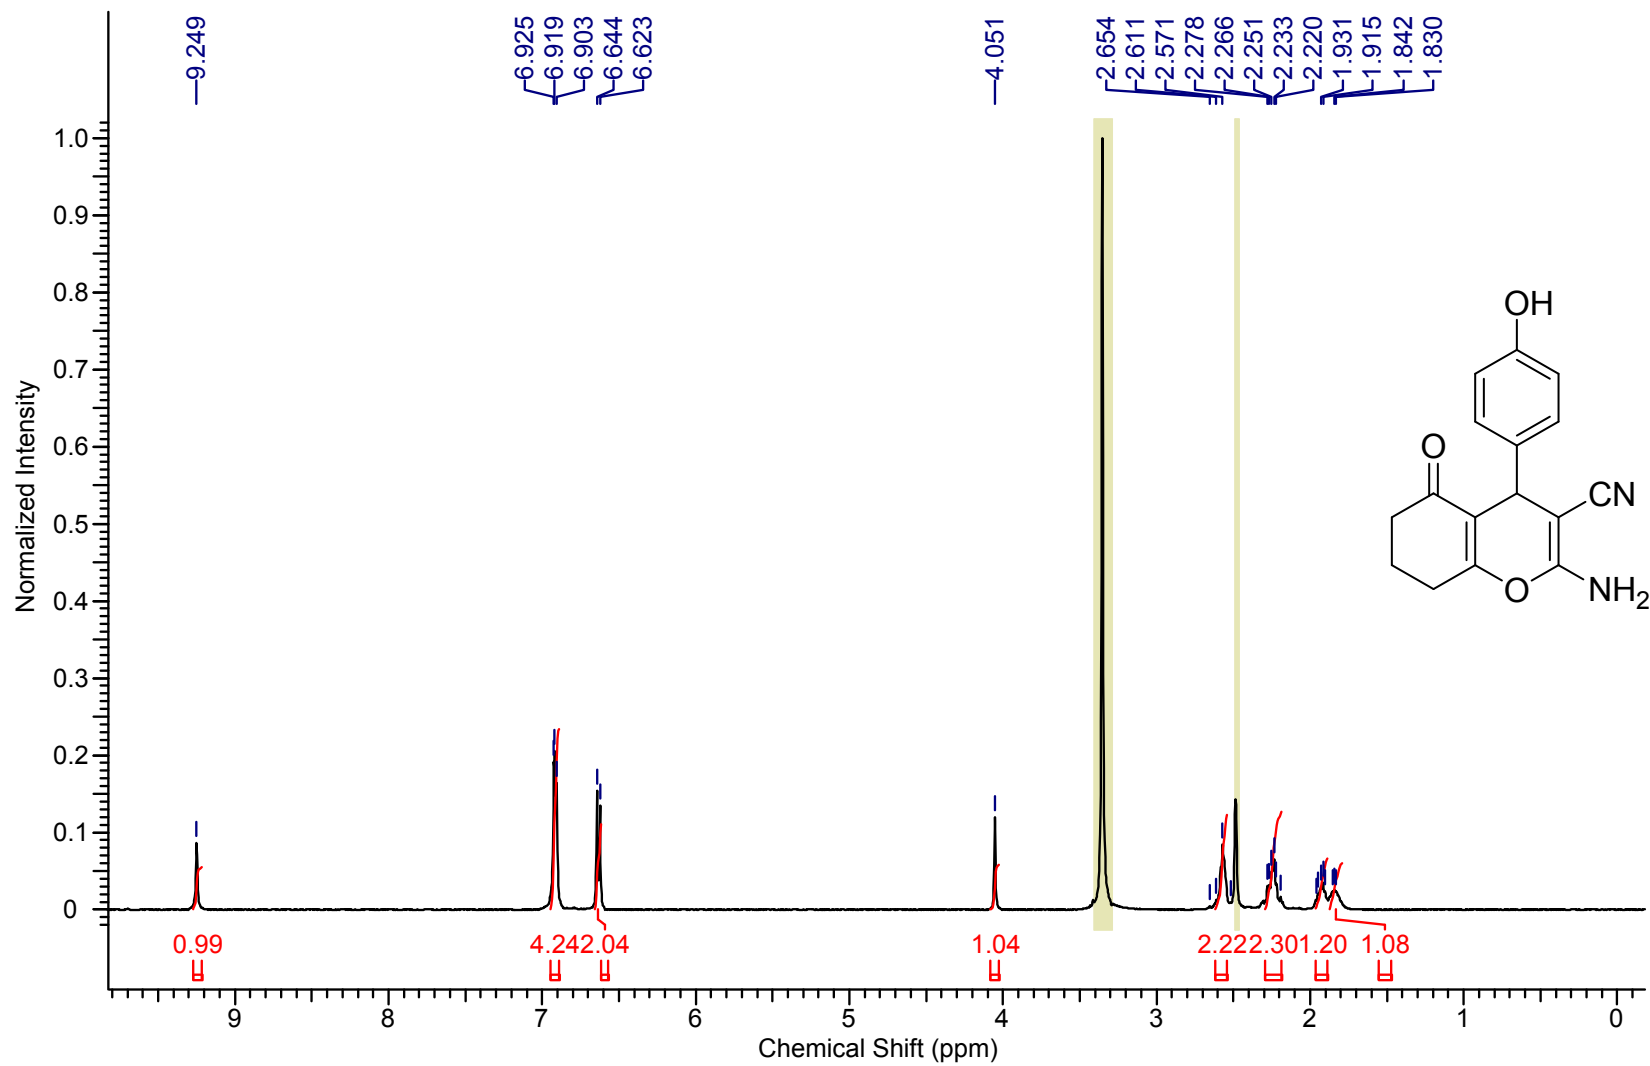

# <sup>13</sup>C NMR of 9e

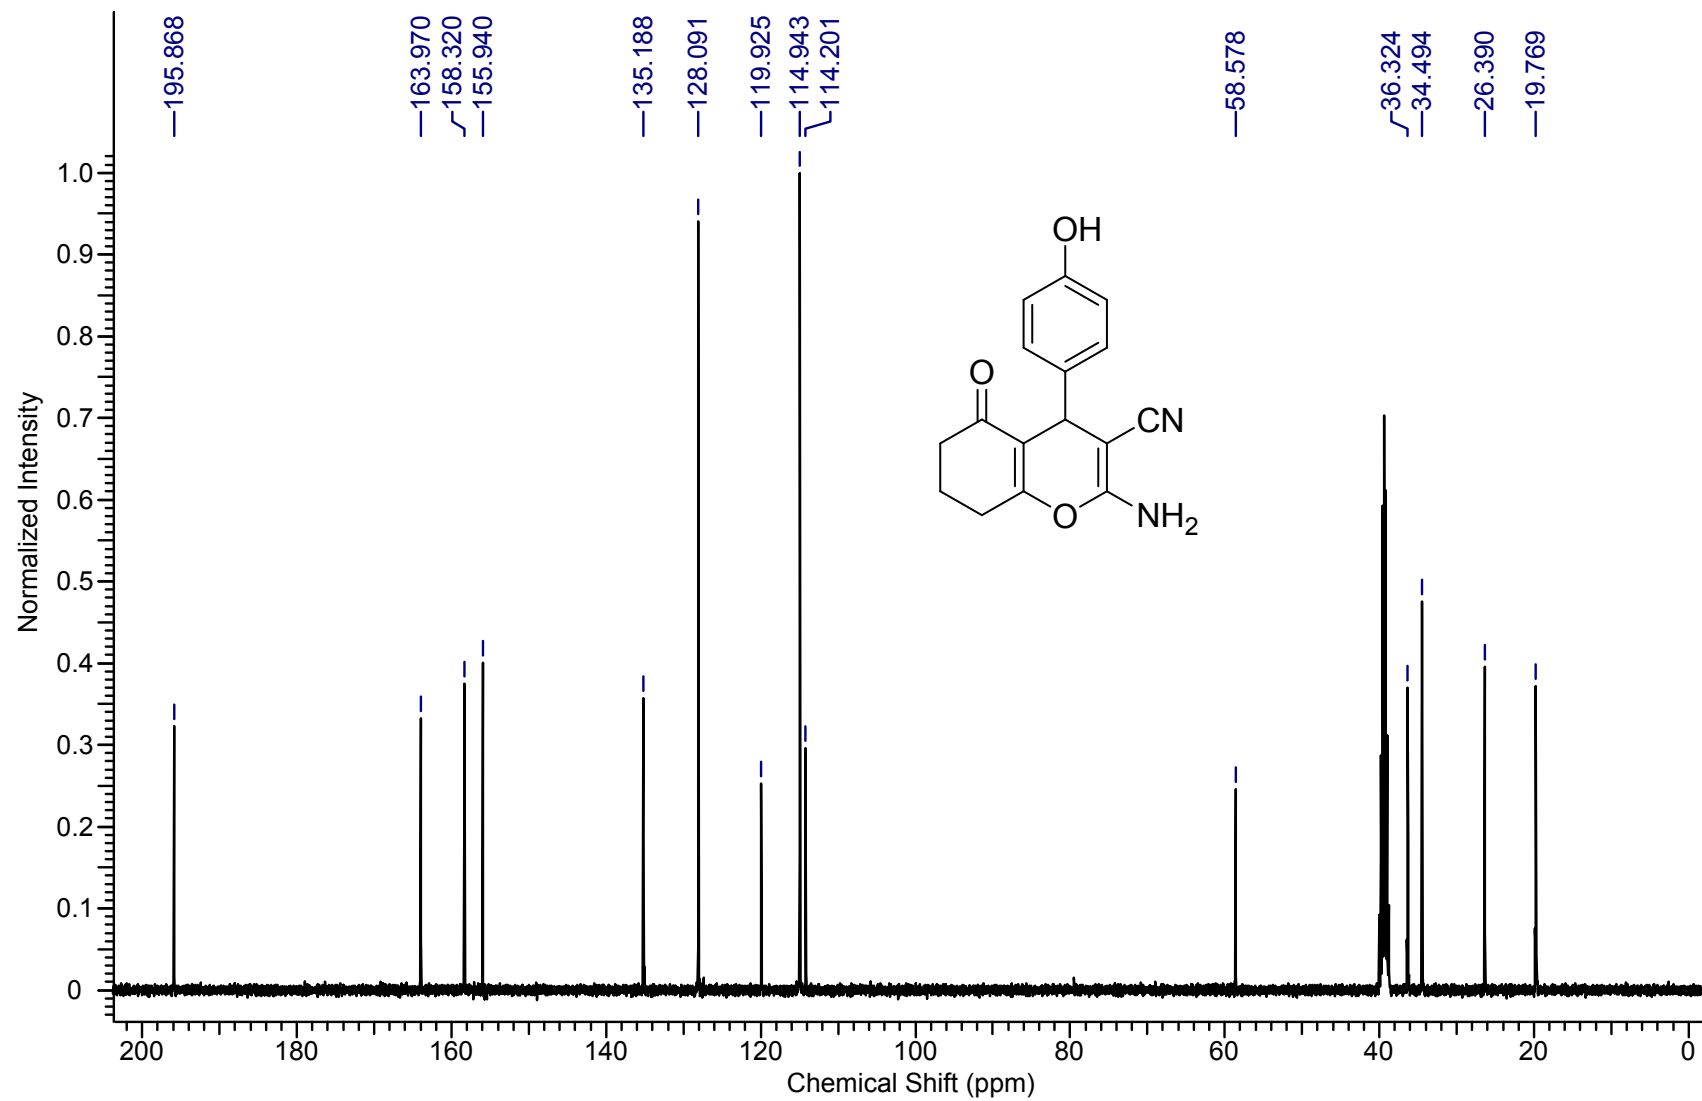

# $^1\text{H}$ NMR of 10a

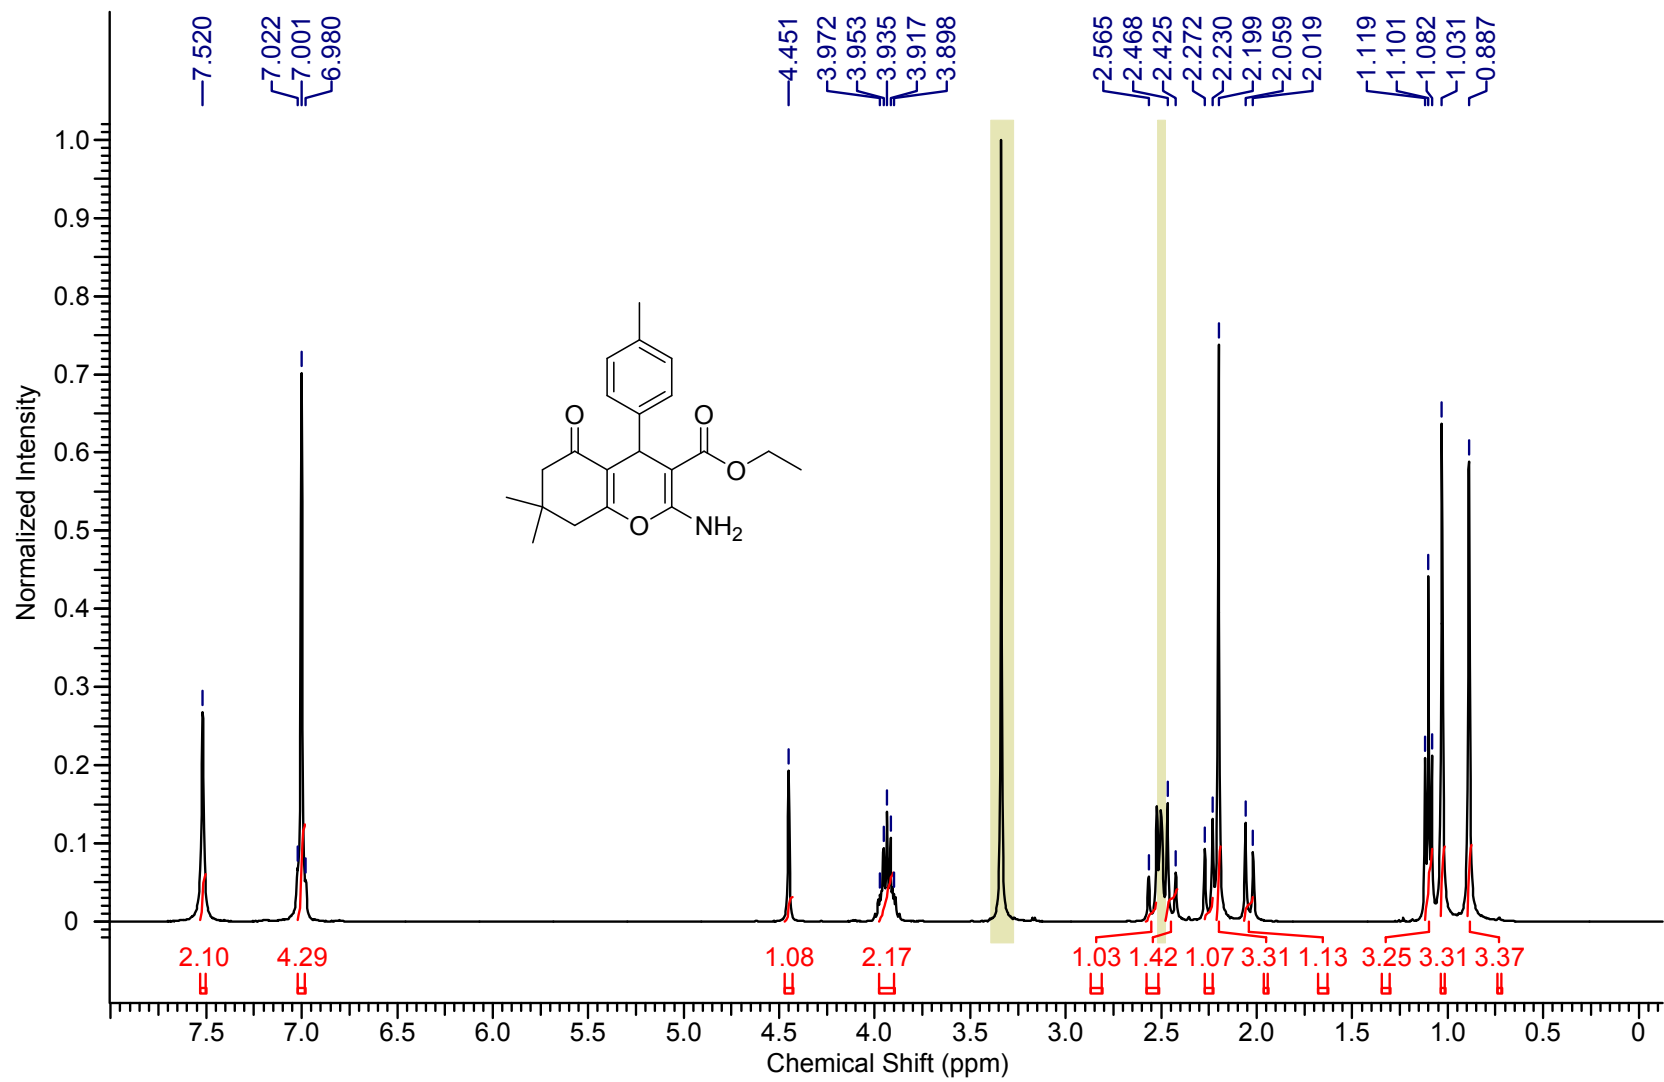

# <sup>13</sup>C NMR of 10a

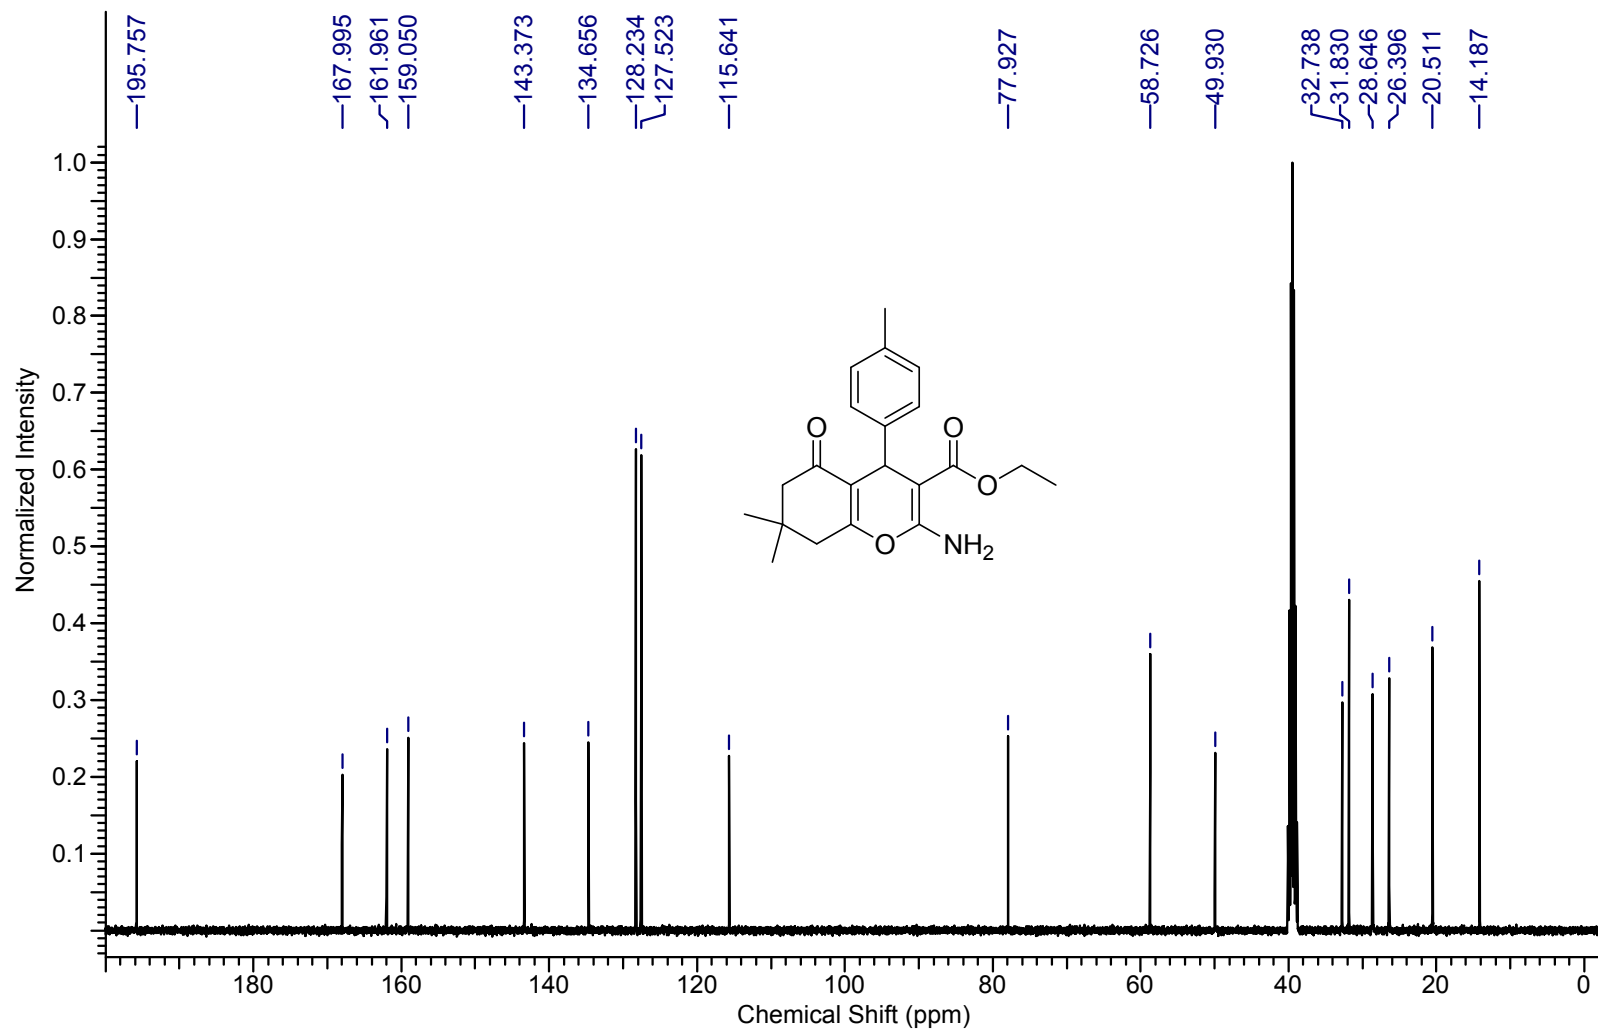



# <sup>1</sup>H NMR of 10b

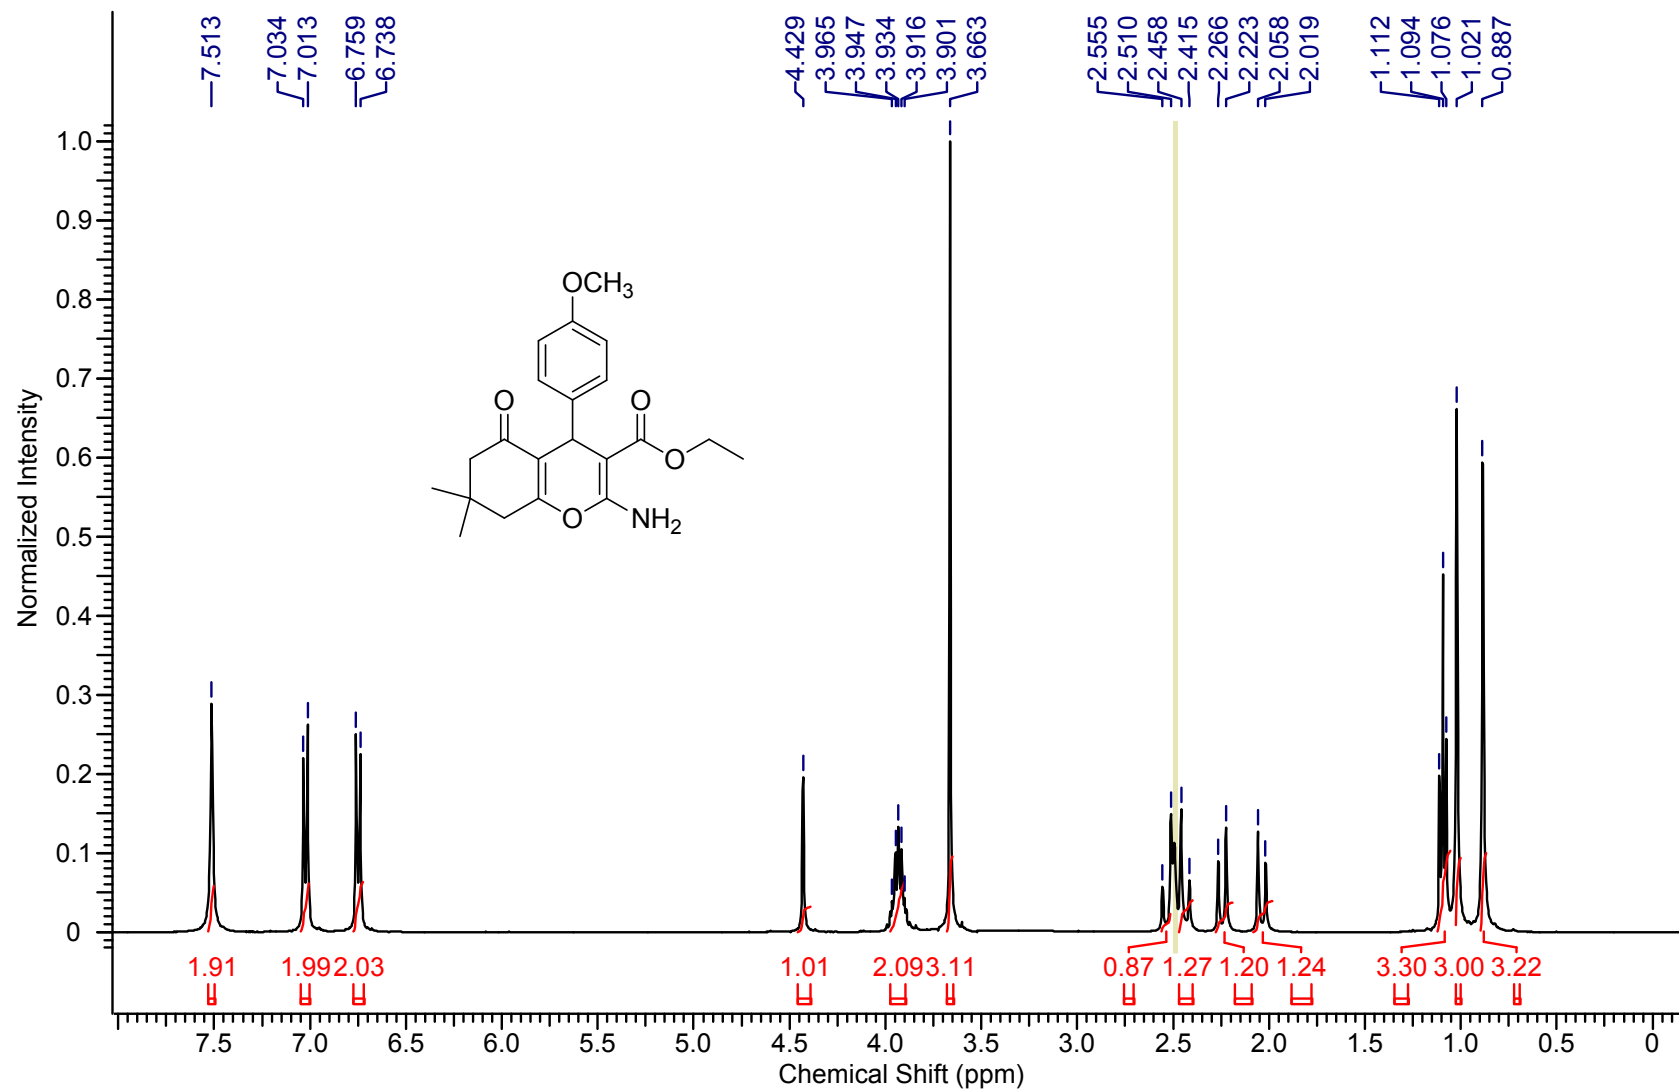

# $^{13}\text{C}$ NMR of 10b

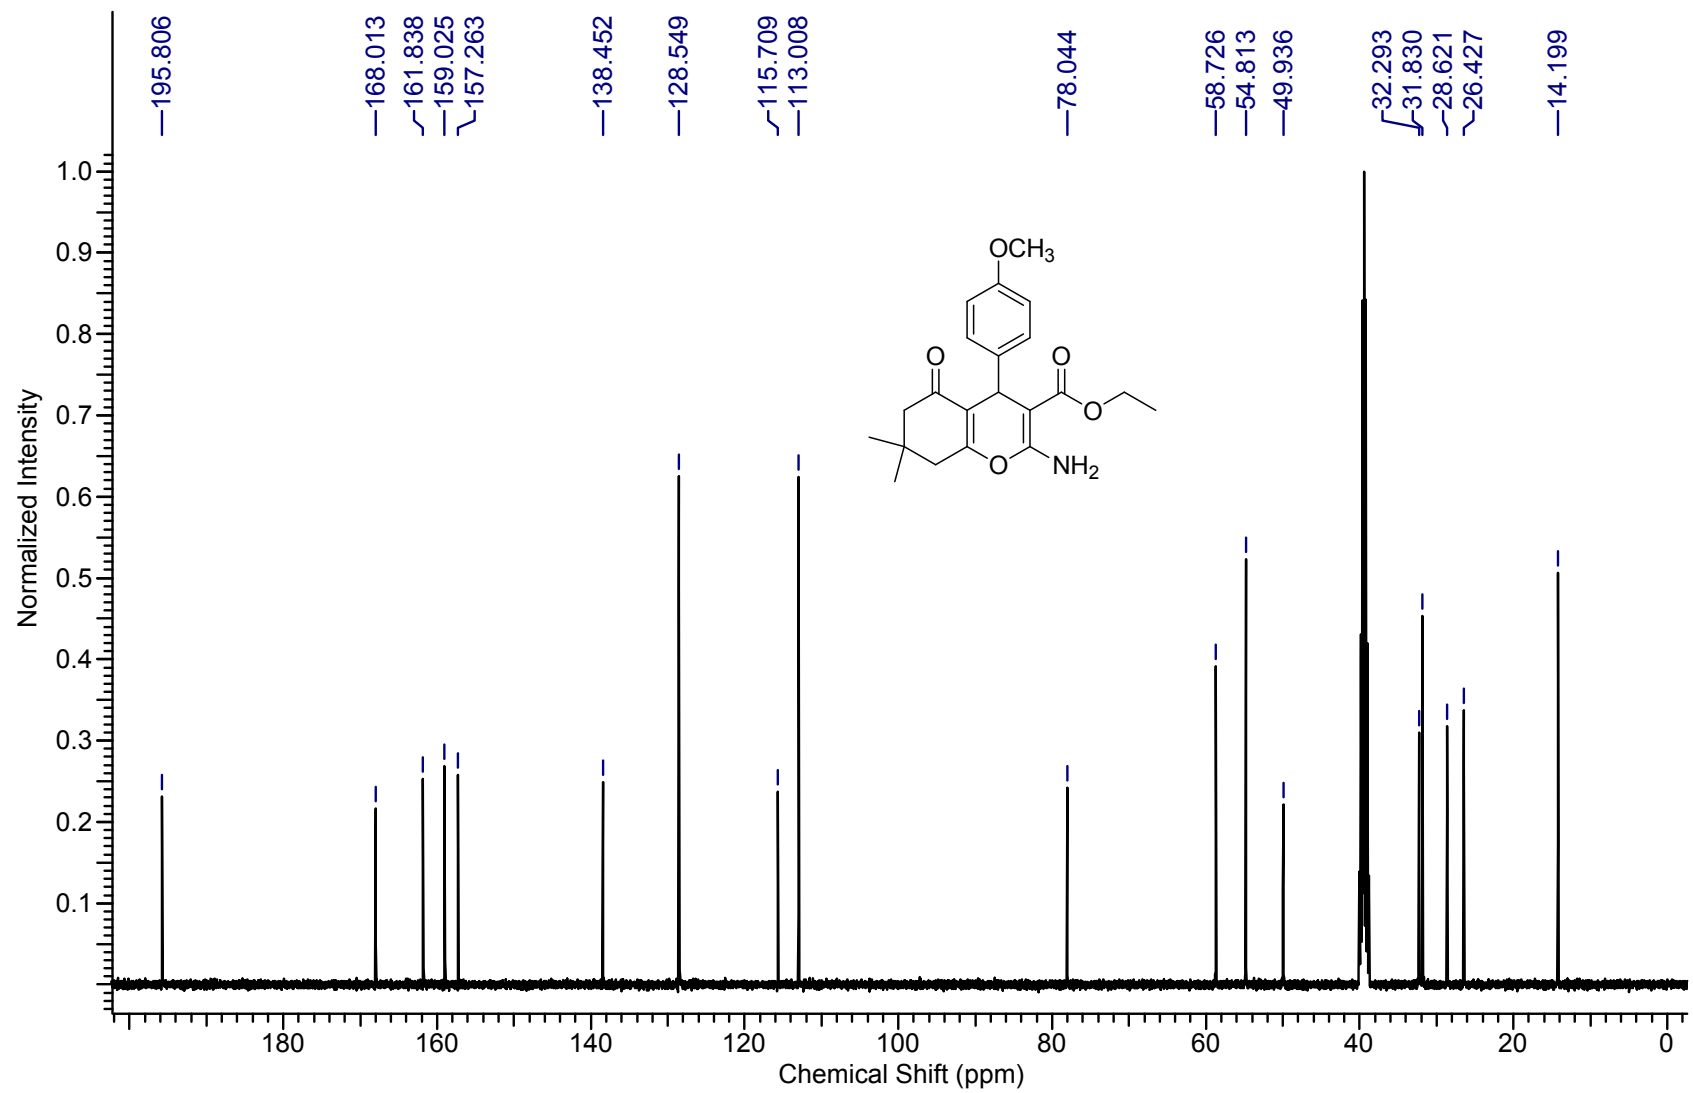

# $^1\text{H}$ NMR of 10c

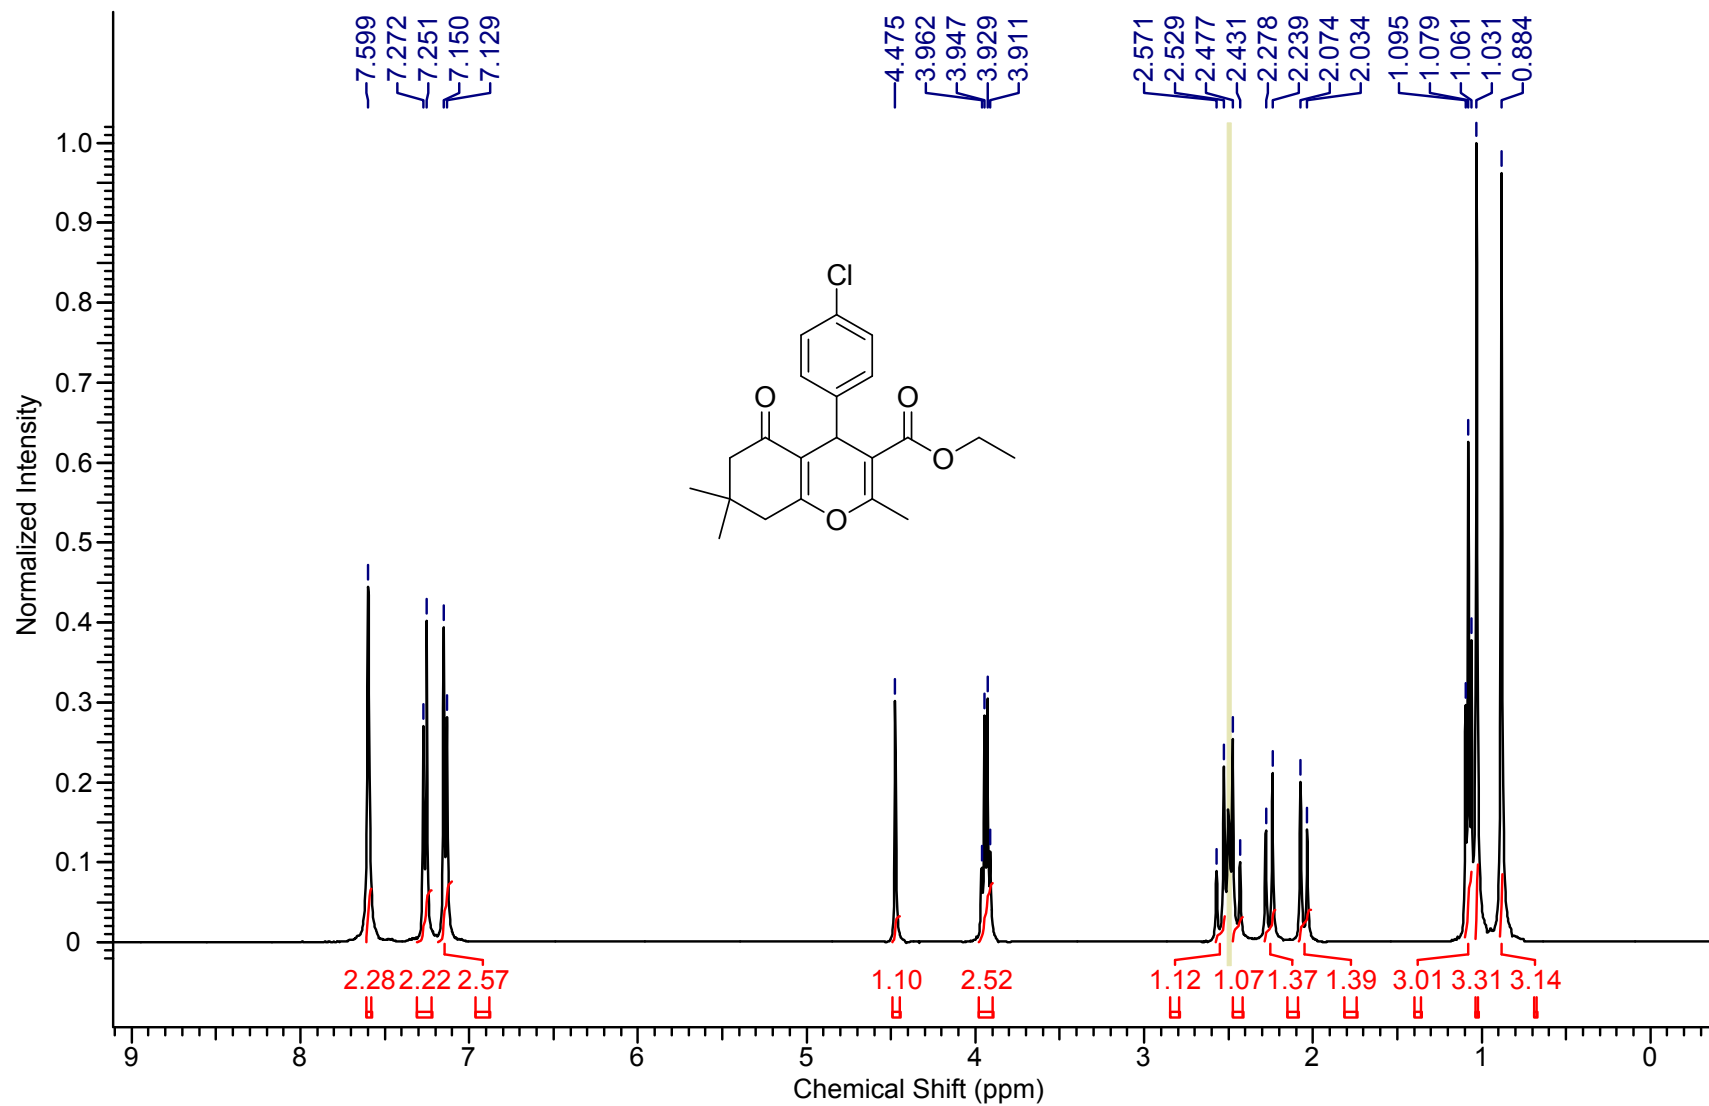

# <sup>13</sup>C NMR of 10c

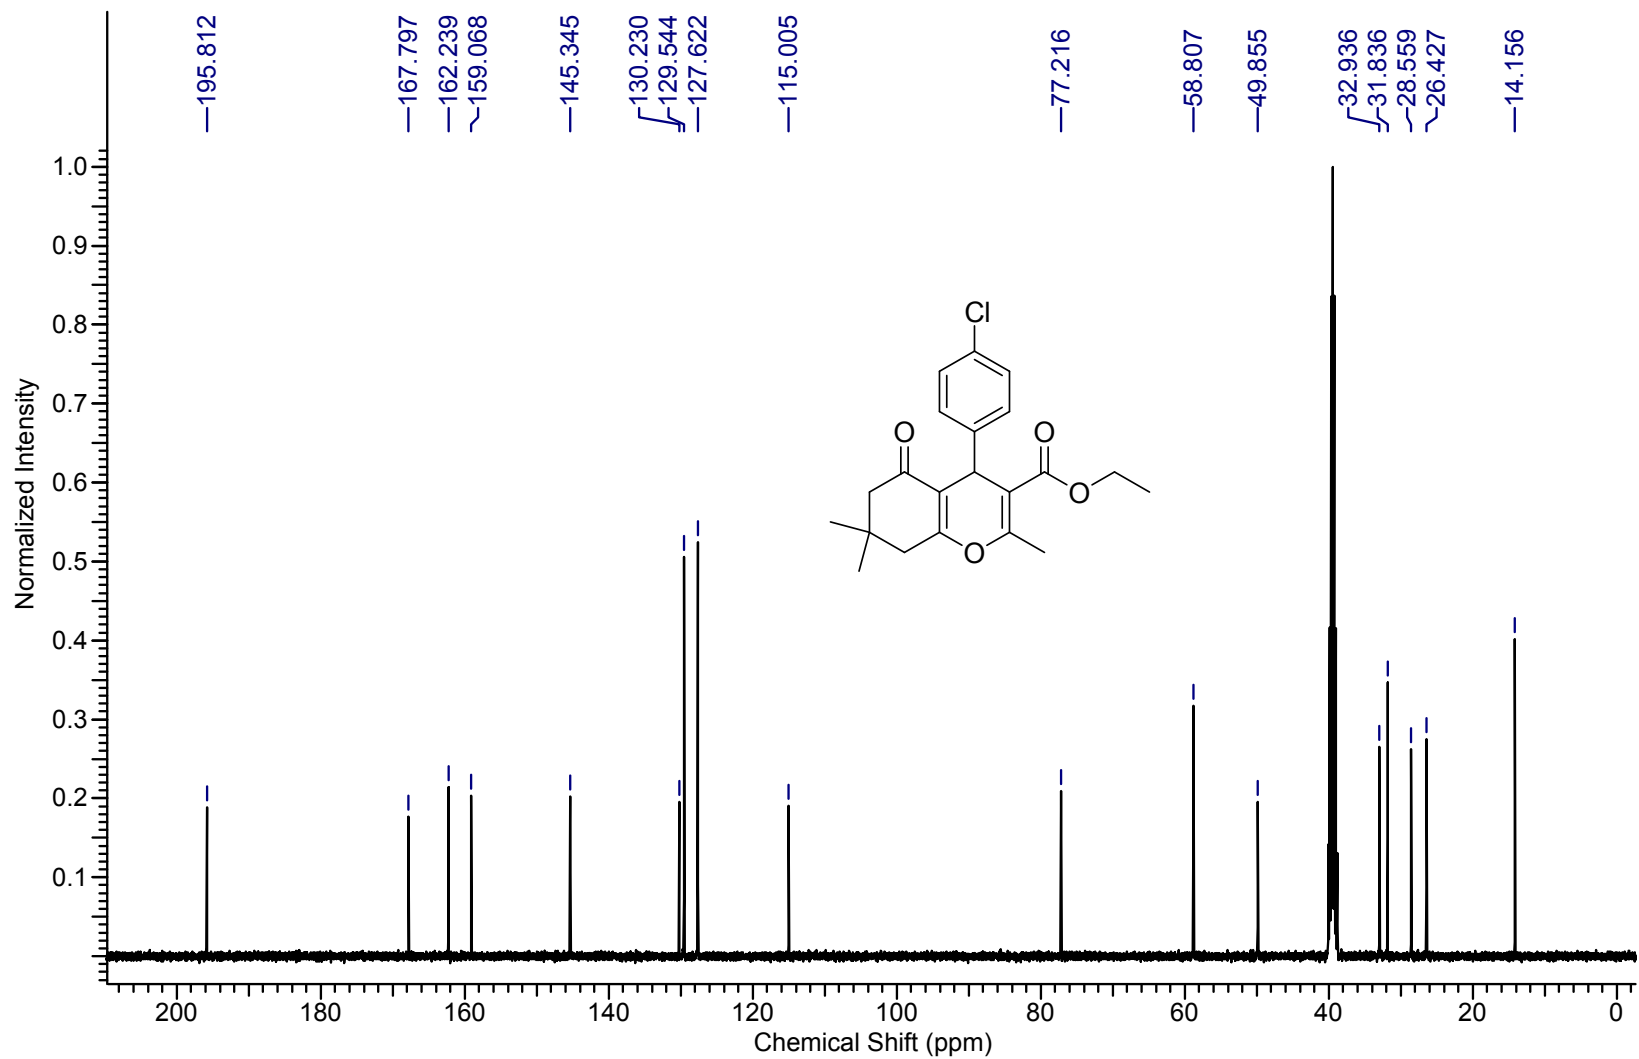

# $^1\text{H}$ NMR of 10d

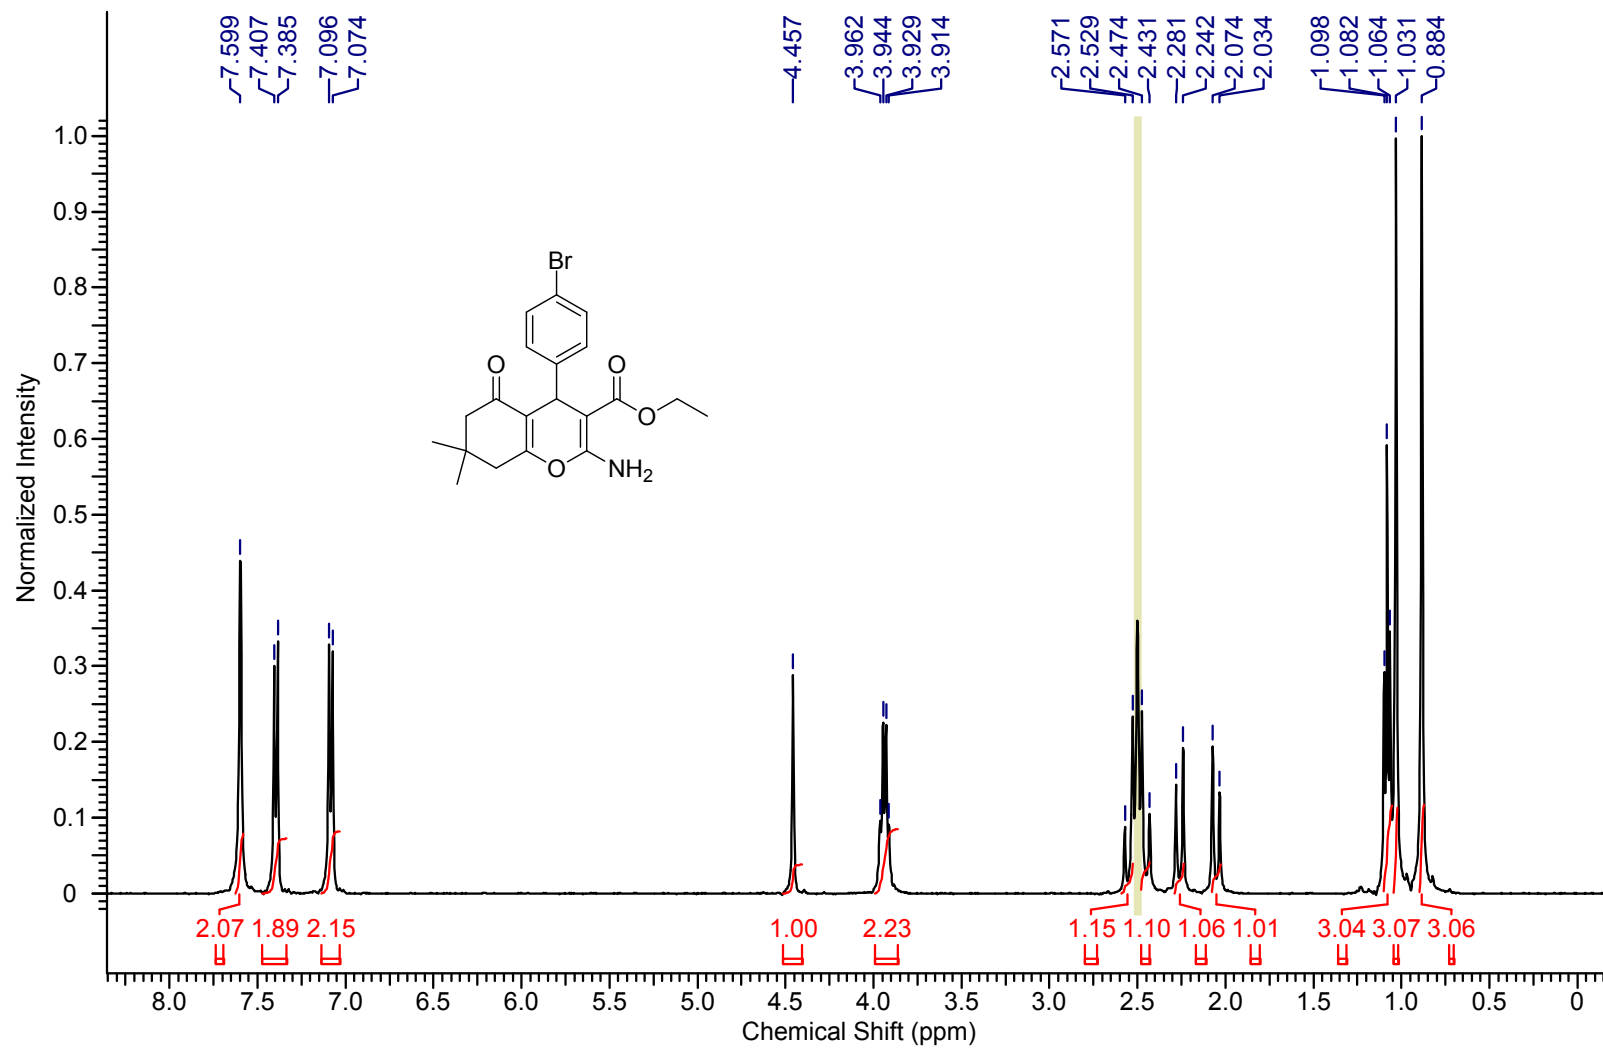

# <sup>13</sup>C NMR of 10d

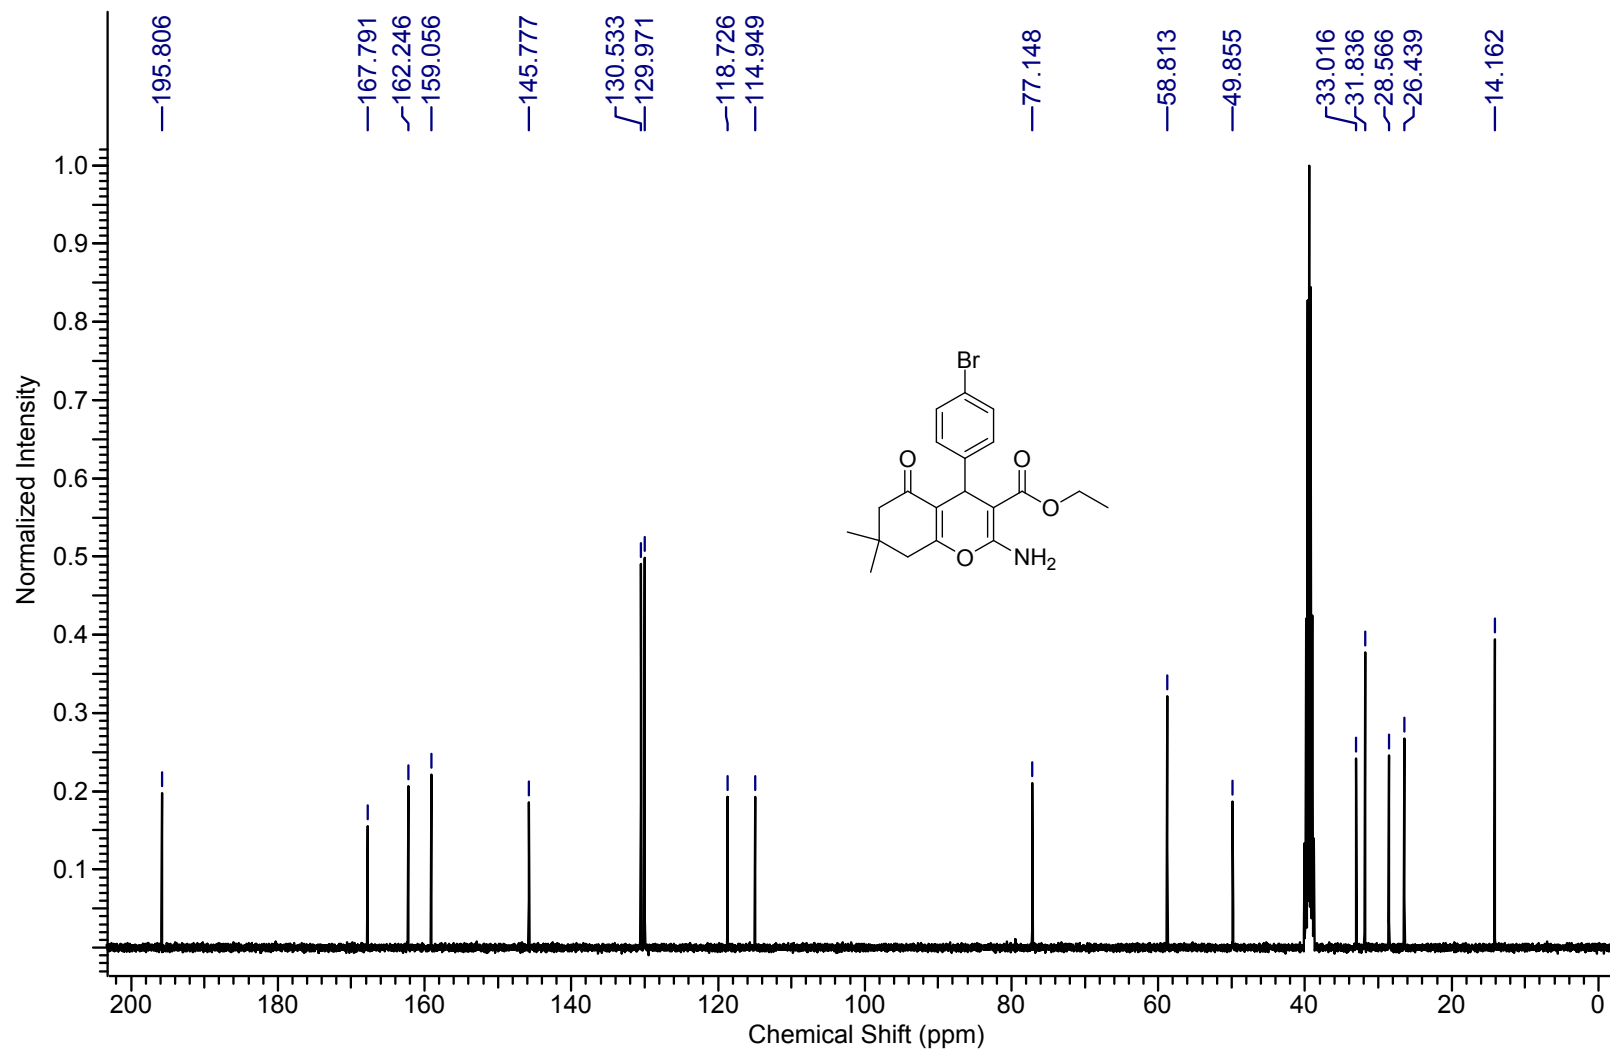

# $^1\text{H}$ NMR of 10e

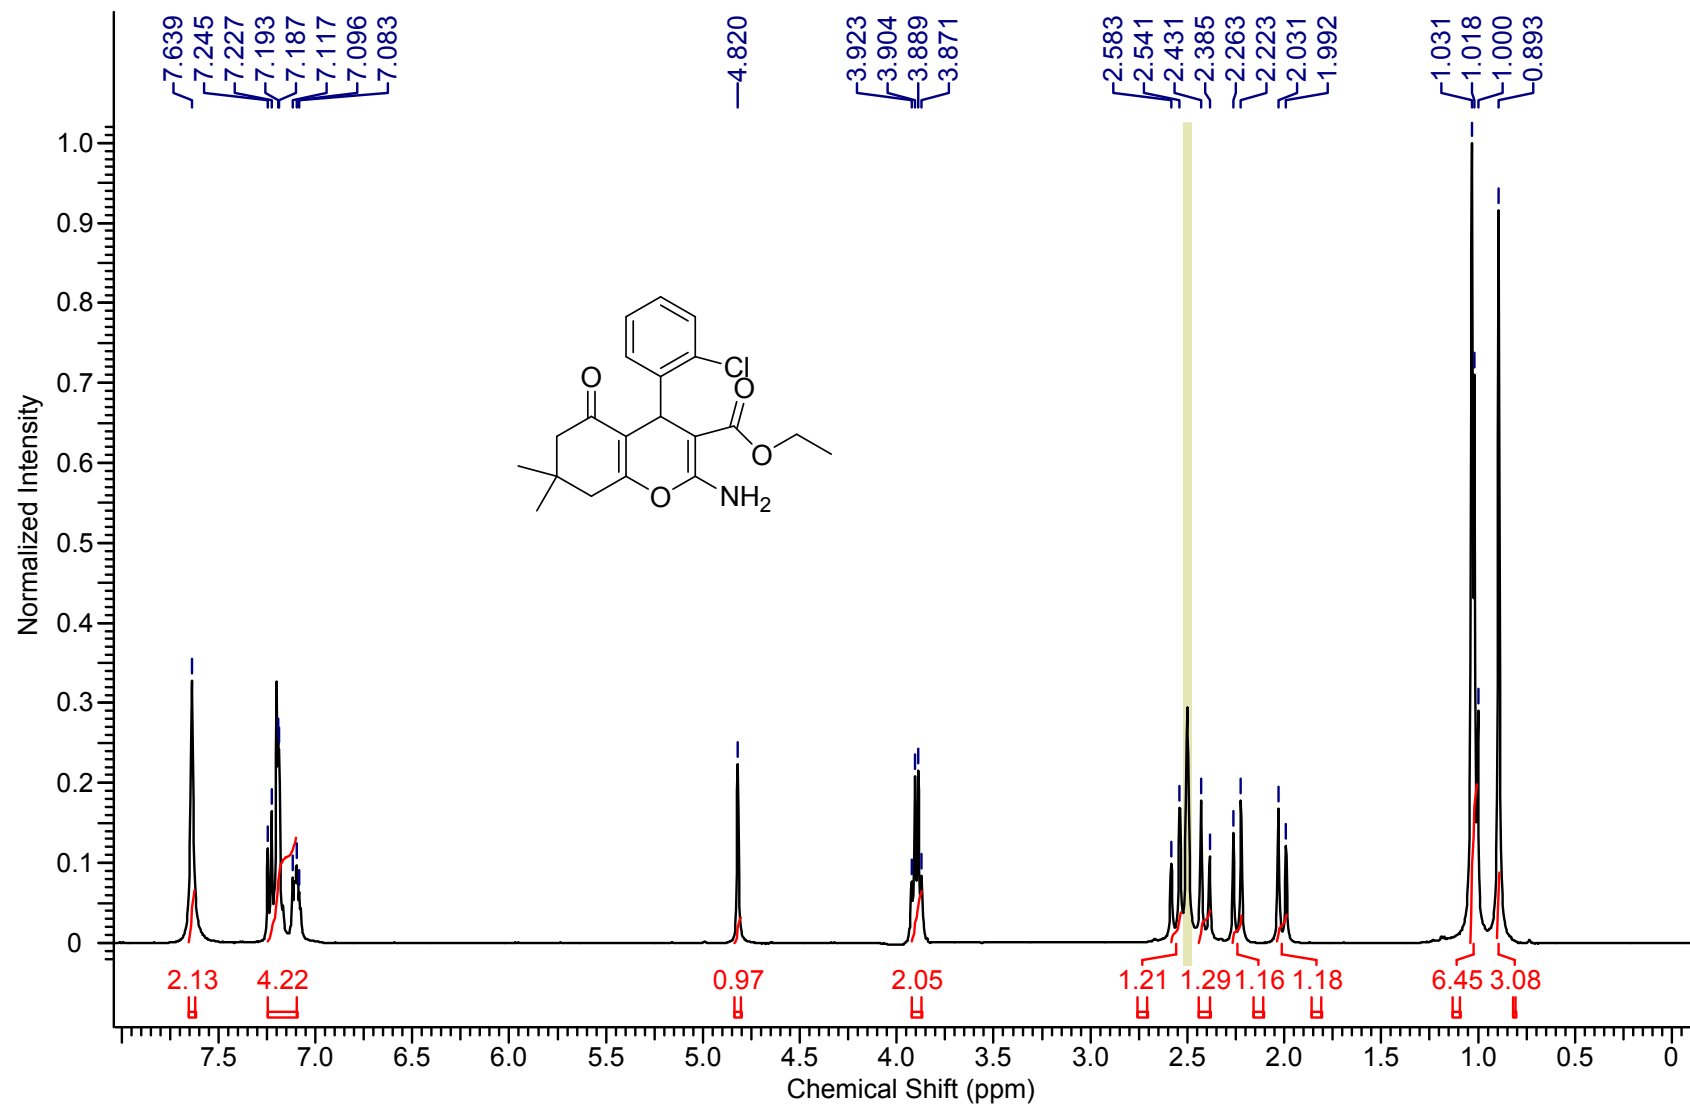

# <sup>13</sup>C NMR of 10e

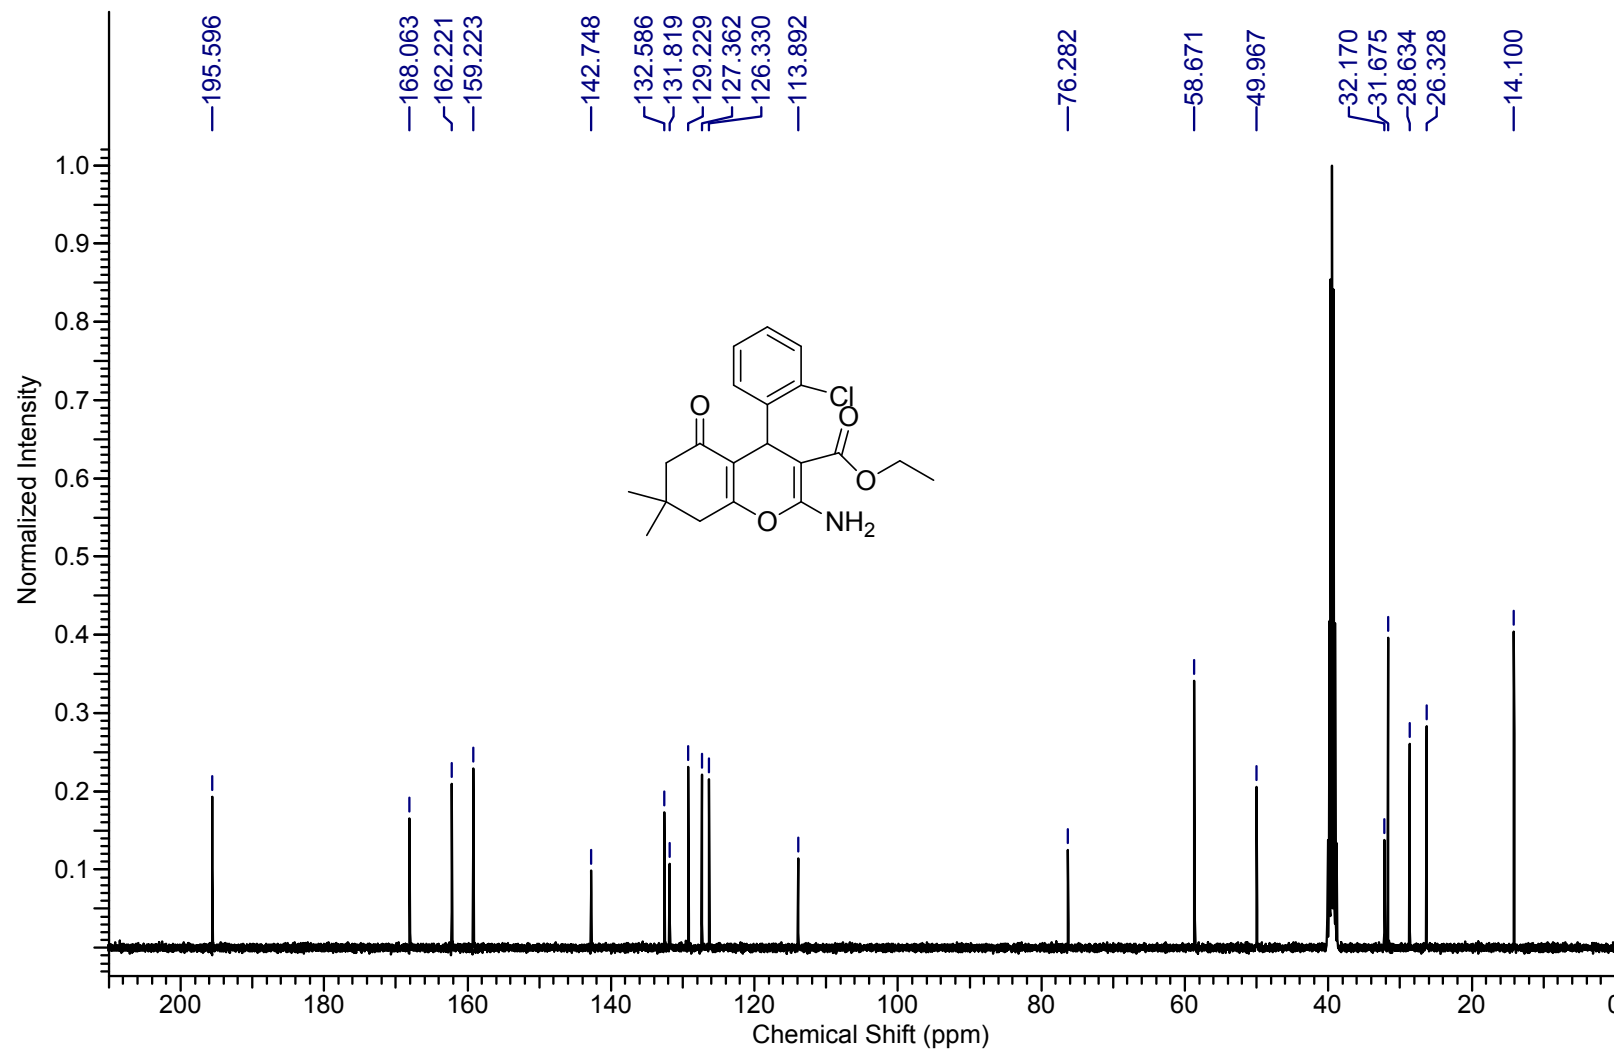



# $^1\text{H}$ NMR of 11b

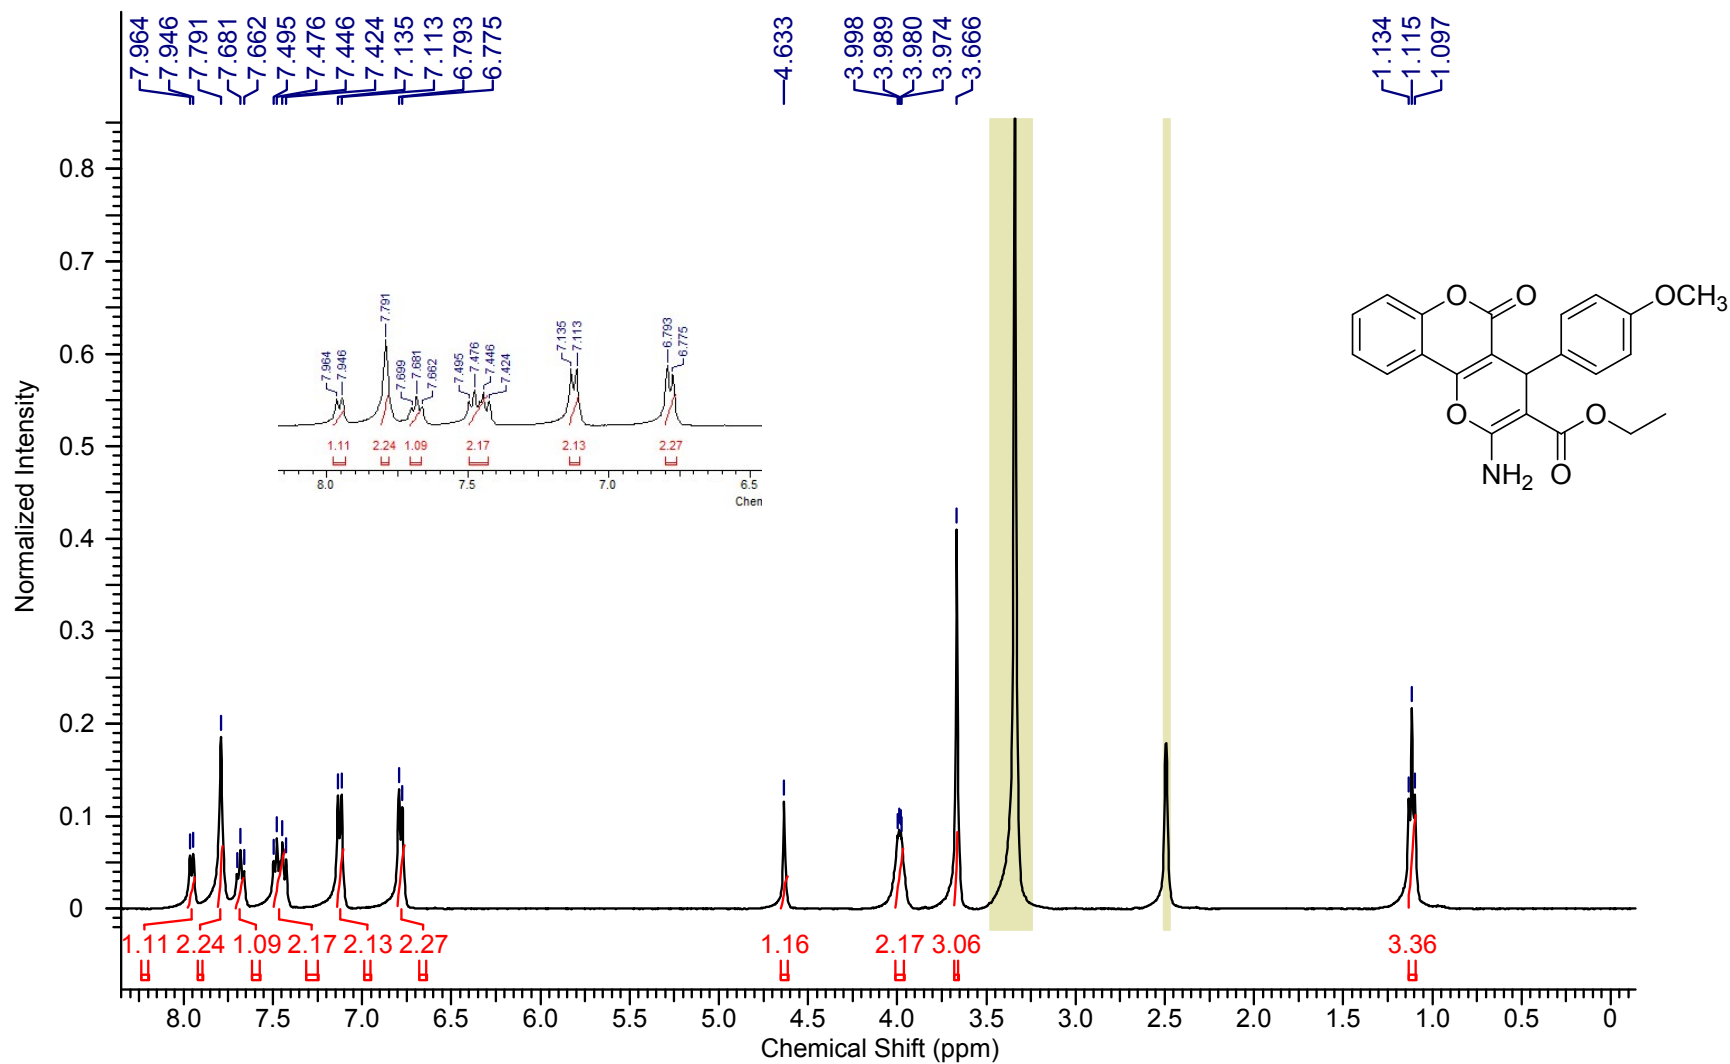

# <sup>13</sup>C NMR of 11b

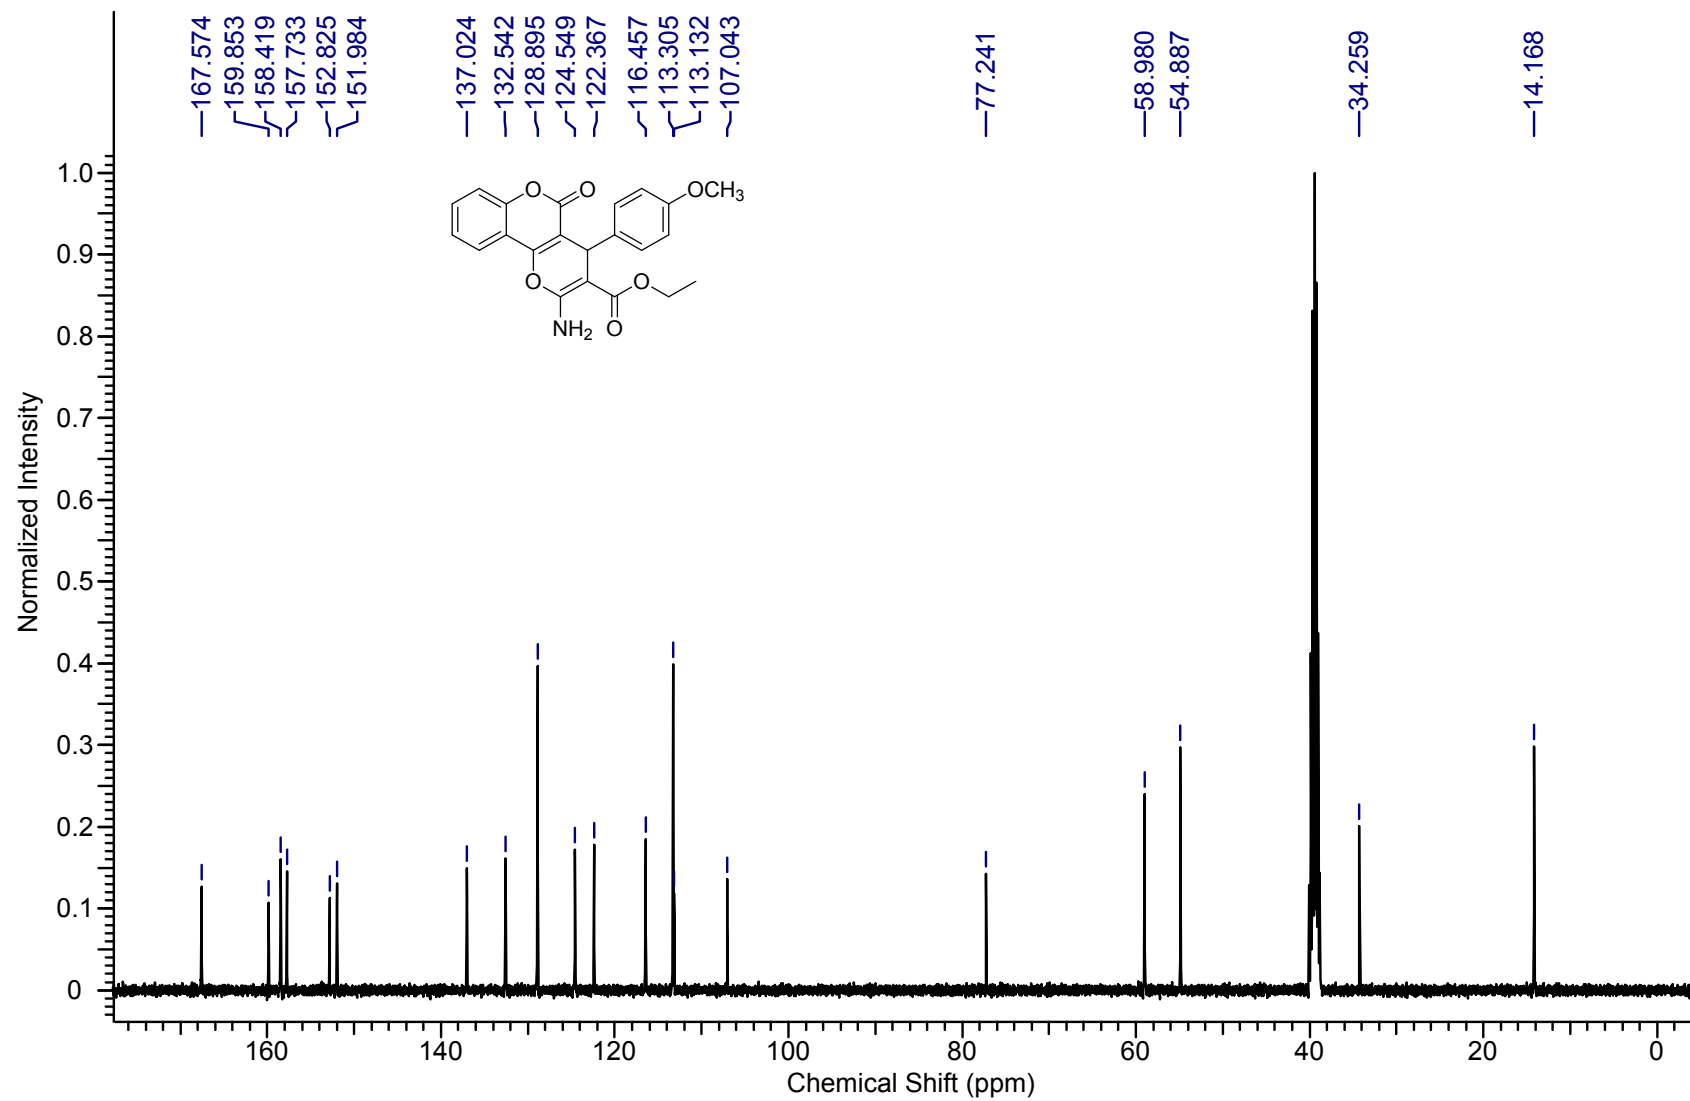

# $^1\text{H}$ NMR of 11c

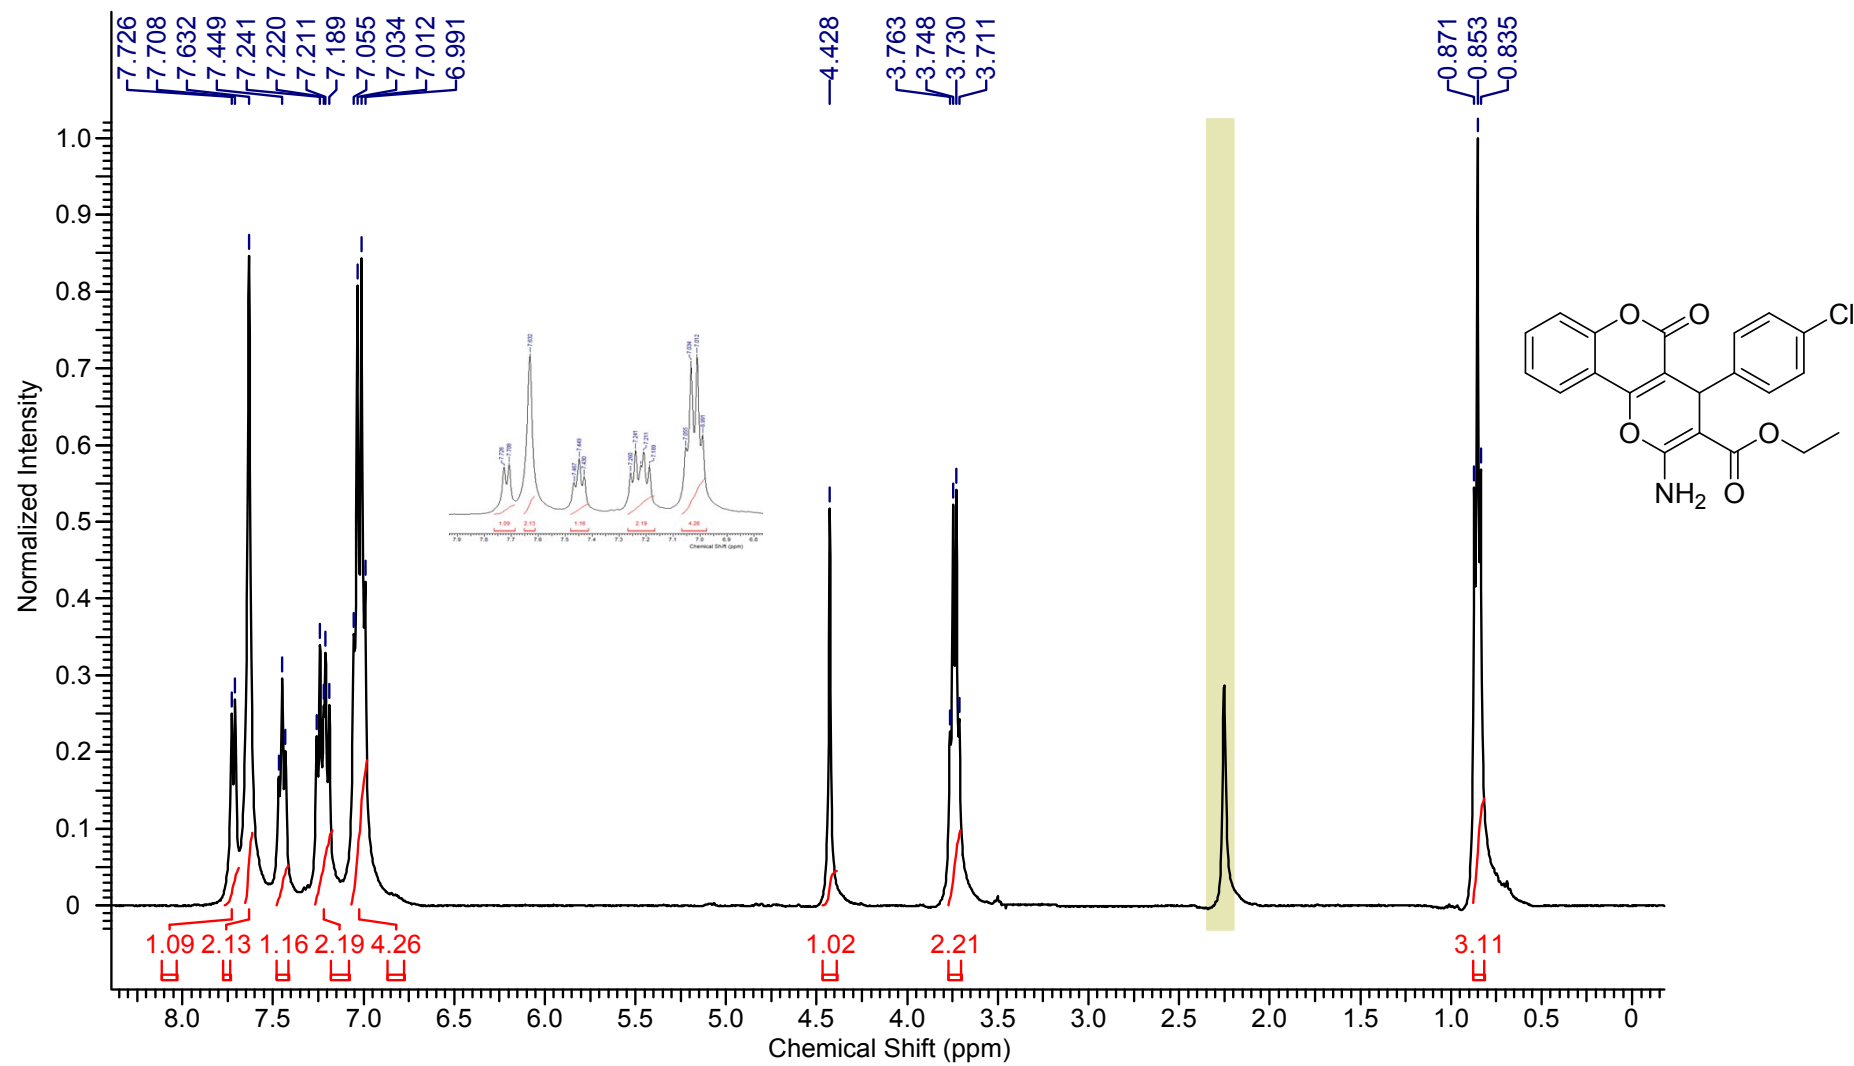

# <sup>13</sup>C NMR of 11c

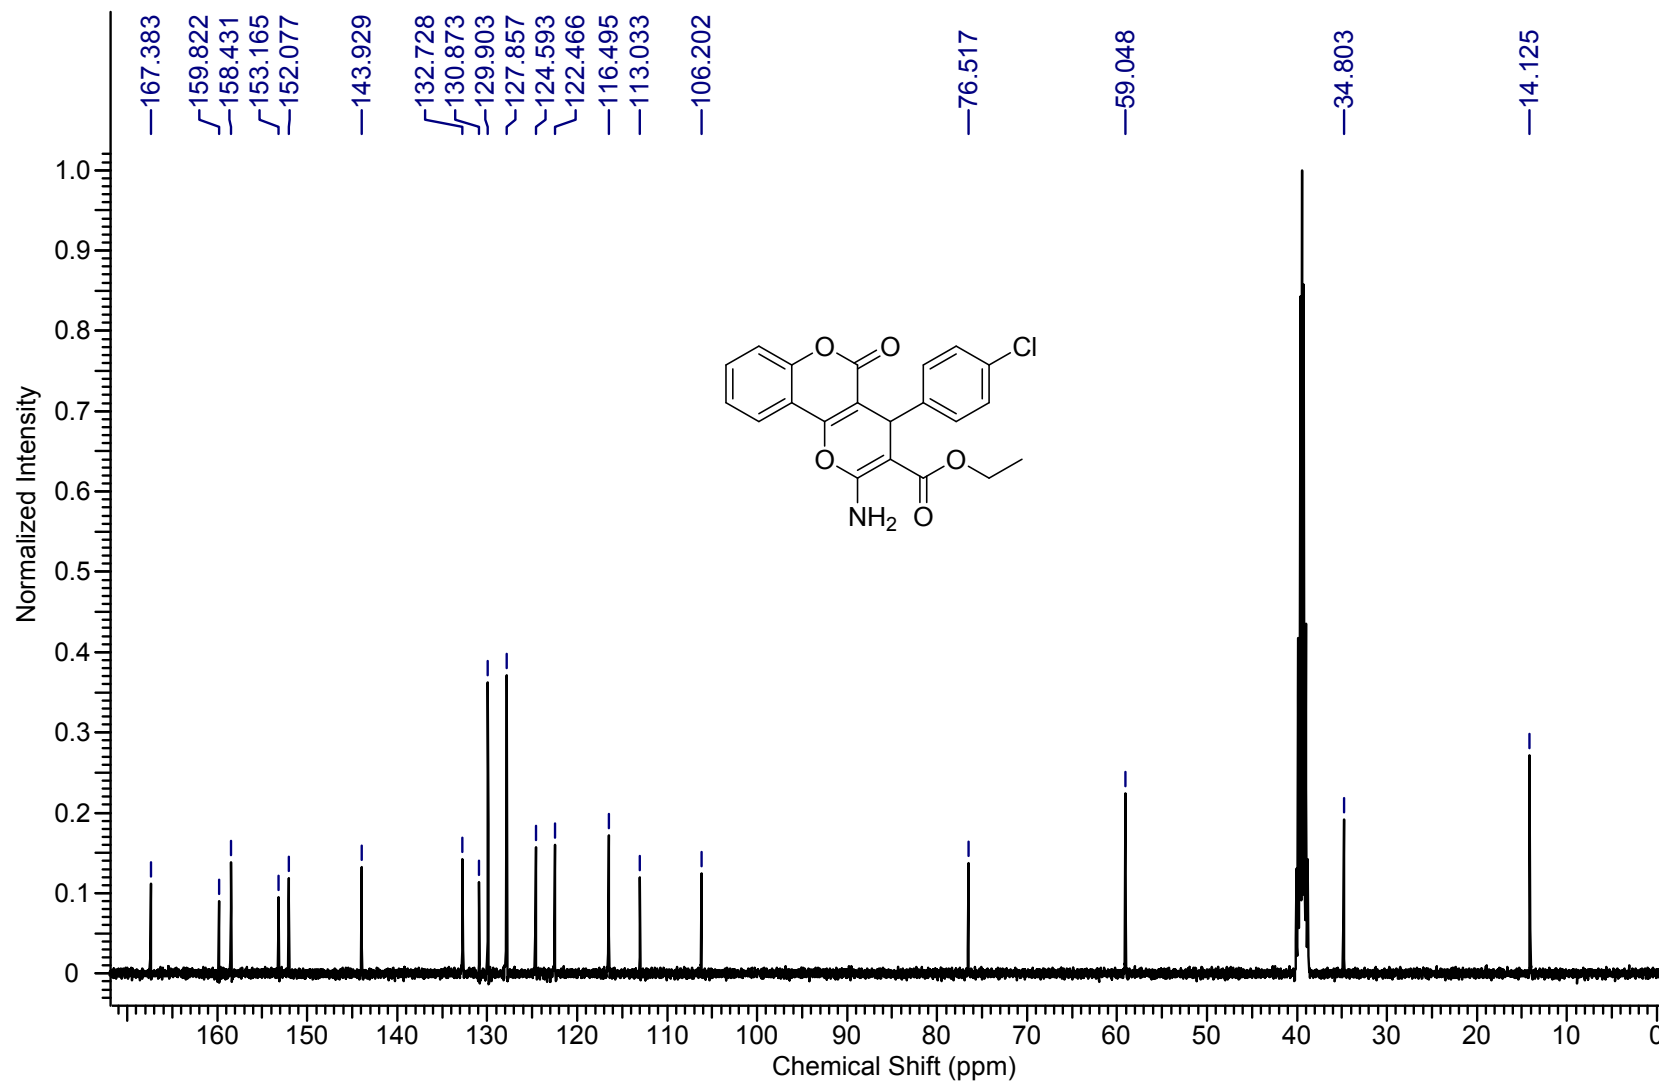

# <sup>1</sup>H NMR of 11d

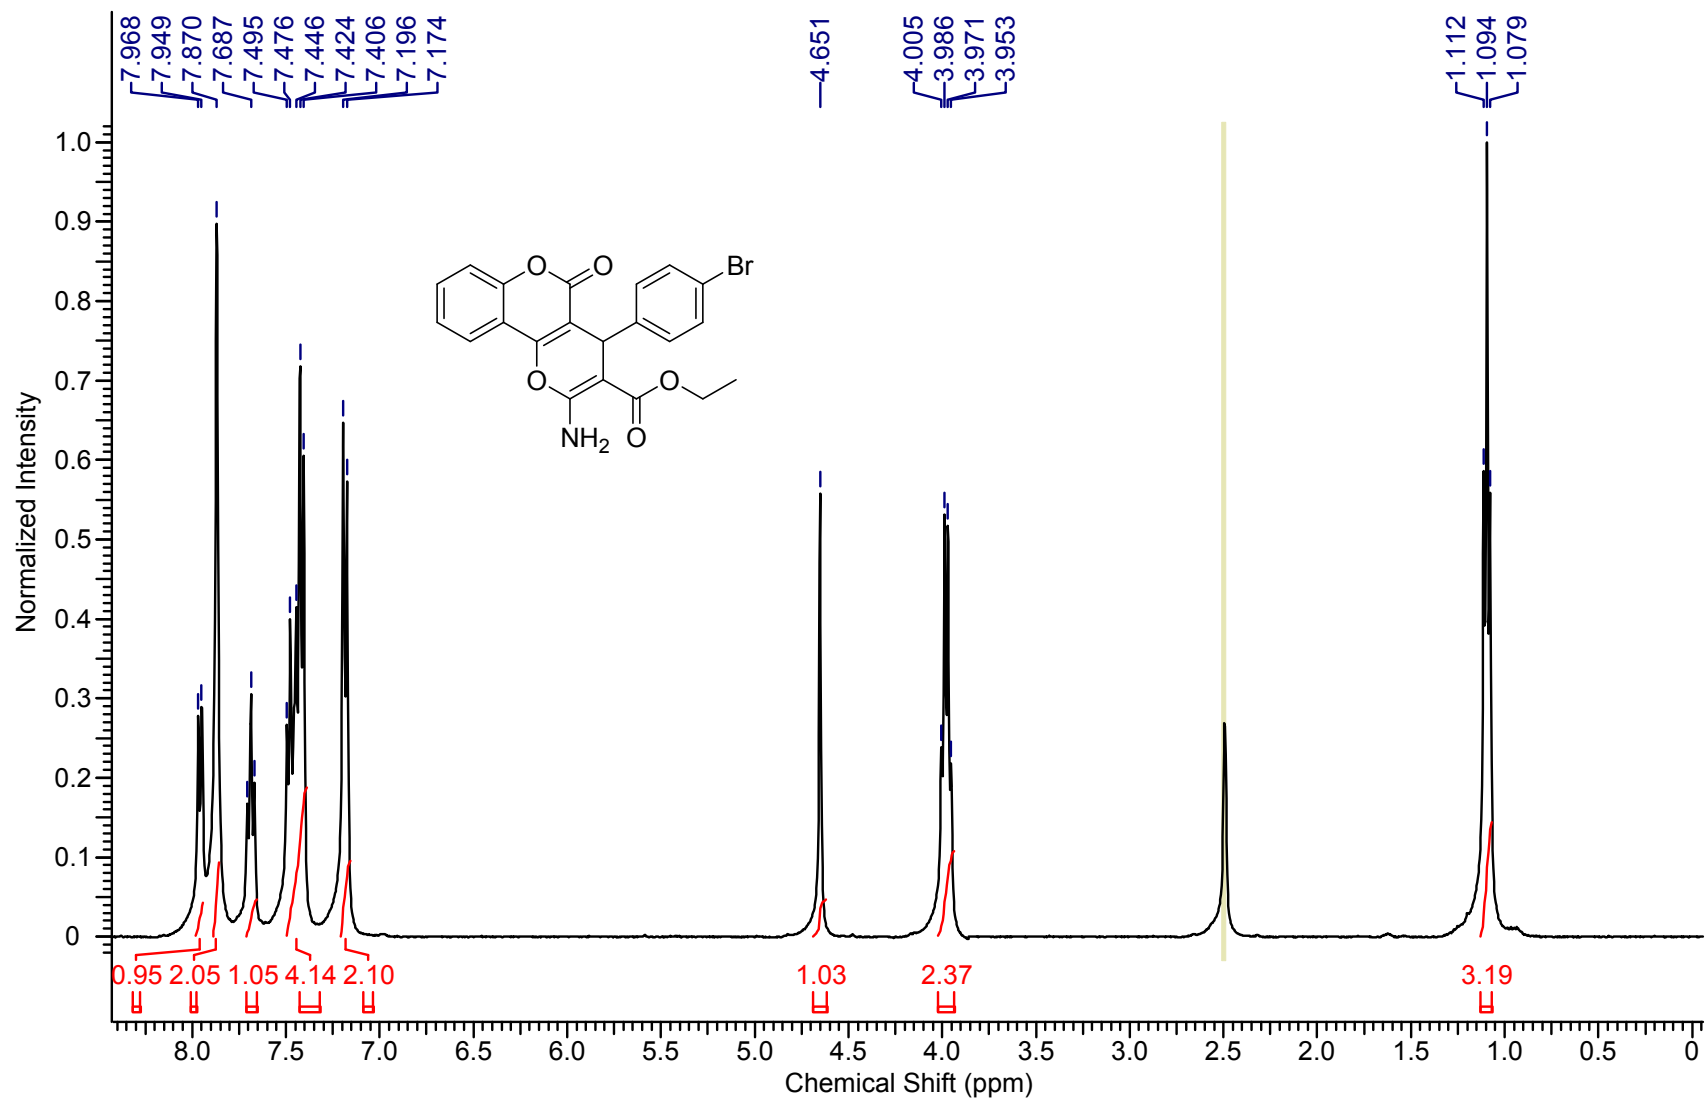

# <sup>13</sup>C NMR of 11d

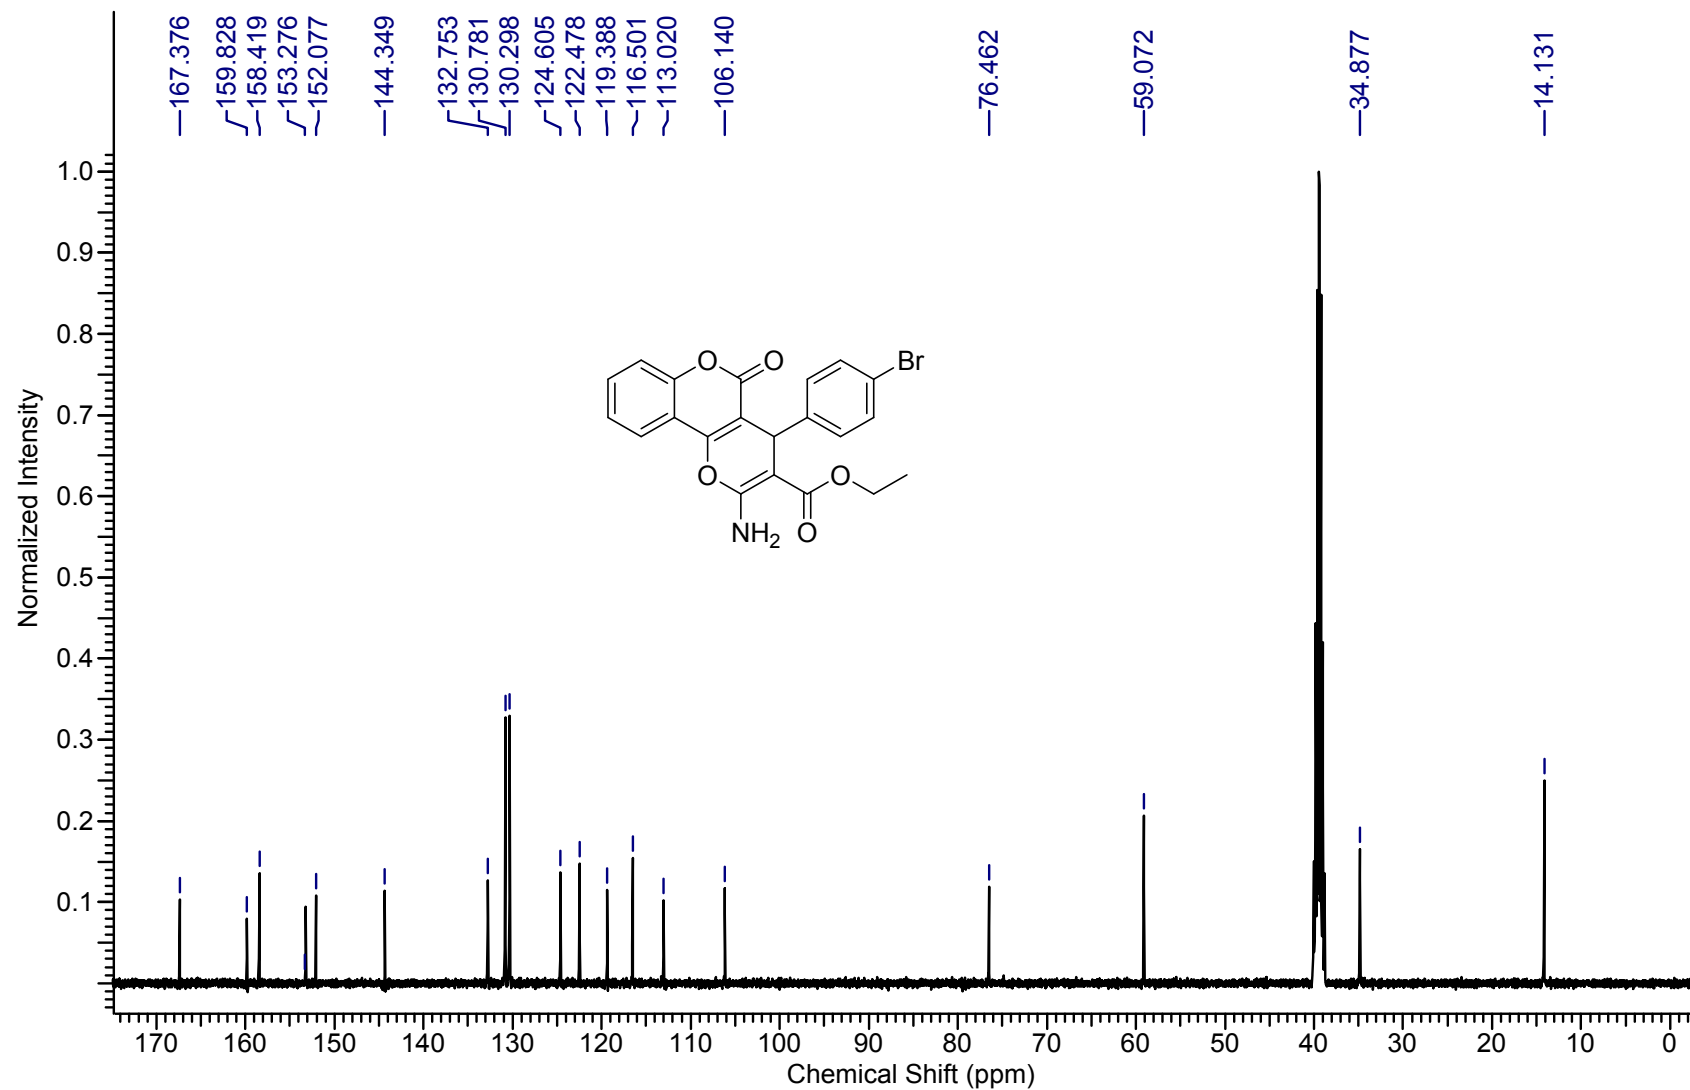

### Standard Orientation for IS<sub>1</sub>

| Center Number | Atomic Number | Atomic Type | Coordinates (Angstroms) |           |           |
|---------------|---------------|-------------|-------------------------|-----------|-----------|
|               |               |             | X                       | Y         | Z         |
| 1             | 6             | 0           | -2.328882               | -1.481502 | -0.055717 |
| 2             | 6             | 0           | -1.473785               | -0.353204 | -0.056978 |
| 3             | 6             | 0           | -2.077394               | 0.919956  | 0.022962  |
| 4             | 6             | 0           | -3.456794               | 1.047588  | 0.100917  |
| 5             | 6             | 0           | -4.298874               | -0.075821 | 0.105545  |
| 6             | 6             | 0           | -3.706841               | -1.344556 | 0.021922  |
| 7             | 1             | 0           | -1.897127               | -2.474574 | -0.121977 |
| 8             | 1             | 0           | -1.470349               | 1.812517  | 0.020512  |
| 9             | 1             | 0           | -3.889553               | 2.041569  | 0.157625  |
| 10            | 1             | 0           | -4.331310               | -2.232342 | 0.015576  |
| 11            | 6             | 0           | -0.043961               | -0.606629 | -0.146134 |
| 12            | 6             | 0           | 1.057191                | 0.201391  | -0.183501 |
| 13            | 6             | 0           | 1.047280                | 1.628098  | -0.136965 |
| 14            | 6             | 0           | 2.405224                | -0.475766 | -0.283033 |
| 15            | 7             | 0           | 1.025786                | 2.791625  | -0.098200 |
| 16            | 8             | 0           | 3.412587                | 0.408724  | -0.279941 |
| 17            | 8             | 0           | 2.566832                | -1.682441 | -0.296644 |
| 18            | 6             | 0           | 4.770143                | -0.110412 | -0.331031 |
| 19            | 6             | 0           | 5.306664                | -0.356302 | 1.068093  |
| 20            | 1             | 0           | 5.263880                | 0.555203  | 1.668108  |
| 21            | 1             | 0           | 4.740264                | -1.141888 | 1.572469  |
| 22            | 1             | 0           | 6.350380                | -0.677794 | 1.005925  |
| 23            | 1             | 0           | 5.334220                | 0.670306  | -0.842901 |
| 24            | 1             | 0           | 4.772403                | -1.022031 | -0.929488 |
| 25            | 1             | 0           | 0.226308                | -1.659209 | -0.195195 |
| 26            | 6             | 0           | -5.792987               | 0.077673  | 0.229644  |
| 27            | 1             | 0           | -6.322701               | -0.743350 | -0.259042 |
| 28            | 1             | 0           | -6.096620               | 0.079677  | 1.282594  |
| 29            | 1             | 0           | -6.137562               | 1.017189  | -0.208473 |

Rotational constants (GHZ):            1.5404945            0.2090121            0.1881950

Standard basis: 6-31+G(d,p) (6D, 7F)

There are 369 symmetry adapted basis functions of A symmetry.

### Standard Orientation for IS<sub>2</sub>

| Center Number | Atomic Number | Atomic Type | Coordinates (Angstroms) |          |           |
|---------------|---------------|-------------|-------------------------|----------|-----------|
|               |               |             | X                       | Y        | Z         |
| 1             | 6             | 0           | -0.431670               | 1.535414 | -0.817561 |
| 2             | 6             | 0           | -0.401815               | 1.102897 | 0.515147  |
| 3             | 6             | 0           | 0.490813                | 1.689413 | 1.422444  |
| 4             | 6             | 0           | 1.353283                | 2.708884 | 0.997023  |

|    |   |   |           |           |           |
|----|---|---|-----------|-----------|-----------|
| 5  | 6 | 0 | 1.323106  | 3.141701  | -0.335594 |
| 6  | 6 | 0 | 0.430722  | 2.554866  | -1.242932 |
| 7  | 1 | 0 | 0.513862  | 1.358948  | 2.439832  |
| 8  | 1 | 0 | 2.034861  | 3.156834  | 1.689616  |
| 9  | 1 | 0 | 0.407758  | 2.885067  | -2.260390 |
| 10 | 6 | 0 | -1.350357 | -0.016798 | 0.982077  |
| 11 | 6 | 0 | -2.644613 | 0.027000  | 0.148613  |
| 12 | 6 | 0 | -0.664464 | -1.382857 | 0.794029  |
| 13 | 6 | 0 | -0.351157 | -1.559578 | -0.706729 |
| 14 | 6 | 0 | 0.618169  | -1.397966 | 1.652097  |
| 15 | 6 | 0 | 1.020842  | -1.174461 | -1.290713 |
| 16 | 6 | 0 | 1.985738  | -1.013730 | 1.057762  |
| 17 | 6 | 0 | 2.140591  | -1.629538 | -0.341672 |
| 18 | 1 | 0 | 1.159470  | -1.668130 | -2.229907 |
| 19 | 1 | 0 | 2.765755  | -1.400541 | 1.679800  |
| 20 | 6 | 0 | -2.735819 | -0.687999 | -1.000992 |
| 21 | 8 | 0 | -2.826247 | -1.347924 | -2.066507 |
| 22 | 8 | 0 | -1.241032 | -2.013668 | -1.471861 |
| 23 | 8 | 0 | 0.541810  | -1.716266 | 2.867148  |
| 24 | 6 | 0 | -3.728064 | 0.805563  | 0.577438  |
| 25 | 7 | 0 | -4.613395 | 1.443095  | 0.929867  |
| 26 | 6 | 0 | 2.074670  | -3.162290 | -0.209881 |
| 27 | 6 | 0 | 3.501893  | -1.212978 | -0.929155 |
| 28 | 1 | 0 | 4.286452  | -1.546194 | -0.282334 |
| 29 | 1 | 0 | 3.541187  | -0.147389 | -1.017735 |
| 30 | 1 | 0 | 3.623987  | -1.655970 | -1.895458 |
| 31 | 1 | 0 | 1.126848  | -3.444795 | 0.198438  |
| 32 | 1 | 0 | 2.194645  | -3.608768 | -1.174867 |
| 33 | 1 | 0 | 2.856789  | -3.498475 | 0.438369  |
| 34 | 1 | 0 | -1.319556 | -2.165009 | 1.116740  |
| 35 | 1 | 0 | 1.057858  | -0.114754 | -1.434389 |
| 36 | 1 | 0 | 2.061891  | 0.052478  | 1.009367  |
| 37 | 1 | 0 | -1.586890 | 0.124219  | 2.016132  |
| 38 | 1 | 0 | -1.112996 | 1.087280  | -1.510350 |
| 39 | 6 | 0 | 2.270681  | 4.262513  | -0.802887 |
| 40 | 1 | 0 | 1.793148  | 5.211035  | -0.671734 |
| 41 | 1 | 0 | 3.170421  | 4.233069  | -0.224490 |
| 42 | 1 | 0 | 2.506748  | 4.121962  | -1.837035 |

-----  
Rotational constants (GHZ):           0.3048446           0.2745180  
0.1996884

Standard basis: 6-31+G(d,p) (6D, 7F)

There are 532 symmetry adapted basis functions of A symmetry

### Standard Orientation for IS<sub>3</sub>

| Center<br>Number | Atomic<br>Number | Atomic<br>Type | Coordinates (Angstroms) |           |           |
|------------------|------------------|----------------|-------------------------|-----------|-----------|
|                  |                  |                | X                       | Y         | Z         |
| 1                | 6                | 0              | 2.294889                | 0.335537  | -0.760460 |
| 2                | 6                | 0              | 1.706033                | -0.130377 | 0.422814  |
| 3                | 6                | 0              | 2.276962                | -1.208652 | 1.112219  |



|    |   |   |           |           |           |
|----|---|---|-----------|-----------|-----------|
| 4  | 6 | 0 | 3.436743  | -1.820952 | 0.618334  |
| 5  | 6 | 0 | 4.025534  | -1.355050 | -0.564968 |
| 6  | 6 | 0 | 3.454579  | -0.276808 | -1.254385 |
| 7  | 1 | 0 | 1.827397  | -1.564393 | 2.015641  |
| 8  | 1 | 0 | 3.872748  | -2.644206 | 1.144701  |
| 9  | 1 | 0 | 3.904107  | 0.078907  | -2.157860 |
| 10 | 6 | 0 | 0.431563  | 0.542791  | 0.965237  |
| 11 | 6 | 0 | 0.423869  | 2.028542  | 0.560163  |
| 12 | 6 | 0 | -0.808258 | -0.156159 | 0.377133  |
| 13 | 6 | 0 | -1.345132 | 0.284245  | -0.790701 |
| 14 | 6 | 0 | -1.436620 | -1.351005 | 1.112397  |
| 15 | 6 | 0 | -2.588310 | -0.402114 | -1.402496 |
| 16 | 6 | 0 | -2.673015 | -2.030484 | 0.510914  |
| 17 | 6 | 0 | -3.474501 | -0.986719 | -0.283885 |
| 18 | 1 | 0 | -3.150967 | 0.318609  | -1.958257 |
| 19 | 1 | 0 | -3.281322 | -2.432728 | 1.293894  |
| 20 | 6 | 0 | -0.144632 | 2.409166  | -0.609823 |
| 21 | 8 | 0 | -0.672319 | 2.763143  | -1.695990 |
| 22 | 8 | 0 | -0.751597 | 1.397584  | -1.463796 |
| 23 | 8 | 0 | -0.943689 | -1.765432 | 2.193561  |
| 24 | 6 | 0 | 1.005451  | 2.988245  | 1.402557  |
| 25 | 7 | 0 | 1.480730  | 3.768138  | 2.092145  |
| 26 | 6 | 0 | -3.922503 | 0.145537  | 0.658834  |
| 27 | 6 | 0 | -4.713581 | -1.657072 | -0.905650 |
| 28 | 1 | 0 | -5.327448 | -2.062342 | -0.128637 |
| 29 | 1 | 0 | -4.402464 | -2.443437 | -1.561127 |
| 30 | 1 | 0 | -5.271711 | -0.931182 | -1.459211 |
| 31 | 1 | 0 | -3.061668 | 0.611335  | 1.091130  |
| 32 | 1 | 0 | -4.480243 | 0.871244  | 0.104633  |
| 33 | 1 | 0 | -4.536861 | -0.259279 | 1.435767  |
| 34 | 1 | 0 | -2.273813 | -1.190593 | -2.053877 |
| 35 | 1 | 0 | -2.366025 | -2.820864 | -0.141691 |
| 36 | 1 | 0 | 0.412827  | 0.463916  | 2.032202  |
| 37 | 1 | 0 | 1.858988  | 1.158876  | -1.286803 |
| 38 | 6 | 0 | 5.299998  | -2.028069 | -1.107569 |
| 39 | 1 | 0 | 6.161441  | -1.542364 | -0.699004 |
| 40 | 1 | 0 | 5.305572  | -3.060349 | -0.826179 |
| 41 | 1 | 0 | 5.318482  | -1.949144 | -2.174438 |
| 42 | 1 | 0 | -1.427723 | 1.875063  | -1.950085 |

-----  
Rotational constants (GHZ):           0.3669839           0.1942557  
0.1628345

Standard basis: 6-31+G(d,p) (6D, 7F)

There are 532 symmetry adapted basis functions of A symmetry.

### Standard Orientation for IS<sub>4</sub>

| Center<br>Number | Atomic<br>Number | Atomic<br>Type | Coordinates (Angstroms) |          |           |
|------------------|------------------|----------------|-------------------------|----------|-----------|
|                  |                  |                | X                       | Y        | Z         |
| 1                | 6                | 0              | -1.703164               | 1.686464 | -0.937759 |
| 2                | 6                | 0              | -0.966346               | 1.480349 | 0.246869  |
| 3                | 6                | 0              | -0.828749               | 2.535558 | 1.116982  |

|    |   |   |           |           |           |
|----|---|---|-----------|-----------|-----------|
| 4  | 6 | 0 | -1.355763 | 3.753651  | 0.938928  |
| 5  | 6 | 0 | -2.137625 | 3.969909  | -0.226477 |
| 6  | 6 | 0 | -2.335191 | 2.968172  | -1.152532 |
| 7  | 1 | 0 | -0.247250 | 2.346354  | 1.969918  |
| 8  | 1 | 0 | -1.182412 | 4.579761  | 1.675856  |
| 9  | 1 | 0 | -2.957454 | 3.167794  | -2.059328 |
| 10 | 6 | 0 | -0.224795 | 0.056703  | 0.737035  |
| 11 | 6 | 0 | -0.910627 | -1.191017 | 0.077771  |
| 12 | 6 | 0 | 1.300034  | 0.016008  | 0.361573  |
| 13 | 6 | 0 | 1.811497  | 0.266657  | -0.933504 |
| 14 | 6 | 0 | 2.212978  | -0.261207 | 1.517473  |
| 15 | 6 | 0 | 3.386108  | 0.391207  | -1.128458 |
| 16 | 6 | 0 | 3.750426  | -0.012205 | 1.341958  |
| 17 | 6 | 0 | 4.204229  | -0.414490 | -0.072083 |
| 18 | 1 | 0 | 3.677647  | 0.048734  | -2.121641 |
| 19 | 1 | 0 | 4.309884  | -0.606674 | 2.032356  |
| 20 | 6 | 0 | -0.264410 | -1.827151 | -1.007885 |
| 21 | 8 | 0 | 1.056174  | 0.441464  | -1.978252 |
| 22 | 8 | 0 | 1.717597  | -0.658252 | 2.614042  |
| 23 | 6 | 0 | -2.253290 | -1.624742 | 0.582662  |
| 24 | 6 | 0 | 4.055136  | -1.932530 | -0.269257 |
| 25 | 6 | 0 | 5.668420  | -0.033459 | -0.222977 |
| 26 | 1 | 0 | 6.245254  | -0.537205 | 0.511430  |
| 27 | 1 | 0 | 5.753499  | 1.027430  | -0.083110 |
| 28 | 1 | 0 | 6.011107  | -0.288166 | -1.196372 |
| 29 | 1 | 0 | 3.029767  | -2.217332 | -0.178283 |
| 30 | 1 | 0 | 4.412166  | -2.199845 | -1.239723 |
| 31 | 1 | 0 | 4.630199  | -2.438521 | 0.478215  |
| 32 | 1 | 0 | 3.628705  | 1.412324  | -1.012831 |
| 33 | 1 | 0 | 3.952442  | 1.022990  | 1.499999  |
| 34 | 1 | 0 | -0.326370 | 0.020797  | 1.835508  |
| 35 | 1 | 0 | -1.771090 | 0.913280  | -1.630067 |
| 36 | 1 | 0 | 1.435722  | 0.704469  | -2.830906 |
| 37 | 7 | 0 | 0.351209  | -2.433148 | -2.042124 |
| 38 | 1 | 0 | -0.290927 | -2.729102 | -2.879537 |
| 39 | 8 | 0 | -2.779085 | -1.145183 | 1.651993  |
| 40 | 8 | 0 | -2.948531 | -2.544808 | -0.073464 |
| 41 | 6 | 0 | -4.101484 | -3.103378 | 0.442266  |
| 42 | 6 | 0 | -4.513571 | -4.273258 | -0.425389 |
| 43 | 1 | 0 | -4.865449 | -2.393270 | 0.438970  |
| 44 | 1 | 0 | -3.886389 | -3.421456 | 1.465004  |
| 45 | 1 | 0 | -5.414166 | -4.688676 | -0.035697 |
| 46 | 1 | 0 | -4.655439 | -3.919534 | -1.405621 |
| 47 | 1 | 0 | -3.754243 | -5.032611 | -0.414091 |
| 48 | 6 | 0 | -2.765467 | 5.319889  | -0.447265 |
| 49 | 1 | 0 | -2.087892 | 6.073163  | -0.113260 |
| 50 | 1 | 0 | -2.971818 | 5.441150  | -1.482747 |
| 51 | 1 | 0 | -3.673273 | 5.373662  | 0.116681  |

-----  
Rotational constants (GHZ):           0.2135412           0.1571881  
0.1098676  
Standard basis: 6-31+G(d,p) (6D, 7F)  
There are    619 symmetry adapted basis functions of A symmetry.

### Standard Orientation for IS<sub>5</sub>

| Center<br>Number | Atomic<br>Number | Atomic<br>Type | Coordinates (Angstroms) |           |           |
|------------------|------------------|----------------|-------------------------|-----------|-----------|
|                  |                  |                | X                       | Y         | Z         |
| 1                | 6                | 0              | -1.330921               | 1.810771  | -1.258437 |
| 2                | 6                | 0              | 0.081599                | 1.322824  | -0.858971 |
| 3                | 6                | 0              | 0.322843                | 1.004056  | 0.677715  |
| 4                | 6                | 0              | -0.794479               | 1.712850  | 1.442811  |
| 5                | 6                | 0              | -0.896650               | 3.096918  | 0.847919  |
| 6                | 1                | 0              | -1.991837               | 1.006974  | -1.009239 |
| 7                | 1                | 0              | 1.285603                | 1.366772  | 1.033611  |
| 8                | 1                | 0              | -1.313045               | 3.806516  | 1.536097  |
| 9                | 6                | 0              | -3.202255               | 3.163055  | -0.275681 |
| 10               | 6                | 0              | -1.675950               | 3.103213  | -0.459683 |
| 11               | 6                | 0              | -1.208231               | 4.378918  | -1.203161 |
| 12               | 8                | 0              | 0.987072                | 1.140761  | -1.713838 |
| 13               | 8                | 0              | -1.481226               | 1.256669  | 2.389706  |
| 14               | 1                | 0              | -1.426503               | 2.049529  | -2.298274 |
| 15               | 1                | 0              | 0.112023                | 3.376123  | 0.614269  |
| 16               | 1                | 0              | -1.440814               | 5.242275  | -0.615848 |
| 17               | 1                | 0              | -0.150770               | 4.330480  | -1.364076 |
| 18               | 1                | 0              | -3.456729               | 4.040844  | 0.283138  |
| 19               | 1                | 0              | -3.533050               | 2.295449  | 0.247518  |
| 20               | 1                | 0              | -3.677446               | 3.205820  | -1.236040 |
| 21               | 1                | 0              | -1.707155               | 4.448752  | -2.149959 |
| 22               | 6                | 0              | -1.842734               | -1.595114 | 1.495889  |
| 23               | 6                | 0              | -0.946149               | -1.265856 | 0.446037  |
| 24               | 6                | 0              | -1.232936               | -1.653239 | -0.851455 |
| 25               | 6                | 0              | -2.391684               | -2.395242 | -1.118263 |
| 26               | 6                | 0              | -3.253343               | -2.770521 | -0.085131 |
| 27               | 6                | 0              | -2.989368               | -2.355236 | 1.229223  |
| 28               | 1                | 0              | -1.654737               | -1.257859 | 2.499897  |
| 29               | 1                | 0              | -0.569043               | -1.377474 | -1.644906 |
| 30               | 1                | 0              | -2.610921               | -2.692311 | -2.123369 |
| 31               | 1                | 0              | -3.658556               | -2.630280 | 2.025982  |
| 32               | 6                | 0              | 0.373005                | -0.531590 | 0.771970  |
| 33               | 6                | 0              | 1.486677                | -0.764045 | -0.278949 |
| 34               | 6                | 0              | 1.411805                | -2.137696 | -0.956683 |
| 35               | 6                | 0              | 2.883958                | -0.591799 | 0.433706  |
| 36               | 7                | 0              | 1.356717                | -3.148242 | -1.455278 |
| 37               | 8                | 0              | 3.979908                | -1.154225 | -0.046646 |
| 38               | 8                | 0              | 2.969093                | 0.090330  | 1.509808  |
| 39               | 6                | 0              | 5.267718                | -0.807998 | 0.435149  |
| 40               | 6                | 0              | 5.807735                | 0.365357  | -0.408910 |
| 41               | 1                | 0              | 5.871363                | 0.064832  | -1.437848 |
| 42               | 1                | 0              | 5.143346                | 1.197788  | -0.324469 |
| 43               | 1                | 0              | 6.779790                | 0.641685  | -0.060475 |
| 44               | 1                | 0              | 5.917357                | -1.654298 | 0.334193  |
| 45               | 1                | 0              | 5.206521                | -0.519714 | 1.460417  |
| 46               | 1                | 0              | 0.635324                | -0.896489 | 1.754713  |
| 47               | 6                | 0              | -4.514191               | -3.618465 | -0.376701 |
| 48               | 1                | 0              | -4.254975               | -4.660403 | -0.328851 |
| 49               | 1                | 0              | -5.270599               | -3.415301 | 0.357715  |

|    |   |   |           |           |           |
|----|---|---|-----------|-----------|-----------|
| 50 | 1 | 0 | -4.885669 | -3.386842 | -1.346412 |
| 51 | 1 | 0 | 1.376040  | -0.040424 | -1.023438 |

-----  
 Rotational constants (GHZ):           0.2431581       0.1714028  
 0.1217261

Standard basis: 6-31+G(d,p) (6D, 7F)

There are 619 symmetry adapted basis functions of A symmetry.

### Standard Orientation for IS<sub>6</sub>

| Center<br>Number | Atomic<br>Number | Atomic<br>Type | Coordinates (Angstroms) |           |           |
|------------------|------------------|----------------|-------------------------|-----------|-----------|
|                  |                  |                | X                       | Y         | Z         |
| 1                | 6                | 0              | -1.834581               | 1.049578  | -0.698714 |
| 2                | 6                | 0              | -0.960782               | 1.049228  | 0.446014  |
| 3                | 6                | 0              | -0.984020               | 2.192435  | 1.298854  |
| 4                | 6                | 0              | -1.833148               | 3.277128  | 1.034150  |
| 5                | 6                | 0              | -2.702065               | 3.240394  | -0.041486 |
| 6                | 6                | 0              | -2.715175               | 2.149866  | -0.906659 |
| 7                | 1                | 0              | -0.336866               | 2.232628  | 2.154589  |
| 8                | 1                | 0              | -1.817183               | 4.119454  | 1.659374  |
| 9                | 1                | 0              | -3.381792               | 2.144997  | -1.723040 |
| 10               | 6                | 0              | -0.004024               | -0.140182 | 0.867471  |
| 11               | 6                | 0              | -0.462423               | -1.505343 | 0.286851  |
| 12               | 6                | 0              | 1.497082                | 0.085236  | 0.448874  |
| 13               | 6                | 0              | 1.899522                | 0.759196  | -0.686218 |
| 14               | 6                | 0              | 2.569470                | -0.515730 | 1.400072  |
| 15               | 6                | 0              | 3.443107                | 1.029633  | -0.916104 |
| 16               | 6                | 0              | 4.052856                | -0.212498 | 1.192614  |
| 17               | 6                | 0              | 4.347825                | -0.079611 | -0.297950 |
| 18               | 1                | 0              | 3.642954                | 1.083819  | -1.974989 |
| 19               | 1                | 0              | 4.641611                | -1.008888 | 1.595894  |
| 20               | 6                | 0              | -0.349587               | -1.541397 | -1.233147 |
| 21               | 8                | 0              | 0.933684                | 1.253475  | -1.639096 |
| 22               | 8                | 0              | 2.209267                | -1.231599 | 2.370081  |
| 23               | 6                | 0              | -1.912521               | -1.782116 | 0.711166  |
| 24               | 6                | 0              | 4.123553                | -1.442731 | -0.993465 |
| 25               | 6                | 0              | 5.825383                | 0.314041  | -0.465861 |
| 26               | 1                | 0              | 6.447434                | -0.428420 | -0.016449 |
| 27               | 1                | 0              | 5.997026                | 1.247691  | 0.008683  |
| 28               | 1                | 0              | 6.062692                | 0.388629  | -1.496609 |
| 29               | 1                | 0              | 3.108832                | -1.745472 | -0.885687 |
| 30               | 1                | 0              | 4.358760                | -1.364592 | -2.028668 |
| 31               | 1                | 0              | 4.754562                | -2.181369 | -0.545194 |
| 32               | 1                | 0              | 3.693013                | 1.952205  | -0.456706 |
| 33               | 1                | 0              | 4.290980                | 0.691008  | 1.694650  |
| 34               | 1                | 0              | -0.012590               | -0.183738 | 1.954748  |
| 35               | 1                | 0              | -1.837320               | 0.230659  | -1.391490 |
| 36               | 1                | 0              | 1.362859                | 1.295360  | -2.501222 |
| 37               | 7                | 0              | -0.264773               | -1.568491 | -2.375504 |
| 38               | 8                | 0              | -2.282546               | -1.503554 | 1.854509  |

|    |   |   |           |           |           |
|----|---|---|-----------|-----------|-----------|
| 39 | 8 | 0 | -2.695382 | -2.287683 | -0.152383 |
| 40 | 6 | 0 | -4.007819 | -2.723796 | 0.260222  |
| 41 | 6 | 0 | -4.702561 | -3.435512 | -0.918259 |
| 42 | 1 | 0 | -4.592431 | -1.879415 | 0.527207  |
| 43 | 1 | 0 | -3.943003 | -3.387534 | 1.106031  |
| 44 | 1 | 0 | -5.688883 | -3.743833 | -0.637311 |
| 45 | 1 | 0 | -4.779358 | -2.759380 | -1.737741 |
| 46 | 1 | 0 | -4.147456 | -4.287395 | -1.209695 |
| 47 | 1 | 0 | 0.224216  | -2.268773 | 0.668261  |
| 48 | 6 | 0 | -3.625977 | 4.398484  | -0.244997 |
| 49 | 1 | 0 | -3.145837 | 5.280373  | 0.124002  |
| 50 | 1 | 0 | -3.829076 | 4.494813  | -1.284111 |
| 51 | 1 | 0 | -4.524607 | 4.213677  | 0.298546  |

-----  
Rotational constants (GHZ):           0.2709428           0.1460954  
0.1161549

Standard basis: 6-31+G(d,p) (6D, 7F)

There are 619 symmetry adapted basis functions of A symmetry.

### Standard Orientation for A

| Center<br>Number | Atomic<br>Number | Atomic<br>Type | Coordinates (Angstroms) |           |           |
|------------------|------------------|----------------|-------------------------|-----------|-----------|
|                  |                  |                | X                       | Y         | Z         |
| 1                | 6                | 0              | 1.043130                | -0.741264 | -0.019062 |
| 2                | 6                | 0              | 0.693958                | -1.215291 | -1.238546 |
| 3                | 6                | 0              | -1.592423               | -0.550600 | -0.944796 |
| 4                | 6                | 0              | -1.329853               | -0.049434 | 0.293829  |
| 5                | 6                | 0              | 0.119562                | 0.239162  | 0.707663  |
| 6                | 6                | 0              | -2.479074               | 0.224112  | 1.277909  |
| 7                | 6                | 0              | -3.047592               | -0.851467 | -1.378972 |
| 8                | 6                | 0              | -3.918033               | -0.086070 | 0.849927  |
| 9                | 6                | 0              | -3.895504               | -1.249611 | -0.154693 |
| 10               | 6                | 0              | -3.279151               | -2.495593 | 0.510149  |
| 11               | 6                | 0              | -5.335057               | -1.566962 | -0.603942 |
| 12               | 1                | 0              | -2.279121               | -2.275407 | 0.821568  |
| 13               | 1                | 0              | -5.921909               | -1.843668 | 0.246888  |
| 14               | 1                | 0              | -3.864491               | -2.773258 | 1.361215  |
| 15               | 1                | 0              | -5.763910               | -0.702642 | -1.066571 |
| 16               | 1                | 0              | -3.263943               | -3.303381 | -0.191498 |
| 17               | 1                | 0              | -5.319349               | -2.375425 | -1.304519 |
| 18               | 8                | 0              | -0.528888               | -0.808855 | -1.878550 |
| 19               | 8                | 0              | -2.241808               | 0.694780  | 2.420004  |
| 20               | 1                | 0              | -4.349390               | 0.778116  | 0.388810  |
| 21               | 1                | 0              | -4.498708               | -0.358880 | 1.705962  |
| 22               | 1                | 0              | -3.044805               | -1.657605 | -2.082594 |
| 23               | 1                | 0              | -3.470715               | 0.019935  | -1.834233 |
| 24               | 6                | 0              | 0.501292                | 1.679802  | 0.316578  |
| 25               | 6                | 0              | 1.039892                | 1.932266  | -0.952181 |
| 26               | 6                | 0              | 0.314938                | 2.734537  | 1.221337  |
| 27               | 6                | 0              | 1.399796                | 3.236452  | -1.315105 |
| 28               | 1                | 0              | 1.177016                | 1.127335  | -1.644616 |
| 29               | 6                | 0              | 0.676984                | 4.040207  | 0.858179  |

|    |   |   |           |           |           |
|----|---|---|-----------|-----------|-----------|
| 30 | 1 | 0 | -0.101713 | 2.543356  | 2.188241  |
| 31 | 6 | 0 | 1.220074  | 4.290537  | -0.410201 |
| 32 | 1 | 0 | 1.811932  | 3.426841  | -2.284652 |
| 33 | 1 | 0 | 0.538695  | 4.845773  | 1.548536  |
| 34 | 1 | 0 | 0.223538  | 0.117435  | 1.766307  |
| 35 | 6 | 0 | 2.366674  | -1.182907 | 0.634326  |
| 36 | 6 | 0 | 3.978003  | -2.854658 | 0.892538  |
| 37 | 6 | 0 | 4.947650  | -3.788442 | 0.146056  |
| 38 | 8 | 0 | 3.246150  | -2.075287 | -0.055820 |
| 39 | 8 | 0 | 2.676775  | -0.755821 | 1.776905  |
| 40 | 1 | 0 | 4.533699  | -2.204651 | 1.535710  |
| 41 | 1 | 0 | 3.297639  | -3.438403 | 1.477595  |
| 42 | 1 | 0 | 5.496900  | -4.372130 | 0.854292  |
| 43 | 1 | 0 | 4.393148  | -4.437696 | -0.498013 |
| 44 | 1 | 0 | 5.627570  | -3.202997 | -0.437149 |
| 45 | 7 | 0 | 1.505062  | -2.075607 | -1.861746 |
| 46 | 1 | 0 | 1.259649  | -2.429741 | -2.763864 |
| 47 | 1 | 0 | 2.357220  | -2.364723 | -1.425276 |
| 48 | 6 | 0 | 1.619840  | 5.723083  | -0.810802 |
| 49 | 1 | 0 | 1.918329  | 6.267484  | 0.060538  |
| 50 | 1 | 0 | 2.433999  | 5.685808  | -1.504159 |
| 51 | 1 | 0 | 0.784823  | 6.212072  | -1.267775 |

-----  
Rotational constants (GHZ):           0.2054545           0.1715098  
0.1137810  
Standard basis: 6-31+G(d,p) (6D, 7F)  
There are    619 symmetry adapted basis functions of A symmetry.

### Standard Orientation for B

| Center<br>Number | Atomic<br>Number | Atomic<br>Type | Coordinates (Angstroms) |           |           |
|------------------|------------------|----------------|-------------------------|-----------|-----------|
|                  |                  |                | X                       | Y         | Z         |
| 1                | 6                | 0              | 2.278392                | 0.245304  | -0.776183 |
| 2                | 6                | 0              | 1.674120                | -0.199206 | 0.407535  |
| 3                | 6                | 0              | 2.231481                | -1.269852 | 1.119567  |
| 4                | 6                | 0              | 3.393116                | -1.895984 | 0.647883  |
| 5                | 6                | 0              | 3.997390                | -1.451470 | -0.535833 |
| 6                | 6                | 0              | 3.440027                | -0.380827 | -1.247866 |
| 7                | 1                | 0              | 1.770106                | -1.609247 | 2.023361  |
| 8                | 1                | 0              | 3.818675                | -2.713443 | 1.191537  |
| 9                | 1                | 0              | 3.901404                | -0.041431 | -2.151659 |
| 10               | 6                | 0              | 0.397603                | 0.488856  | 0.925874  |
| 11               | 6                | 0              | 0.392172                | 1.958795  | 0.496848  |
| 12               | 6                | 0              | -0.837019               | -0.199119 | 0.334536  |
| 13               | 6                | 0              | -1.354713               | 0.235291  | -0.846692 |
| 14               | 6                | 0              | -1.485452               | -1.377000 | 1.079502  |
| 15               | 6                | 0              | -2.601683               | -0.448908 | -1.456197 |
| 16               | 6                | 0              | -2.723914               | -2.049514 | 0.477275  |
| 17               | 6                | 0              | -3.504846               | -1.006766 | -0.337610 |
| 18               | 1                | 0              | -3.151850               | 0.269073  | -2.027789 |
| 19               | 1                | 0              | -3.343647               | -2.433903 | 1.260267  |
| 20               | 6                | 0              | -0.168176               | 2.313651  | -0.684418 |

|    |   |   |           |           |           |
|----|---|---|-----------|-----------|-----------|
| 21 | 8 | 0 | -0.755836 | 1.333722  | -1.557638 |
| 22 | 8 | 0 | -1.006402 | -1.782957 | 2.170043  |
| 23 | 6 | 0 | 0.964826  | 2.934325  | 1.324089  |
| 24 | 6 | 0 | -3.946600 | 0.143865  | 0.585699  |
| 25 | 6 | 0 | -4.746976 | -1.670113 | -0.961055 |
| 26 | 1 | 0 | -5.372619 | -2.056934 | -0.183984 |
| 27 | 1 | 0 | -4.440180 | -2.469296 | -1.602991 |
| 28 | 1 | 0 | -5.291167 | -0.945004 | -1.529363 |
| 29 | 1 | 0 | -3.083684 | 0.604555  | 1.019334  |
| 30 | 1 | 0 | -4.490138 | 0.869027  | 0.016835  |
| 31 | 1 | 0 | -4.572911 | -0.242521 | 1.362448  |
| 32 | 1 | 0 | -2.290450 | -1.251149 | -2.092156 |
| 33 | 1 | 0 | -2.421193 | -2.852278 | -0.162124 |
| 34 | 1 | 0 | 0.369037  | 0.425033  | 1.993587  |
| 35 | 1 | 0 | 1.852834  | 1.062764  | -1.319836 |
| 36 | 8 | 0 | -0.171897 | 3.566121  | -1.037528 |
| 37 | 1 | 0 | -0.565350 | 3.828095  | -1.873090 |
| 38 | 7 | 0 | 1.433363  | 3.732483  | 2.000926  |
| 39 | 6 | 0 | 5.273915  | -2.139524 | -1.054163 |
| 40 | 1 | 0 | 5.270691  | -3.167490 | -0.757220 |
| 41 | 1 | 0 | 5.304462  | -2.076795 | -2.121885 |
| 42 | 1 | 0 | 6.133528  | -1.652349 | -0.643521 |

-----  
Rotational constants (GHZ):           0.3517217           0.1975243

0.1585231

Standard basis: 6-31+G(d,p) (6D, 7F)

There are 532 symmetry adapted basis functions of A symmetry.
